# Supplementary material for: Ubiquitous atmospheric production of organic acids mediated by cloud droplets
Source: PubMed Central journal article supplement (PMC8116209; doi:10.1038/s41586-021-03462-x), 2021-05-12
Supplement: 41586_2021_3462_MOESM1_ESM.pdf [file 41586_2021_3462_MOESM1_ESM.pdf]

---

**Supplementary information**

---

**Ubiquitous atmospheric production of  
organic acids mediated by cloud droplets**

---

In the format provided by the  
authors and unedited

# **Ubiquitous atmospheric production of organic acids mediated by warm clouds**

By Franco *et al.* (2021)

## **Supplementary Information**

### **Table of contents**

|                                                            |       |
|------------------------------------------------------------|-------|
| 1. Simulation chamber experiments                          | p. 2  |
| 2. Theoretical calculations                                | p. 7  |
| 3. Model simulations                                       | p. 15 |
| 4. Methanediol measurements                                | p. 20 |
| 5. Remaining sources of uncertainties in model simulations | p. 21 |
| 6. Model comparison with ground-based FTIR measurements    | p. 22 |
| 7. Model comparison with OMI column measurements           | p. 24 |
| 8. Supplementary figures                                   | p. 25 |
| 9. References                                              | p. 28 |
| 10. Raw quantum chemical data                              | p. 34 |

## **1. Simulation chamber experiments**

The experiments for the detection and chemical transformation of methanediol were performed in the atmosphere simulation chamber SAPHIR (Simulation of Atmospheric PHotochemistry In a large Reaction Chamber; Forschungszentrum Jülich, Germany). The chamber has a volume of 270 m<sup>3</sup> and consists of a double wall Teflon (FEP) foil being highly transparent to solar radiation. A shutter system allows fast switching between illumination and dark conditions. The air provided is mixed from ultra-pure nitrogen and oxygen (Linde, 6.0). A steady flow of air is used to replenish the air consumed by instruments and due to small leakages, while the pressure of the chamber is constantly kept slightly higher than ambient (~30 Pa). The chamber air can be humidified by evaporating ultra-pure water (Milli-Q-Water) into the air stream of the chamber. Fans inside the chamber ensure rapid mixing within 2 minutes. Further details can be found in Ref. <sup>1</sup>.

Formaldehyde (HCHO) and methanediol (HOCH<sub>2</sub>OH) were introduced into the humidified chamber by the injection of formalin solution (>36.5%, Riedel-de Haen) with a microliter syringe. Upon injection, a fine mist of the solution is produced which is evaporated in a heated flow of dry, synthetic air and subsequently flushed into the chamber. Alternatively, an aqueous solution of formaldehyde has been nebulized in an external chamber at ambient temperature and the fine fraction of the formed aerosol has been flushed into the humidified SAPHIR chamber. Both injection methods provided a mix of formaldehyde and methanediol with a maximum of ca. 50% methanediol. As a reference, only formaldehyde was injected into the chamber by pyrolysis of para-formaldehyde (puriss, Riedel-de Haen) from a closed vessel flushed by a permanent nitrogen flow (SI Tab. 1).

Experimental procedures were similar for all experiments. After humidification the flushed chamber was illuminated for approximately 2 hours to determine chamber sources of formaldehyde, formic acid (HCOOH) and other volatile organic compounds (VOCs). The chamber roof was then closed for injection of formaldehyde and methanediol followed by a dark phase for the determination of possible wall loss or conversion processes. Subsequently, a second illumination phase of several hours duration allowed the study of photochemical processes in addition to the previously determined chamber sinks and sources. Complementary, 250 ppm carbon monoxide (CO) was used as an OH scavenger during one experiment to identify photolytical loss processes.

### **a. Instrumental**

The sum of formaldehyde and methanediol was detected by means of a Hantzsch-Monitor (AL4001, AeroLaser, Germany). The air sample is pumped through a temperature controlled stripping coil where formaldehyde and methanediol are dissolved in 0.05 mol/L sulfuric acid solution. Within the aqueous solution formaldehyde is hydrated and instates an equilibrium with methanediol. The aqueous solution is then mixed with the Hantzsch reagent to form a dye from both compounds which is detected fluorimetrically. The instrument was calibrated weekly from aqueous formaldehyde standards providing an accuracy of 6% and a limit of detection (1 $\sigma$ ) of 25 ppt. Details of the instrument setup can be found in Ref. <sup>2</sup>.

Additionally formaldehyde and OH radicals were measured in-situ by differential optical absorption spectroscopy (DOAS) at 308 nm (see Ref. <sup>3</sup>). The limit of detection was 0.23 ppb for formaldehyde and  $8 \times 10^5$  molecules  $\text{cm}^{-3}$  for OH.

The methanediol concentration was derived from the difference of the Hantzsch and DOAS measurements. Methanediol was only detected during injections from aqueous formaldehyde solutions whereas DOAS and Hantzsch agree within their errors during the reference experiment (SI Tab. 1), when dry gaseous formaldehyde has been injected to humidified SAPHIR.

VOCs were measured by a proton transfer reaction time-of-flight mass spectrometer (PTR-TOF-MS-8000, Ionicon, Austria)<sup>4</sup> operated at a drift tube voltage of 590 V and a constant pressure of 2.2 mbar. In particular, formic acid was detected at its protonated molecular mass ( $m/z = 47.01276$ ). Calibrations were performed using a Liquid Calibration Unit (LCUa, Ionicon, Austria) with aqueous formic acid solutions of known concentration. The accuracy, i.e. the  $1\sigma$ -error of the sensitivity, is 3%. Other VOCs were calibrated using a self-made gas standard containing among others methanol ( $\text{CH}_3\text{OH}$ ) and acetaldehyde ( $\text{CH}_3\text{CHO}$ ) at mixing ratios of  $\sim 600$  ppb. The gas standard was further diluted by factors of 1/500 – 1/50 by the LCUa before being measured by PTR-TOF-MS.

The OH reactivity (the inverse of the OH radical lifetime) was measured with a laser photolysis-laser induced fluorescence (LP-LIF) instrument<sup>5,6</sup>.

**Supplementary Information Table 1 | SAPHIR experiment conditions.**

| Date       | Injection                                                          | HOCH <sub>2</sub> OH<br>(max.) | HOCH <sub>2</sub> OH + HCHO<br>(max.) | Oxidation                                                                       | Purpose                 |
|------------|--------------------------------------------------------------------|--------------------------------|---------------------------------------|---------------------------------------------------------------------------------|-------------------------|
| 2018-04-07 | Spraying HCHO <sub>(aq)</sub> by aerosol generator                 | 8 ppb                          | 39 ppb                                | $4 \times 10^6 \text{ cm}^{-3}$ OH                                              | HCOOH formation         |
| 2018-04-09 | Pyrolysis of para-HCHO                                             | 0 ppb                          | 28 ppb                                | $2 \times 10^6 \text{ cm}^{-3}$ OH                                              | Reference               |
| 2018-04-10 | Spraying HCHO <sub>(aq)</sub> by aerosol generator                 | 10.5 ppb                       | 42 ppb                                | UV-Lights<br>$7 \times 10^6 \text{ cm}^{-3}$ OH                                 | HCOOH formation         |
| 2018-06-28 | Syringe injection of Formalin-Solution (37% HCHO <sub>(aq)</sub> ) | 9 ppb                          | 20 ppb                                |                                                                                 | HCOOH formation         |
| 2018-07-13 | Syringe injection of Formalin-Solution (37% HCHO <sub>(aq)</sub> ) | 18 ppb                         | 33 ppb                                | $7 \times 10^6 \text{ cm}^{-3}$ OH<br>250 ppm CO, no OH (2 <sup>nd</sup> phase) | HCOOH formation w/wo CO |

## **b. Model calculations**

Model calculations were performed using the Master Chemical Mechanism (MCM) in its latest version 3.3.1 (<http://mcm.leeds.ac.uk/MCM/>). The model was constrained to measured values of temperature, pressure and OH concentration. Photolysis frequencies were calculated from the measured actinic flux. Injections of formaldehyde, methanediol and CO were modelled as sources being present during the times of injection.

The chamber source of formic acid was modelled as a continuous source during times of the experiment, when the chamber air was exposed to sunlight. The source strength was adjusted to match the observed increase of formic acid during times when OH was not present, i.e. when formic acid was not chemically produced from the reaction of methanediol with OH. This was the case, when the chamber roof was closed before the injection of formaldehyde and methanediol, and after the injection of excess CO as OH scavenger. Both periods give consistent source strengths. The uncertainty of the source strength was determined from sensitivity model runs, for which the value was varied:

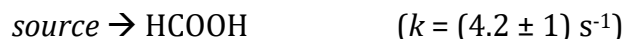

This gives an increase of formic acid of approximately 0.6 ppbv hour<sup>-1</sup>.

After the injection of formaldehyde and methanediol, methanediol concentrations immediately decrease also under dark conditions, when no chemical reaction of methanediol is expected. A decrease in the concentration is also observed after CO has been injected as OH scavenger. At the same time formaldehyde concentrations increase. To account for this, a conversion reaction of methanediol that produces formaldehyde is implemented. The conversion rate constant is adjusted such that to match the decrease of methanediol in the absence of OH. Sensitivity model runs were used to determine the uncertainty of this approach:

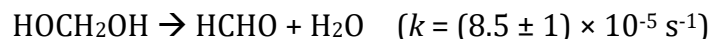

In addition, the reaction of methanediol and OH was added to the MCM. The reaction rate constant was adjusted to match the faster decrease of methanediol in the presence of OH after the chamber was opened and before CO was injected (see SI Sect. 1.c). The best match is achieved using a reaction rate constant of  $k = 7.5 \times 10^{-12} \text{ cm}^3 \text{ s}^{-1}$  (SI Fig. 1):

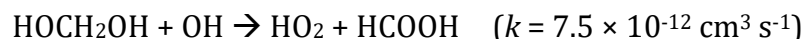

The uncertainty of the reaction rate constant was determined by varying its value in sensitivity model and adjusting the chamber source strength for formic acid and the conversion reaction rate constant of methanediol, such that measured concentrations of methanediol, formaldehyde and formic acid are matched. This results in a range for its value between 1 and  $10 \times 10^{-12} \text{ cm}^3 \text{ s}^{-1}$ , for which all observations are described by the model within 5%.

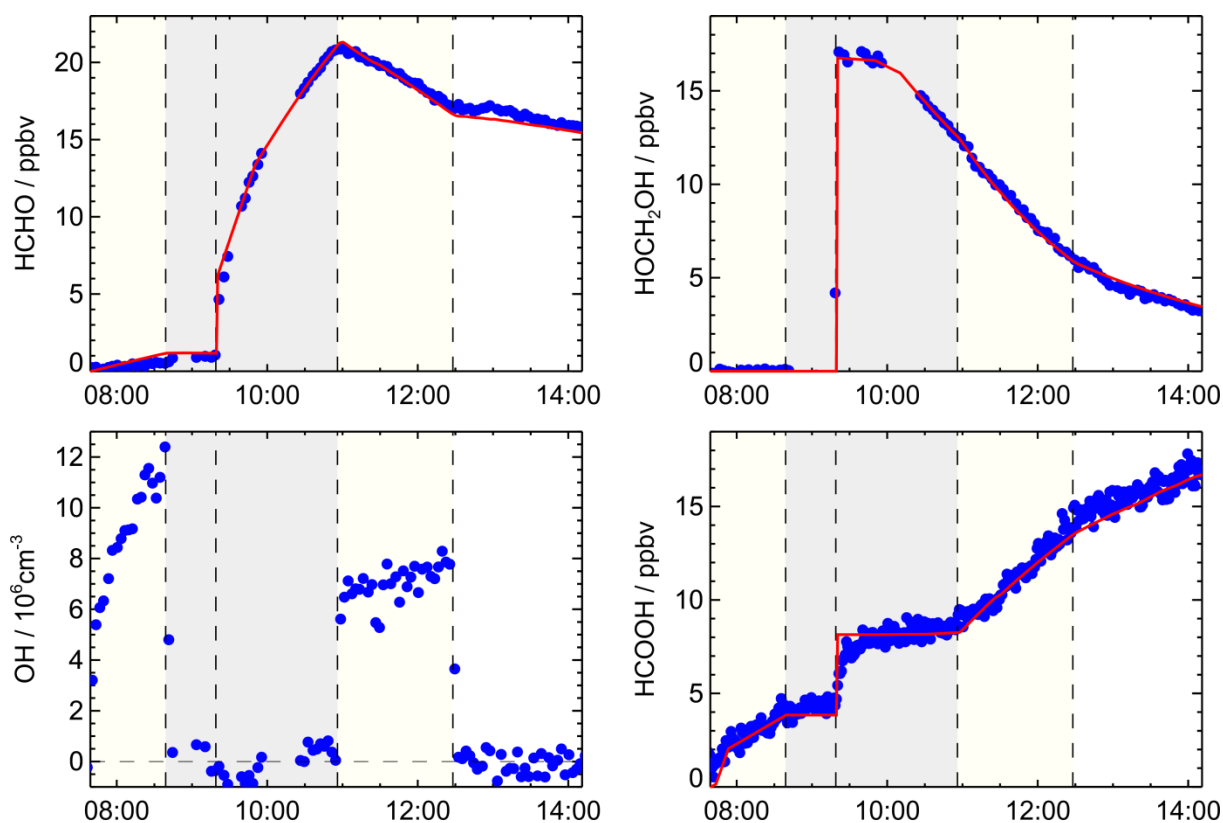

**Supplementary Information Figure 1 | Experiment in the chamber SAPHIR.** Time series of measured HCHO, HOCH<sub>2</sub>OH, HCOOH and OH (blue dots) together with results from chemical box modelling (red lines) during an experiment in the simulation outdoor chamber SAPHIR. Grey shaded areas indicate conditions without sunlight and white areas indicate times when excess CO was present as OH scavenger.

### c. Experimental determination of the rate coefficient between methanediol and OH radicals

The rate coefficient for the reaction of methanediol with OH radicals was determined experimentally for two different experiments in the SAPHIR chamber. In the initial phase of the first experiment (SI Fig. 2) before the injection of formalin, there is a small OH reactivity (up to 2 s<sup>-1</sup>) which is due to the trace gases generated from the wall. After the contribution of the measured trace gases is removed from the OH reactivity, an average 0.5 s<sup>-1</sup> missing reactivity remained. After the injection of formalin, the largest fraction of OH reactivity is due to formaldehyde, methanol and acetaldehyde. After removing the missing reactivity observed before injection of formalin, the remainder reactivity observed, on average  $1.6 \pm 0.25$  s<sup>-1</sup>, was assigned to the reaction between methanediol and OH radicals. The concentration of methanediol was obtained from the difference between the Hantzsch and the DOAS measurements and it was, on average,  $7.3(\pm 3.2) \times 10^{10}$  cm<sup>-3</sup>. The rate coefficient for the reaction between methanediol and OH radicals ( $2.2(\pm 1.4) \times 10^{-11}$  cm<sup>3</sup> s<sup>-1</sup>) was then obtained from the ratio between the measured OH reactivity and the concentration of methanediol.

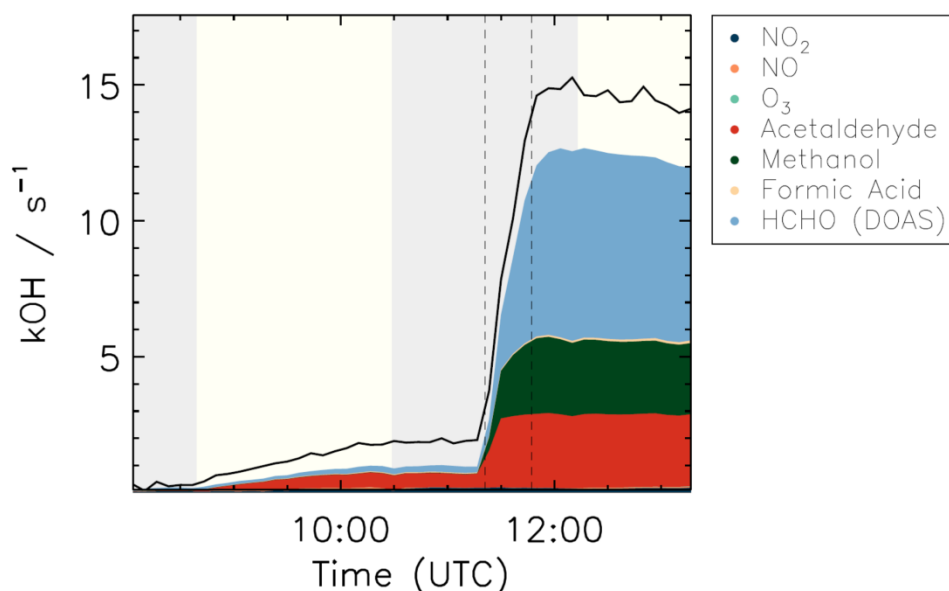

**Supplementary Information Figure 2 | Experiment with sunlight.** The yellow areas denote the time when the chamber roof was open. The vertical dashed lines indicate the injection of the formalin solution in the chamber.

The second experiment analysed (SI Fig. 3) was characterized by the use of UV-lamps to produce the OH radicals in the chamber instead of sunlight. This resulted in a negligible formation of trace gases from the chamber wall. The difference between the measured and the calculated OH reactivity after the injection of formalin (on average  $0.5 \pm 0.3 \text{ s}^{-1}$ ) was used to determine the rate coefficient for the reaction between methanediol and OH radical, which is  $1.8(\pm 1.2) \times 10^{-11} \text{ cm}^3 \text{ s}^{-1}$ . Although the determined rate coefficients carry a large uncertainty due to the small residual OH reactivity used for the calculation (still larger than the limit of detection of the instrument<sup>1</sup>,  $0.2 \text{ s}^{-1}$ ), they agree with each other and they are consistent with the value determined with the model calculation.

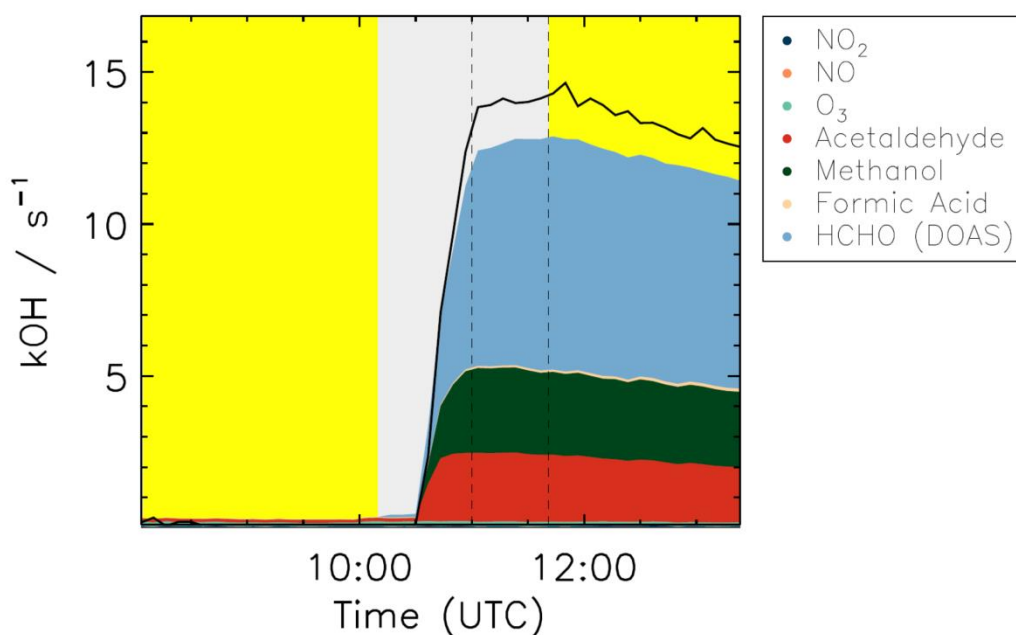

**Supplementary Information Figure 3 | Experiment with UV-lamps.** The yellow areas denote the time when the UV-lamps were on. The vertical dashed lines indicate the injection of the formalin solution in the chamber.

## 2. Theoretical calculations

### a. Methodology

#### *i. Quantum chemical calculations*

The geometries of all reactants, products, intermediates, complexes and transition states are first optimized at the M06-2X/aug-cc-pVDZ and M06-2X/aug-cc-pVTZ levels of theory<sup>7-10</sup>, using an integration grid of 99 radial shells and 590 angular points ('ultrafine'). For those structures that could have multiple conformers, an exhaustive search was performed, sampling the conformer space by starting optimizations at a large number of initial geometries, as appropriate for the degrees of freedom allowing for distinct conformers. All compounds and their distinct conformers thus found were re-optimized at the M06-2X/aug-cc-pVQZ level of theory, with a vibrational analysis at the same level of theory, in all cases using an integration grid of 175 radial shells and 974 angular points ('superfine'). The relative energy was further improved by a set of CCSD(T)/aug-cc-pVxZ single point energy calculations (x = D, T, Q)<sup>11</sup>, and the obtained energies extrapolated to the complete basis set limit using the aug-Schwartz6 scheme introduced by Ref. <sup>12</sup>; we refer to this methodology as CCSD(T)/CBS(DTQ).

For the transition states of the methanediol (denoted by CH<sub>2</sub>(OH)<sub>2</sub> in this section) + OH and C•H(OH)<sub>2</sub> + O<sub>2</sub> reactions, IRC calculations were additionally performed at the M06-2X/aug-cc-pVQZ level of theory using small steps of 0.5 Bohr, to ascertain the reaction path. These IRC pathways were then used to perform IRCMax calculations<sup>13</sup>, where the optimal geometry was located using CCSD(T)/aug-cc-pVTZ single point calculations on geometries along the M06-2X IRC path. On the selected geometry, we then performed CCSD(T)/CBS(DTQ) energy calculations as described above; these are considered to be the best available activation barriers for the CH<sub>2</sub>(OH)<sub>2</sub> + OH reaction. The IRC energy profile was also improved by an extensive set of single point CCSD(T)/aug-cc-pVTZ calculation along the IRC path; the resulting energy profile is used in tunneling calculations (see below). The barrierless complexation reaction was characterized by a set of constrained geometry optimizations with frequency analysis at the M06-2X/aug-cc-pVQZ level of theory, for distances between the CH<sub>2</sub>(OH)<sub>2</sub> and OH reactions spanning 3.5 to 8.5 Å.

All calculations were performed using the Gaussian-09 and Gaussian-16 quantum chemistry software suite<sup>14, 15</sup>.

#### *ii. Theoretical kinetic calculations*

As for methanol (CH<sub>3</sub>OH) + OH, the rate coefficient of the CH<sub>2</sub>(OH)<sub>2</sub> + OH reaction shows a very complex temperature dependence, owing to the presence of the pre-reactive complex, the competition between redissociation of the complex versus H-abstraction, the energy-specific impact of tunneling, and the lack of a clear saddle point in the barrierless complexation of the reactants; we refer to the theoretical section in Ref. <sup>16</sup> for a more in-depth discussion of these aspects.



In this work, we employ a similar methodology as in Ref. <sup>16</sup> for CH<sub>3</sub>OH + OH, following the same reaction scheme and naming:

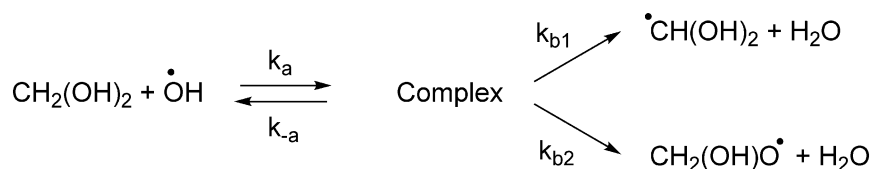

The total rate coefficient is calculated from capture rate coefficient for complexation,  $k_a$ , followed by either redissociation to the reactants,  $k_{-a}$ , or by H-abstraction from the carbon atom,  $k_{b1}$ , or oxygen atom,  $k_{b2}$  :

$$k_{\text{HPL}}(T) = k_a(T) \frac{k_{b1}(T) + k_{b2}(T)}{k_{b1}(T) + k_{b2}(T) + k_{-a}(T)}$$

The product yield  $Y_j(T)$  for product  $j$  ( $j=1$  for C•H(OH)<sub>2</sub> and 2 for CH<sub>2</sub>(OH)O•) is then given by the ratio  $Y_j(T) = k_{bj}(T)/\{k_{b1}(T)+k_{b2}(T)\}$ . The rate coefficient  $k_a(T)$  of the CH<sub>2</sub>(OH)<sub>2</sub>--OH complex formation is based on E,J-resolved micro-variational transition state theory calculations (E,J- $\mu$ VTST) in an RRHO approximation. The M06-2X/aug-cc-pVQZ data used in this analysis is expected to yield reasonable rate coefficients at the temperatures of interest in the atmosphere. At lower temperatures (<150 K), it is however expected that the current data set is unable to correctly predict the capture rate coefficient, and we refrain from making predictions in this low-temperature regime. The high-pressure rate coefficients  $k_{b1}(T)$  and  $k_{b2}(T)$  for reaction over a saddle point were calculated using multi-conformer canonical transition state theory (MC-CTST) in a rigid rotor harmonic oscillator (RRHO) approximation<sup>17</sup> using the M06-2X/aug-cc-pVQZ rovibrational characteristics and the (IRCMaX) CCSD(T)/CBS(DTQ)//M06-2X energies, augmented with conformer-specific zero-curvature WKB tunneling corrections based on the CCSD(T)/aug-cc-pVTZ//M06-2X IRC energy profiles. In the case of  $k_{-a}$ , the partition function is optimized in the aforementioned E,J-resolved  $\mu$ VTST calculations. For any of the elementary rate coefficient  $k_{-a}$ ,  $k_{b1}$  and  $k_{b2}$  we have then the following expression:

$$k_{\text{MC-TST}}(T) = \frac{kT}{h} \frac{\sum_i \kappa_i \cdot Q_i^\ddagger(T) \exp\left(\frac{-E_i}{kT}\right)}{\sum_i Q_i^{\text{complex}}(T) \exp\left(\frac{-E_i}{kT}\right)} \exp\left(\frac{-E_b}{kT}\right)$$

where  $Q_i$  are the conformer-specific partition functions for conformer  $i$  at energy  $E_i$  relative to the lowest conformer, and  $E_b$  is the energy difference between the complex ground state and the lowest TS conformer. The WKB tunneling corrections  $\kappa_i$  are only calculated explicitly for the dominant conformers (see above); the remaining conformers are assigned averaged tunneling corrections. Note that in the  $k_{\text{HPL}}(T)$  expression, the partition function and relative energy of the complex cancels out. The rate coefficient near room temperature is strongly influenced by redissociation of the complex back to the separated reactants. At these intermediate temperatures, a fair approximation would have been to assume an equilibrium between free reactants and the complex, describing the kinetics as a set of direct reactions from free reactants to the H-abstraction transition state. The lifetime of the complex near room temperature is comparatively short,  $\sim 10^{-11}$  s, and at atmospheric pressures the rate coefficient might be influenced by pressure; as discussed in Ref. <sup>16</sup>, the influence is not expected to be significant and is thus not considered here.

**b. The site-specific rate coefficients for methanediol + OH**

The methanediol + OH reaction is similar to the CH<sub>3</sub>OH + OH reaction<sup>16, 18, 19</sup>, with two main channels of attack, i.e. H-abstraction from the carbon atom or the oxygen atoms. An S<sub>N</sub>2-type substitution mechanism forming methanetriol was found to have a large barrier (see SI Tab. 2) and can be neglected.

Methanediol has been amply described in the literature (e.g., Refs <sup>20-22</sup>) and needs not to be discussed in detail. The main feature is the ground state of C<sub>2</sub> symmetry, of which two enantiomers exist. Geometries with other orientations of the hydroxyl H-atoms have significantly higher energies, with contributions to the room temperature population of only a few percent. Several different pre-reaction complexes of methanediol and OH exist; in our kinetic analysis we are not sensitive to the exact stability or state density of these complexes, as these parameters mostly cancel out of the kinetic equations in the high-pressure limit (see above).

**Supplementary Information Table 2 | Relative energies (E<sub>rel</sub> / kcal mol<sup>-1</sup>) of the reactants, pre-reactive complex, and transition states for the CH<sub>3</sub>OH + OH elementary reaction.** Unless indicated otherwise, the energies are at the CCSD(T)/CBS(DTQ)//IRCMax(CCSD(T)/aug-cc-pVTZ//M06-2X/aug-cc-pVQZ) level of theory. CH<sub>3</sub>OH + OH data are from Ref. <sup>16</sup>; CH<sub>4</sub> + OH data are from Ref. <sup>23</sup>.

| Compound                                                                                    | Conformer   | E <sub>rel</sub>  |
|---------------------------------------------------------------------------------------------|-------------|-------------------|
| CH <sub>2</sub> (OH) <sub>2</sub> + OH                                                      | most stable | 0.00              |
| Complex CH <sub>2</sub> (OH) <sub>2</sub> --- OH                                            | most stable | -5.22             |
| TS CH <sub>2</sub> (OH) <sub>2</sub> + OH → C•H(OH) <sub>2</sub> + H <sub>2</sub> O (R1a)   | <i>ppl</i>  | 0.81              |
|                                                                                             | <i>tmt</i>  | 1.50              |
|                                                                                             | <i>ptm</i>  | 1.63              |
|                                                                                             | <i>mmc</i>  | 1.71 <sup>a</sup> |
|                                                                                             | <i>mtp</i>  | 3.07 <sup>a</sup> |
| TS CH <sub>2</sub> (OH) <sub>2</sub> + OH → CH <sub>2</sub> (OH)O• + H <sub>2</sub> O (R1b) | <i>mmt</i>  | 3.03              |
|                                                                                             | <i>mtt</i>  | 4.75 <sup>b</sup> |
|                                                                                             | <i>mtl</i>  | 5.00 <sup>b</sup> |
|                                                                                             | <i>tmm</i>  | 5.07 <sup>b</sup> |
|                                                                                             | <i>tpl</i>  | 5.45 <sup>b</sup> |
| TS CH <sub>2</sub> (OH) <sub>2</sub> + OH → CH(OH) <sub>3</sub> + H (R1c)                   |             | 44.04             |
| CH <sub>3</sub> OH + OH                                                                     |             | 0.00              |
| TS CH <sub>3</sub> OH + OH → C•H <sub>2</sub> OH + H <sub>2</sub> O                         | most stable | 0.98              |
| TS CH <sub>3</sub> OH + OH → CH <sub>3</sub> O• + H <sub>2</sub> O                          | most stable | 3.13              |
| CH <sub>4</sub> + OH                                                                        |             | 0.00              |
| TS CH <sub>4</sub> + OH → C•H <sub>3</sub> + H <sub>2</sub> O                               |             | 6.22 <sup>c</sup> |

<sup>a</sup> estimated from the CCSD(T)/CBS(DTQ)//M06-2X/aug-cc-pVQZ energies and the average impact of applying IRCMax refinements on the barrier height.

<sup>b</sup> derived from M06-2X/aug-cc-pVQZ energies relative to the most stable TS conformer *mmt*.

<sup>c</sup> W1 energy<sup>23</sup>.

For each of the abstraction transition states, we located multiple conformers, where 3 out of 5 non-symmetry-related geometries contribute strongly ( $\sim 90\%$  at 300 K) to the C-H abstraction TS, and 1 geometry out of 5 ( $\sim 80\%$  at 300 K) to the O-H abstraction TS (see SI Tab. 2). Interestingly, according to our calculations, having two hydroxyl groups on the carbon does not lower the barrier height significantly compared to  $\text{CH}_3\text{OH} + \text{OH}$ , whereas the single hydroxyl group in methanol causes the barrier height of  $\text{CH}_3\text{OH} + \text{OH}$  to be significantly reduced compared to  $\text{CH}_4 + \text{OH}$  (SI Tab. 2). The pathways through the distinct TS conformers do not necessarily connect directly to the most stable pre-reaction or post-reaction complex geometry; this can affect the predicted rate coefficient by limiting the energy range accessible for tunneling for each particular TS conformer. As indicated above, we calculate conformer-specific tunneling based on explicit IRC pathway calculations of the dominant conformers, to account for these differences.

The obtained temperature-dependent effective rate coefficient and product distribution is listed in SI Tab. 3, and plotted in SI Fig. 4. The theoretical data favors the lower end of the rate coefficient range of the experimental analysis (see SI Sect. 1). Indeed, the calculated rate coefficient for the methanediol + OH reaction is about a factor of 7 lower than what is obtained by fitting the observed concentrations in the SAPHIR experiments. Accounting for the uncertainty on barrier height, tunneling, and state density suggests an uncertainty on the theoretical predictions of a factor 3; for comparison, our analogous analysis of the  $\text{CH}_3\text{OH} + \text{OH}$  reaction was able to reproduce the best available experimental data within a factor of 1.6 across the 20-400 K temperature range. Despite the apparent large difference in  $k(T)$  value, experiment and theory have thus overlapping uncertainty intervals. However, we cannot exclude that part of the difference is caused by effects not included in the theoretical analysis, such as complexation with water, or catalysis by available co-reactants or the chamber wall.

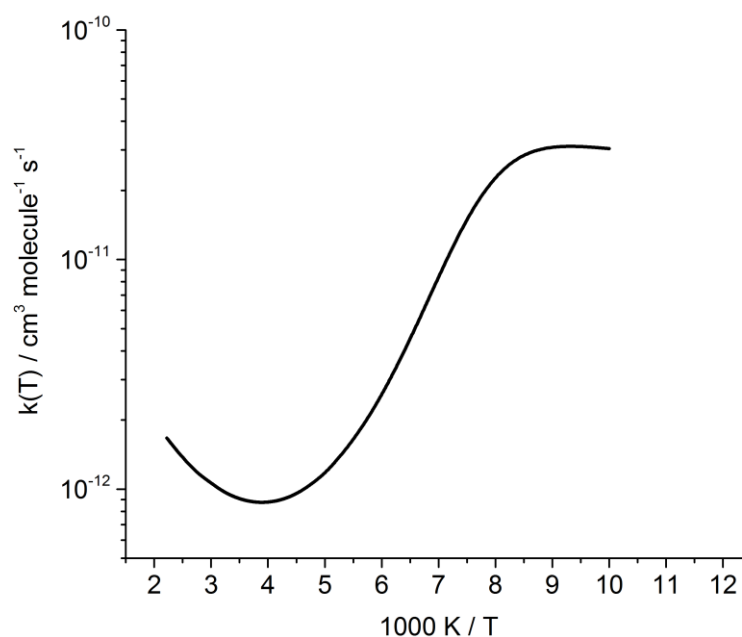

**Supplementary Information Figure 4 | Theoretically predicted rate coefficient  $k(T)$  for the  $\text{CH}_2(\text{OH})_2 + \text{OH}$  reaction.**

**Supplementary Information Table 3 | Theoretically predicted rate coefficient  $k(T)$ , and product distribution  $Y(T)$ , for the  $\text{CH}_2(\text{OH})_2 + \text{OH}$  reaction.**

| T / K | $k(T) / \text{cm}^3 \text{s}^{-1}$ | $Y(\text{C}\cdot\text{H}(\text{OH})_2)$ | $Y(\text{CH}_2(\text{OH})\text{O}\cdot)$ |
|-------|------------------------------------|-----------------------------------------|------------------------------------------|
| 150   | $5.50 \times 10^{-12}$             | 0.61                                    | 0.39                                     |
| 160   | $3.35 \times 10^{-12}$             | 0.70                                    | 0.30                                     |
| 170   | $2.28 \times 10^{-12}$             | 0.77                                    | 0.23                                     |
| 180   | $1.71 \times 10^{-12}$             | 0.82                                    | 0.18                                     |
| 190   | $1.38 \times 10^{-12}$             | 0.86                                    | 0.14                                     |
| 200   | $1.17 \times 10^{-12}$             | 0.88                                    | 0.12                                     |
| 210   | $1.05 \times 10^{-12}$             | 0.90                                    | 0.10                                     |
| 220   | $9.68 \times 10^{-13}$             | 0.92                                    | 0.08                                     |
| 230   | $9.18 \times 10^{-13}$             | 0.93                                    | 0.07                                     |
| 240   | $8.90 \times 10^{-13}$             | 0.94                                    | 0.06                                     |
| 250   | $8.77 \times 10^{-13}$             | 0.94                                    | 0.06                                     |
| 260   | $8.75 \times 10^{-13}$             | 0.95                                    | 0.05                                     |
| 270   | $8.83 \times 10^{-13}$             | 0.95                                    | 0.05                                     |
| 280   | $8.97 \times 10^{-13}$             | 0.96                                    | 0.04                                     |
| 290   | $9.18 \times 10^{-13}$             | 0.96                                    | 0.04                                     |
| 300   | $9.44 \times 10^{-13}$             | 0.96                                    | 0.04                                     |
| 310   | $9.74 \times 10^{-13}$             | 0.96                                    | 0.04                                     |
| 320   | $1.01 \times 10^{-12}$             | 0.96                                    | 0.04                                     |
| 330   | $1.05 \times 10^{-12}$             | 0.96                                    | 0.04                                     |
| 340   | $1.09 \times 10^{-12}$             | 0.97                                    | 0.03                                     |
| 350   | $1.13 \times 10^{-12}$             | 0.97                                    | 0.03                                     |
| 360   | $1.17 \times 10^{-12}$             | 0.97                                    | 0.03                                     |
| 370   | $1.22 \times 10^{-12}$             | 0.97                                    | 0.03                                     |
| 380   | $1.27 \times 10^{-12}$             | 0.97                                    | 0.03                                     |
| 390   | $1.32 \times 10^{-12}$             | 0.97                                    | 0.03                                     |
| 400   | $1.38 \times 10^{-12}$             | 0.97                                    | 0.03                                     |
| 410   | $1.43 \times 10^{-12}$             | 0.97                                    | 0.03                                     |
| 420   | $1.49 \times 10^{-12}$             | 0.97                                    | 0.03                                     |
| 430   | $1.55 \times 10^{-12}$             | 0.97                                    | 0.03                                     |
| 440   | $1.61 \times 10^{-12}$             | 0.97                                    | 0.03                                     |
| 450   | $1.67 \times 10^{-12}$             | 0.97                                    | 0.03                                     |
| 460   | $1.74 \times 10^{-12}$             | 0.97                                    | 0.03                                     |
| 470   | $1.80 \times 10^{-12}$             | 0.97                                    | 0.03                                     |
| 480   | $1.86 \times 10^{-12}$             | 0.97                                    | 0.03                                     |
| 490   | $1.93 \times 10^{-12}$             | 0.97                                    | 0.03                                     |
| 500   | $2.00 \times 10^{-12}$             | 0.97                                    | 0.03                                     |

### **c. The products of the methanediol + OH reaction in the atmosphere**

As discussed above, the  $\text{CH}_2(\text{OH})_2 + \text{OH}$  reaction has two accessible channels: H-abstraction from the carbon atom, or from an oxygen atom. In this section, we present a set of theoretical calculations looking at the subsequent reactions of the products of these elementary reactions, showing that the only product formed in non-negligible quantities is formic acid ( $\text{HCOOH}$ ), with coproduct  $\text{HO}_2$ , though this does not imply a direct reaction. The dominant product formation in atmospheric conditions then follows the following reaction scheme:

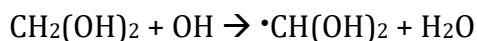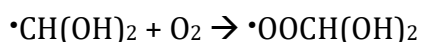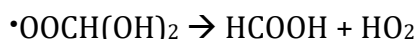

All energies discussed in this section were calculated at the CCSD(T)/CBS(DTQ) // M06-2X/aug-cc-pVQZ level of theory, unless indicated otherwise.

#### *i. After H-abstraction from the carbon atom*

The initiation reaction with the lowest barrier is abstraction from the carbon atom, with a predicted barrier of  $0.81 \text{ kcal mol}^{-1}$ :

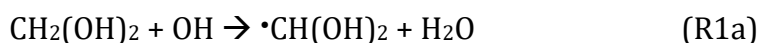

For the dihydroxy-methyl radical formed,  $\text{C}\cdot\text{H}(\text{OH})_2$ , nine reactions were examined, listed in SI Tab. 4. Most of these reactions have either a high barrier to reaction, or are strongly endothermic, making these reactions negligible even for chemically activated  $\text{C}\cdot\text{H}(\text{OH})_2$  possibly formed in reaction R1a. Under atmospheric conditions, with a partial pressure of  $\text{O}_2$  of  $\sim 0.2$  bar, the dominant loss reaction will then be direct H-abstraction, forming  $\text{HCOOH} + \text{HO}_2$ , or formation of dihydroxymethylperoxy,  $\cdot\text{OOCH}(\text{OH})_2$ , through a near-barrierless reaction path.

The formation of  $\cdot\text{OOCH}(\text{OH})_2$  is highly exothermic, enabling fast unimolecular decomposition of the peroxy radical to  $\text{HCOOH} + \text{HO}_2$ . The mechanism is identical to that of other  $\alpha$ -hydroxy alkyl radicals +  $\text{O}_2$ , whose chemistry has been described in detail<sup>24-35</sup>. The potential energy surface for  $\cdot\text{OOCH}(\text{OH})_2$  is shown in SI Fig. 5, where we find that energetics are similar to those predicted by Ref. <sup>33</sup> for a range of  $\alpha$ -hydroxy peroxy radicals, except that the complex of formic acid with  $\text{HO}_2$  is significantly stronger than for carbonyl compounds, as expected, and that the formic acid product is somewhat more stable than the carbonyl compounds formed from mono-hydroxylated peroxy radicals. It should be noted that the lifetime of the chemically activated  $\cdot\text{OOCH}(\text{OH})_2$  formed in the  $\text{C}\cdot\text{H}(\text{OH})_2 + \text{O}_2$  reaction is too short to allow bimolecular reactions. Technically, formic acid and  $\text{HO}_2$  establish an equilibrium with their complex and with the  $\cdot\text{OOCH}(\text{OH})_2$  radicals, and thus enable bimolecular reactions of  $\cdot\text{OOCH}(\text{OH})_2$ ; this equilibrium is shifted strongly to the free fragments, however, and will not have appreciable impact except at very low temperatures such as those found near the tropopause.

**Supplementary Information Table 4 | Barrier heights and reaction energies for reactions of importance in the product formation in the methanediol + OH system.**

| Reaction                                                                                                   |        | $E_b$ / kcal mol <sup>-1</sup> | $E_{\text{react}}$ / kcal mol <sup>-1</sup> |
|------------------------------------------------------------------------------------------------------------|--------|--------------------------------|---------------------------------------------|
| $\text{C}\cdot\text{H}(\text{OH})_2 + \text{O}_2 \rightarrow \cdot\text{OOCH}(\text{OH})_2$                | (R2)   | [low] <sup>a</sup>             | -39.4                                       |
| $\text{C}\cdot\text{H}(\text{OH})_2 + \text{O}_2 \rightarrow \text{HCOOH} + \text{HO}_2$                   | (R3)   | 3.6 <sup>b</sup>               | -47.3                                       |
| $\text{C}\cdot\text{H}(\text{OH})_2 \rightarrow \text{HCOOH} + \text{H}$                                   | (R4)   | 24.8                           | 10.3                                        |
| $\text{C}\cdot\text{H}(\text{OH})_2 \rightarrow \cdot\text{OCH}_2\text{OH}$                                | (R5)   | 34.1                           | 9.3                                         |
| $\text{C}\cdot\text{H}(\text{OH})_2 + \text{H}_2\text{O} \rightarrow \text{CH}_2(\text{OH})_2 + \text{OH}$ | (R-1a) |                                | 22.7                                        |
| $\text{C}\cdot\text{H}(\text{OH})_2 \rightarrow {}^3\text{C}(\text{OH})_2 + \text{H}$                      | (R6)   |                                | 110.8                                       |
| $\text{C}\cdot\text{H}(\text{OH})_2 \rightarrow {}^1\text{C}(\text{OH})_2 + \text{H}$                      | (R7)   |                                | 52.0                                        |
| $\text{C}\cdot\text{H}(\text{OH})_2 \rightarrow {}^3\text{CHOH} + \text{OH}$                               | (R8)   |                                | 108.5                                       |
| $\text{C}\cdot\text{H}(\text{OH})_2 \rightarrow {}^1\text{CHOH} + \text{OH}$                               | (R9)   |                                | 87.5                                        |

<sup>a</sup> No saddle point was located for this channel; the reaction is assumed to be near-barrierless, by analogy with other alkyl + O<sub>2</sub> addition reactions

<sup>b</sup> Based on IRCMax(CCSD(T)/aug-cc-pVTZ//M06-2X/aug-cc-pVQZ) geometries. The TS for direct H-abstraction has a very high multi-reference characters (T1 diagnostic > 0.06) and the result should be considered unreliable.

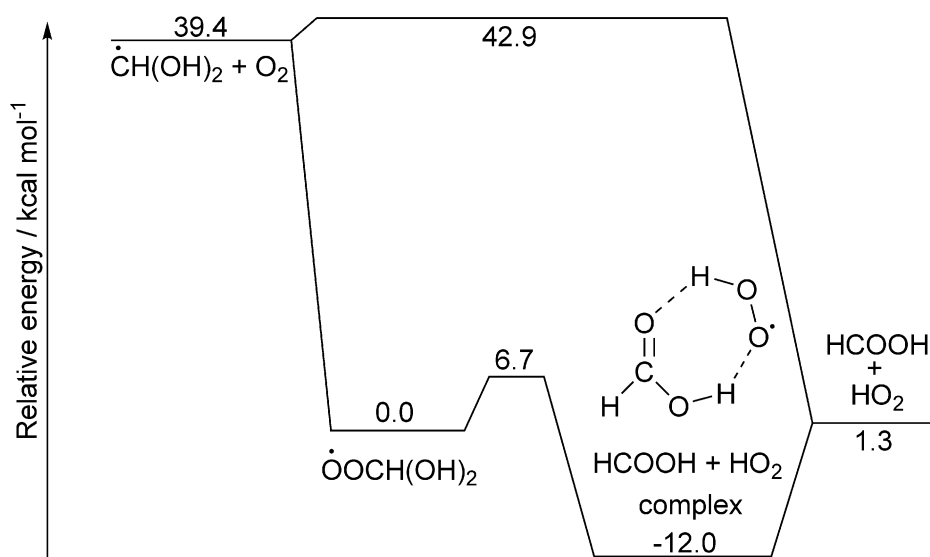**Supplementary Information Figure 5 | ZPE-corrected potential energy surface for the dihydroxymethyl + O<sub>2</sub> reaction.**

## ii. After H-abstraction from the oxygen atom

The initiation reaction where an H-atom is abstracted from methanediol has a predicted energy barrier of 3.03 kcal mol<sup>-1</sup>:

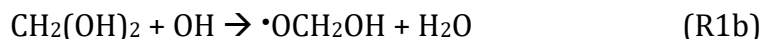

For the dihydroxy-methyl radical formed, CH<sub>2</sub>(OH)O•, four reactions were examined, listed in SI Table 5. Most of these reactions have either a sizable barrier to reaction, or are strongly endothermic, making these reactions less important even for chemically activated •OCH<sub>2</sub>OH possibly formed in reaction R1b. Under atmospheric conditions, with a partial pressure of O<sub>2</sub> of ~0.2 bar, the dominant loss reaction will be H-abstraction by O<sub>2</sub>, with an energy barrier predicted to be below 6 kcal mol<sup>-1</sup>. Direct unimolecular H-atom elimination can not be fully excluded, especially if highly energized hydroxymethoxy radicals are formed, but under atmospheric conditions this will lead to the same final products, HCOOH + HO<sub>2</sub>.

**Supplementary Information Table 5 | Reactions of the hydroxymethoxy radical formed from methanediol + OH.**

| Reaction                                                        |       | E <sub>b</sub> / kcal mol <sup>-1</sup> | E <sub>react</sub> / kcal mol <sup>-1</sup> |
|-----------------------------------------------------------------|-------|-----------------------------------------|---------------------------------------------|
| •OCH <sub>2</sub> OH + O <sub>2</sub> → HCOOH + HO <sub>2</sub> | (R10) | 5.93                                    | -47.3                                       |
| •OCH <sub>2</sub> OH → HCOOH + H                                | (R11) | 12.0                                    | 1.1                                         |
| •OCH <sub>2</sub> OH → HCHO + OH                                | (R12) |                                         | 22.0                                        |
| •OCH <sub>2</sub> OH → C•H(OH) <sub>2</sub>                     | (R-5) |                                         | 24.9                                        |

### 3. Model simulations

#### a. BASE simulation

##### i. Gas-phase kinetics

The chemical mechanism including the oxidation of organic compounds is implemented in the submodel MECCA<sup>36</sup> and referred to as the Mainz Organic Mechanism (MOM)<sup>37</sup>. It is available in the EMAC v2.53.0 release<sup>38</sup>. The employed configuration does not represent formation of Secondary Organic Aerosol (SOA). However, SOA formation from isoprene is approximated by assuming that the fraction of isoprene hydroperoxides (ISOPOOH) which does not yield epoxydiols (IEPOX) upon reaction with OH is removed. This is consistent with Ref. <sup>39</sup>. SOA formation via reactive uptake of IEPOX and cloud processing of dicarbonyls is currently neglected. Representation of these processes could significantly lower the formic acid (HCOOH) yield from isoprene oxidation both directly and indirectly.

Formic acid production in MOM takes place via four pathways:

- a) Ozonolysis of unsaturated organics, primary and secondary, which yields the stabilized Criegee Intermediate (CH<sub>2</sub>OO) that mainly forms hydroxymethyl hydroperoxide (HOCH<sub>2</sub>OOH) upon reaction with the water monomer and dimer, which then degrades to HCOOH following:

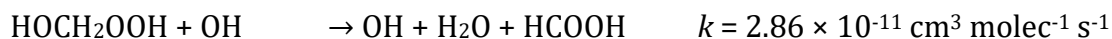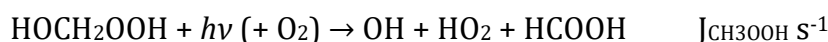

- b) HO<sub>2</sub>-initiated oxidation of formaldehyde (HCHO) at low-temperature according to the [IUPAC recommendations](#) (sheets HO<sub>x</sub>\_VOC58 and HO<sub>x</sub>\_VOC59) for the initial steps:

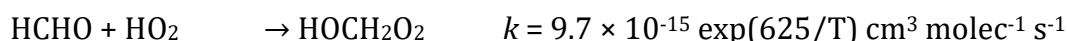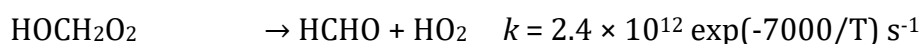

- c) OH-initiated oxidation of acetylene (HC≡CH) according to Table 2-1 (D4) of [JPL recommendations](#):

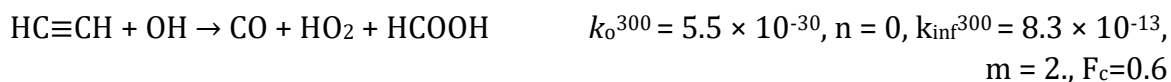

- d) OH-initiated oxidation of vinyl alcohol (H<sub>2</sub>C=CHOH) according to Ref. <sup>40</sup>

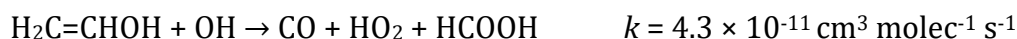

Vinyl alcohol is mainly produced by the photo-induced keto-enol tautomerization of acetaldehyde (CH<sub>3</sub>CHO)<sup>41, 42</sup>

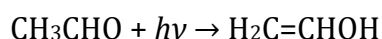

Other sources of vinyl alcohol are photolysis of *n*-butanal and pyruvic acid according to Ref. <sup>43</sup>. The theoretical catalytic effect of formic acid in the conversion between acetaldehyde and vinyl alcohol is implemented according to Ref. <sup>44</sup>.



The speculative formic acid production from enols larger than vinyl alcohol is not included in MOM. In particular, MOM as well as MCM v3.3.1 contains the species HMAc and HVmK, which are enols. MOM consequently has formic acid production from their reaction with OH. However, since the production of HMAc and HVmK from isoprene is speculative, the respective reaction products assigned by MCM v3.3.1 are used here.

## *ii. Emissions*

Biogenic emissions of organics like isoprene have a strong influence on the atmospheric composition but are rather uncertain<sup>45</sup>. Despite the overall underestimate of formic acid in the troposphere, the standard EMAC model with the MEGAN2 emission algorithm<sup>46</sup> produces 591 Tg yr<sup>-1</sup> of isoprene leading to an overestimate of the formic acid total column over the Amazon. The implementation of the emission algorithm lacks the known reduction effect of soil moisture stress which is estimated to reduce isoprene emissions by as much as 50%<sup>45</sup>. Moreover, the EMAC model tends to overestimate the 2m temperature over the Amazon which lacks a realistic soil moisture memory effect due to its simple “bucket model” for the soil water. This leads to a significant overestimate of isoprene emissions which are strongly sensitive to light and temperature<sup>47</sup>. Given the uncertainties and issues described above, we reduced the isoprene emission factors by 50% and obtain a global isoprene emission of 382 Tg yr<sup>-1</sup> similar to the estimate obtained by Ref. <sup>45</sup> when soil moisture stress is accounted for.

The surface fluxes of formic acid are generally considered bi-directional with large upward fluxes occasionally inferred<sup>48, 49</sup>. MEGAN2 produces a small flux that is lower than 3 Tg yr<sup>-1</sup>. The corresponding emission factors are very uncertain<sup>46</sup>. Since we aim to an explicit representation of sources and sinks of formic acid, we turned off such emissions.

## *iii. Scavenging and dry deposition*

The equilibrium between the gas- and aqueous phase for formic acid is governed by its intrinsic Henry's law constant ( $H_{\text{HCOOH}}=8.9 \times 10^3 \text{ M atm}^{-1}$ ) and acidity constant ( $K_a = 1.8 \times 10^{-4} \text{ M}$ ) which are used in the scavenging routines. The effective Henry's law constants ( $H^*$ ) for acids are calculated according to the formula:

$$H^* = H \times (1 + K_a / [H^+])$$

For dry deposition, pH values of 7 and 8.14 for the leaf mesophyll and ocean water have been assumed, respectively. The corresponding  $H^*$  are calculated to be  $1.6 \times 10^7$  and  $2.2 \times 10^8 \text{ M atm}^{-1}$ , respectively. The surface reactivity parameter is set to 0. The scavenging of formaldehyde is computed with the  $H^*$  of  $3.2 \times 10^3 \text{ M atm}^{-1}$ , which takes into account the equilibrium with methanediol<sup>50</sup>.

The standard EMAC model has been modified with respect to the problematic representation of surface exchanges over the Amazon forest. In the dry season (September – November), the modelled soil moisture stress for stomatal conductance unrealistically shuts down stomatal dry deposition of trace gases. As a result, levels of ozone and oxygenated organics are significantly overestimated. This model deficiency also affects the evapotranspiration leading to positive temperature biases<sup>47</sup>. Improving the hydrological model is beyond the scope of this study. Moreover, also under non-limiting drought conditions, the modelled dry deposition

fluxes of major oxygenated organics is far below what is measured in the field. An example is hydroxymethyl hydroperoxide which is a main product of VOC ozonolysis and an important precursor of formic acid. Our modelled maximum deposition velocities are less than 2 cm s<sup>-1</sup> while the measured ones reach up to 5 cm s<sup>-1</sup> (see Ref. <sup>51</sup>). Thus, a series of changes to the EMAC dry deposition algorithm has been implemented and is detailed below.

The dry deposition scheme implemented in EMAC by Ref. <sup>52</sup> has been modified. The scheme effectively represents only stomatal deposition without meteorological controls by vapor pressure deficit and heat stress. The latter have been introduced as factors multiplying the stomatal conductance according to Refs <sup>53</sup>, <sup>54</sup>, respectively. The soil moisture stress factor which reduces stomatal conductance, and thus stomatal deposition, depends on a critical and wilting point as in second-generation hydrological models. However, the hydrological model implemented in ECHAM5 is essentially a “bucket” model and the original formula for the soil moisture stress factor by Ref. <sup>55</sup> has been re-introduced. This makes the stress factor assume more realistic values and slightly ameliorates the ECHAM5 problem of the too dry Amazon in the dry season. Moreover, the parameterization for the non-stomatal deposition under dry and wet conditions by Ref. <sup>56</sup> has been implemented. Finally, for the major oxygenated C<sub>1</sub>-C<sub>5</sub> organics artificially high effective Henry’s law coefficients have been implemented similarly to Ref. <sup>57</sup> in order to produce realistic deposition velocities like the ones reported by Ref. <sup>51</sup>.

Over the ocean dry deposition of formic acid is treated by a two-layer model fully described by Ref. <sup>58</sup>. As concentration in the ocean surface layer we took the average lower bound concentration of 500 nmol L<sup>-1</sup> of formate measured by Ref. <sup>59</sup>. At pH = 8.14 the corresponding formic acid concentration must be 2 nmol L<sup>-1</sup>.

## **b. DIOH and DIOL simulations**

### *i. Gas-phase kinetics*

Methanediol (HOCH<sub>2</sub>OH) in the gas phase reacts with OH as below

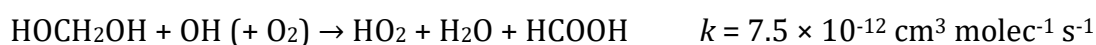

The rate constant is from the best fit of the box model results to the SAPHIR experimental time series of formic acid and methanediol (see SI Sect. 1.b). This is consistent with the independent determination of the rate constant using the OH reactivity measurements (see SI Sect. 1.c), but outside the range of values from the theoretical predictions (see SI Sect. 2.b). A more accurate determination of this rate constant is needed.

### *ii. Aqueous-phase kinetics*

The temperature-dependent equilibrium is considered explicitly in the aqueous-phase chemical mechanism as:

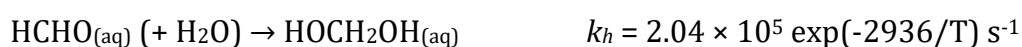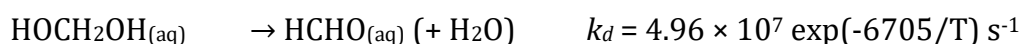

In order to account for the kinetically-limited dehydration and outgassing of aqueous-phase methanediol, in the reaction

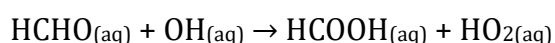

HCHO<sub>(aq)</sub> has been replaced by HOCH<sub>2</sub>OH<sub>(aq)</sub>.

The temperature range where most of the cloud-mediated formic acid production occurs is 260-300 K. However, the kinetic data used here for the hydration/dehydration of methanediol are derived from experiments in the 293-333 K range. Furthermore, it is known that acid catalysis of methanediol dehydration is important for solution pH < 3.5 (see Ref. <sup>60, 61</sup>). This is outside the typical pH range of cloud droplets which is entirely covered (pH 5-7) by the kinetic data we use in this study<sup>62</sup>. Specifically, Ref. <sup>62</sup> showed that the dehydration constant of methanediol did not change significantly (<13%) for the pH 6-7.5 range.

The full kinetic model is detailed in SI Tab. 6.

**Supplementary Information Table 6 | The kinetic model for the aqueous-phase oxidation of methanediol.**

k<sub>arr</sub> is the rate constant function  $A * \exp(B*(1/temp-1/298.15))$ . In blue are the new reactions added for the DIOH and DIOL simulations.

| Reaction                                            |                                                                                                 | Rate constant<br>[M <sup>-1</sup> s <sup>-1</sup> ] or [s <sup>-1</sup> ] | Reference          |
|-----------------------------------------------------|-------------------------------------------------------------------------------------------------|---------------------------------------------------------------------------|--------------------|
| HCHO + OH                                           | → HCOOH + HO <sub>2</sub>                                                                       | k <sub>arr</sub> (7.7E8,-1020.,temp)                                      | Ref. <sup>63</sup> |
| HCHO {+ H <sub>2</sub> O}                           | → HOCH <sub>2</sub> OH                                                                          | 2.04E5*EXP(-2936./temp)                                                   | Ref. <sup>62</sup> |
| HOCH <sub>2</sub> OH                                | → HCHO                                                                                          | 4.96E7*EXP(-6705./temp)                                                   | Ref. <sup>62</sup> |
| HOCH <sub>2</sub> OH + OH                           | → HCOOH + HO <sub>2</sub>                                                                       | k <sub>arr</sub> (7.7E8,-1020.,temp)                                      | Ref. <sup>63</sup> |
| HOCH <sub>2</sub> OH + CO <sub>3</sub>              | → HCO <sub>3</sub> <sup>-</sup> + HCOOH + HO <sub>2</sub>                                       | 1.3E4                                                                     | Ref. <sup>64</sup> |
| HOCH <sub>2</sub> OH + NO <sub>3</sub>              | → NO <sub>3</sub> <sup>-</sup> + H <sup>+</sup> + HCOOH + HO <sub>2</sub>                       | k <sub>arr</sub> (1.E6,-4500.,temp)                                       | Ref. <sup>65</sup> |
| HOCH <sub>2</sub> OH + SO <sub>4</sub> <sup>-</sup> | → SO <sub>4</sub> <sup>2-</sup> + HCOOH + HO <sub>2</sub>                                       | k <sub>arr</sub> (1.4E7,-1300.,temp)                                      | Ref. <sup>66</sup> |
| HOCH <sub>2</sub> OOH + OH                          | → HCOOH + OH                                                                                    | 6.3E8*0.20                                                                | Ref. <sup>67</sup> |
| HOCH <sub>2</sub> OOH + OH                          | → HCHO + HO <sub>2</sub>                                                                        | 6.3E8*0.80                                                                | Ref. <sup>67</sup> |
| HCOOH + OH                                          | → HO <sub>2</sub> + CO <sub>2</sub>                                                             | k <sub>arr</sub> (1.1E8, -991.,temp)                                      | Ref. <sup>63</sup> |
| HCOOH + NO <sub>3</sub>                             | → NO <sub>3</sub> <sup>-</sup> + Hp + HO <sub>2</sub> + CO <sub>2</sub>                         | k <sub>arr</sub> (3.8E5,-3400.,temp)                                      | Ref. <sup>65</sup> |
| HCOOH + SO <sub>4</sub> <sup>-</sup>                | → SO <sub>4</sub> <sup>2-</sup> + H <sup>+</sup> + HO <sub>2</sub> + CO <sub>2</sub>            | k <sub>arr</sub> (1.7E8,-1500.,temp)                                      | Ref. <sup>68</sup> |
| HCOO <sup>-</sup> + OH                              | → H <sub>2</sub> O + O <sub>2</sub> <sup>-</sup> + CO <sub>2</sub>                              | k <sub>arr</sub> (3.1E9,-1240.,temp)                                      | Ref. <sup>63</sup> |
| HCOO <sup>-</sup> + NO <sub>3</sub>                 | → NO <sub>3</sub> <sup>-</sup> + H <sup>+</sup> + O <sub>2</sub> <sup>-</sup> + CO <sub>2</sub> | k <sub>arr</sub> (5.1E7,-2200.,temp)                                      | Ref. <sup>65</sup> |
| HCOO <sup>-</sup> + SO <sub>4</sub> <sup>-</sup>    | → SO <sub>4</sub> <sup>2-</sup> + HO <sub>2</sub> + CO <sub>2</sub>                             | k <sub>arr</sub> (1.7E8,-1500.,temp)                                      | Ref. <sup>68</sup> |
| HCOO <sup>-</sup> + SO <sub>5</sub> <sup>-</sup>    | → HSO <sub>5</sub> <sup>-</sup> + O <sub>2</sub> <sup>-</sup> + CO <sub>2</sub>                 | k <sub>arr</sub> (1.4E4,-4000.,temp)                                      | Ref. <sup>68</sup> |
| HCOO <sup>-</sup> + CO <sub>3</sub> <sup>-</sup>    | → 2 HCO <sub>3</sub> <sup>-</sup> + HO <sub>2</sub>                                             | 1.5E5                                                                     | Ref. <sup>64</sup> |
| HCOO <sup>-</sup> + O <sub>3</sub>                  | → OH + O <sub>2</sub> <sup>-</sup> + CO <sub>2</sub>                                            | 1.E2                                                                      | Ref. <sup>69</sup> |

*iii. Henry's law constants*

The intrinsic Henry's law constant for formaldehyde is used (H<sub>HCHO</sub>=2.53 M atm<sup>-1</sup>). This is derived from the H\* used in Ref. <sup>70</sup> and the hydration equilibrium constant at 298 K by Ref. <sup>62</sup> K<sub>hyd</sub>= 1.28 × 10<sup>3</sup> knowing that the relationship between H\* and H for carbonyls is calculated according to the formula:

$$H^* = H \times (1 + K_{\text{hyd}})$$

The Henry's law constant of methanediol (H<sub>HOCH<sub>2</sub>OH</sub>) has not been measured at any temperature. Moreover, estimation methods bear inherent uncertainties. The HENRYWIN v3.10 software from the EPI suite provides estimates with three methods ranging from 0.25 to 9.3 × 10<sup>4</sup> M atm<sup>-1</sup> at 298 K (i.e., spanning almost two orders of magnitude). For C<sub>1</sub>-C<sub>2</sub> alcohols

and hydroperoxides (including hydroxymethyl hydroperoxide), the HENRYWIN estimates with the bond method are within a factor of 3 of the experimental data, whereas for the small glycol 1,2-ethanediol, the estimate differs from the experimental values by more than an order of magnitude. For such similar compounds, the temperature dependence of the Henry's law constant suggests that this latter could be roughly one order of magnitude higher at typical temperatures of warm clouds. Nevertheless, this remains uncertain as measurements at temperatures down to  $\sim 248$  K indicate that in supercooled water (such as in the clouds) the solubility of some VOCs decreases with the temperature as much as it increases between 273 K and 298 K due to ice-like clusters expelling the VOCs to the gas phase<sup>71</sup>. Therefore, to gauge the impact of all these uncertainties on the results, two EMAC simulations have been performed with  $H_{\text{HOCH}_2\text{OH}}=10^6 \text{ M atm}^{-1}$  (EMAC<sub>(dioh)</sub>) and  $H_{\text{HOCH}_2\text{OH}}=10^4 \text{ M atm}^{-1}$  (EMAC<sub>(diol)</sub>). The latter value is the intermediate estimate employing the bond method by HENRYWIN v3.10 from the EPI suite, whereas the former ( $H_{\text{HOCH}_2\text{OH}}=10^6 \text{ M atm}^{-1}$ ) has been set two orders of magnitude higher. This interval includes both an uncertainty on HENRYWIN predictions, set here at one order of magnitude, and the possible temperature dependence of the methanediol solubility, for which no constraint exists. The extra formic acid that is predicted by EMAC<sub>(dioh)</sub> and EMAC<sub>(diol)</sub> compared to the reference simulation provide, respectively, a lower and a higher estimate of the additional formic acid that is produced via the multiphase processing of formaldehyde. However, if we assume that the solubility of methanediol at 298 K is similar to the one of hydroxymethyl hydroperoxide ( $\sim 10^6 \text{ M atm}^{-1}$ ), methanediol solubility could be as high as  $\sim 10^7 \text{ M atm}^{-1}$  at typical temperatures of warm clouds.

For the dry deposition calculations, an effective H of  $10^6 \text{ M atm}^{-1}$  for methanediol has been used similarly to the one needed to reproduce deposition fluxes of hydroxymethyl hydroperoxide as reported by Ref. <sup>51</sup>.

#### 4. Methanediol measurements

The unexpectedly large formic acid amount resulting from the cloud processing pathway raises the question why significant concentrations of a simple molecule like methanediol could elude detection and identification. Many chamber studies in the past have used the Hantzsch method to detect formaldehyde<sup>72</sup>. However, the method involves a liquid-phase derivatization of formaldehyde, which involves methanediol, and therefore cannot be distinguished from. On the other hand, in the last two decades field measurements of formaldehyde have been widely performed with proton-transfer-reaction mass spectrometry (PTR-MS). With PTR-MS instruments, the fragment mass-to-charge ratio ( $m/z$ ) 31 ( $\text{CH}_3\text{O}^+$ ) is detected, for which interferences from other compounds have been identified and investigated<sup>73-75</sup>. Although methyl hydroperoxide and higher alcohols have been shown to be sources of  $m/z$  31, the contribution of methanediol has never been considered. Alcohols, when protonated in the PTR-MS instruments, are well known to eliminate a water molecule and methanediol is expected to significantly contribute to  $m/z$  31 in air masses with a cloud processing history. In fact, our chamber experiments yielded a PTR-MS signal at  $m/z$  31 with a time profile that is a combination of the ones for formaldehyde (DOAS) and methanediol (Hantzsch - DOAS). This is also the case for the much weaker signal at  $m/z$  49. Our model predictions with  $\text{EMAC}_{(\text{dih})}$  and  $\text{EMAC}_{(\text{diol})}$  for the minimum and maximum interference of methanediol on field measurements of formaldehyde are given as the annual average  $\text{HOCH}_2\text{OH}_{(\text{g})}/\text{HCHO}_{(\text{g})}$  ratio (SI Fig. 6).

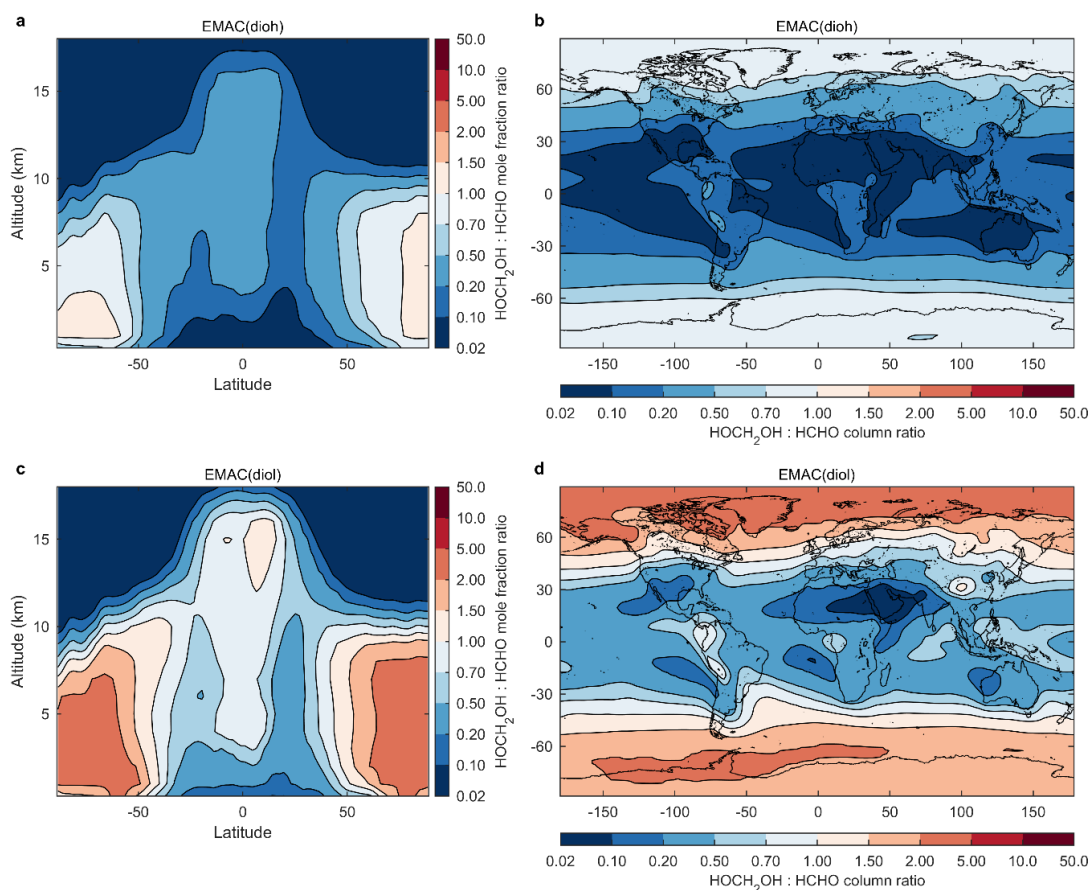

**Supplementary Information Figure 6 | Methanediol-to-formaldehyde ratio from EMAC.** a-d, Zonal mean of the  $\text{HOCH}_2\text{OH}/\text{HCHO}$  ratio (a,c) and of the  $\text{HOCH}_2\text{OH}/\text{HCHO}$  column ratio (b,d) predicted by the  $\text{EMAC}_{(\text{dih})}$  (top panels) and  $\text{EMAC}_{(\text{diol})}$  (bottom panels) simulations, averaged over the 2010-2012 time period.

## 5. Remaining sources of uncertainties in model simulations

Uncertainties on the strength of the major pathways leading to formic acid remain. In this section we explore several reasons for the model-to-observation biases. Note that several points are already presented in the manuscript and that the effect of the uncertainties on the Henry's law constant of methanediol is discussed in SI Sect. 3.b.iii.

The total column overestimate of EMAC compared to IASI (Fig. 1; ED Figs 3,4) could suggest that VOC ozonolysis is overestimated over pristine tropical forests. Indeed, the isoprene oxidation scheme used in this study<sup>37</sup> may still under-predict the measured OH concentrations in such environments<sup>76, 77</sup> and overestimate the magnitude of VOC reactions with ozone. Inversion studies suggest a model overestimate of formaldehyde over tropical continental regions<sup>78</sup>. This is ascribed to a bias in the modelled isoprene emissions, although the uncertainty springing from the model VOC oxidation schemes is acknowledged. Our results indicate that the slow methanediol dehydration curbs formaldehyde outgassing, and thus leads to significantly lower formaldehyde levels, especially in remote environments.

The modelled distribution of clouds and cloud liquid water content is expected to significantly affect our estimates of the total methanediol being outgassed from cloud droplets. For instance, different convection parameterizations yield quite different cloudiness and precipitation patterns<sup>79</sup>. Furthermore, observational evidence of self-aggregation of convection systems has been presented and shown to lead to decreased low- and mid-level cloudiness, and to a drier free troposphere<sup>80, 81</sup>. A recent model study suggests that self-aggregation of convection could reduce the modelled cloud liquid water total column by as much as 15%<sup>82</sup>. This could also partly explained the EMAC<sub>(diol)</sub> over-prediction compared to the FTIR formic acid columns at remote sites.

Finally, the potential formation of unreactive water complexes of formic acid (HCOOH·H<sub>2</sub>O) and methanediol (HOCH<sub>2</sub>OH·H<sub>2</sub>O) has to be considered. From theoretical kinetic data<sup>83</sup> it has indeed been suggested that up to 12% of formic acid can form this complex under tropospheric conditions frequent within the tropics (100% humidity and high ambient temperatures). Hydrogen bonding of water with the two hydroxyl groups could potentially favour the formation of a HOCH<sub>2</sub>OH·H<sub>2</sub>O complex stronger than HCOOH·H<sub>2</sub>O. Although the experimentally determined equilibrium constant is lacking, a recent theoretical determination suggest that HOCH<sub>2</sub>OH·H<sub>2</sub>O cannot be abundant<sup>22</sup>.

The remaining negative biases of the model-to-IASI comparison, especially over Siberia and North China, could be further reduced by including a more advanced vegetative source accounting for high net upward fluxes of formic acid from the boreal ecosystem<sup>48, 49</sup>. The source from vinyl alcohol might be underestimated as models predict too low levels of its precursor acetaldehyde. Moreover, such biases could also be dampened by implementing the explicit methanediol dehydration kinetics in the aerosol chemical mechanism. Ref. <sup>84</sup> discussed the potential role of aerosol for formic acid production although focusing on a reactive uptake of OH on biomass burning aerosols. However, the aerosol-mediated pathway to formic acid we propose here is expected to have a lower impact than the cloud-mediated one on the global scale because of the much larger liquid water content in clouds.

## **6. Model comparison with FTIR measurements**

The ground-based Fourier Transform InfraRed (FTIR) total column measurements used here have been derived from high-resolution (between 0.004 and 0.011  $\text{cm}^{-1}$ ) IR solar absorption spectra recorded regularly, under clear-sky conditions, at a suite of sites located at various latitudes (ED Fig. 1). Most of them are affiliated with the Network for the Detection of Atmospheric Composition Change (NDACC; <http://www.ndacc.org>)<sup>85</sup>. Vertical distributions of formic acid have been retrieved with either the PROFITT, SFIT-2 or SFIT-4 NDACC codes, all implementing the Optimal Estimation method of Ref. <sup>86</sup>. In all cases, the HITRAN 2008 spectroscopic compilation<sup>87</sup> has been adopted, complemented with pseudo-line parameters for heavy species provided by G.C. Toon (NASA-JPL, Pasadena, CA). Although the retrieval approaches may vary slightly from site to site, all strategies use a broad spectral fitting window encompassing the  $\nu_6$  Q-branch of formic acid at 1105  $\text{cm}^{-1}$  as well as a supplemental window needed to properly fit HDO, a critical interference species in the main window (e.g., Refs <sup>88-90</sup>). The a priori vertical distributions for the target and interfering species correspond to averages of profiles deduced from the IRWG iteration 6 of WACCM<sup>91</sup> v4 (Whole Atmosphere Community Climate Model) model predictions for the 1980-2020 time period employing the REFC1.3 scenario as part of the CCMVal/CCMI, 2012 project. Typical Degree Of Freedom for Signal (DOFS) values of  $\sim 1$  from the retrievals, and inspection of the averaging kernel matrices, indicate that limited vertical information is available from the FTIR measurements, with a sensitivity restricted to the troposphere. Typical random and systematic uncertainties affecting the retrieved total columns have been evaluated in previous studies; they are in the range of 11-13 and 15-18%, respectively. More information can be found in Ref. <sup>92</sup> and references therein.

The model outputs and FTIR observations presented here cover the 2010-2012 time period. Owing to the scarcity of FTIR observations at some sites, a regular sampling of FTIR measurements throughout the year is not always guaranteed and hence the representation of the typical seasonal cycle of formic acid abundance may be impacted. The model outputs used here consist of daily mean formic acid volume mixing ratio (VMR) profiles, saved at the pixel encompassing the FTIR station. To account for the vertical resolution and sensitivity of the FTIR retrievals, the individual VMR profiles simulated by EMAC are interpolated onto the NDACC standard vertical scheme adopted at each FTIR station, according to a mass conservative interpolation. They are then smoothed by applying the FTIR averaging kernels according to the formalism of Ref. <sup>93</sup> (except for Wollongong where no averaging kernels are available). The averaging kernels used to convolve the model outputs are seasonal averages over December – February, March – May, June – August and September – November, and over the 2010-2012 years, obtained from the individual FTIR retrievals. Application of the averaging kernels provides the model vertical distribution of formic acid as would be seen by each FTIR instrument. The EMAC total columns are eventually computed from these smoothed VMR profiles by using the corresponding regridded air density profiles simulated by the model.

Extended Data Fig. 1 presents the seasonal cycle of the formic acid total columns derived from the ground-based FTIR observations and EMAC simulations at nine sites. Similar to the comparison involving IASI, it highlights the global under-prediction of formic acid abundance by EMAC<sub>(base)</sub> compared to the FTIR measurements. The implementation of the kinetically-limited dehydration and outgassing of aqueous-phase methanediol (EMAC<sub>(dih-diol)</sub>) reconciles the model simulations with the FTIR observations at many sites. However, EMAC<sub>(diol)</sub> simulation, in particular, over-predicts the FTIR formic acid columns at the Jungfraujoch and Izana high-altitude station, whereas EMAC<sub>(dih-diol)</sub>, despite noticeable improvements, cannot completely reproduce the peaks of elevated formic acid columns observed at Toronto and Wollongong. Reasons for these remaining model-to-observation discrepancies are likely linked to the relatively coarse resolution of the model simulation, which dilutes the formic acid information within a grid box and therefore fails to reproduce local enhancements or steep topography. Other local sources of formic acid might also be missing in the model.



## **7. OMI column observations**

The Ozone Monitoring Instrument (OMI) is a nadir-viewing imaging spectrometer launched onboard the Aura platform in July 2004 in a Sun-synchronous polar orbit crossing the Equator around 13:30 local time (in ascending mode). It measures the solar radiation backscattered by the Earth's atmosphere and surface over the 270-500 nm wavelength range with a spectral resolution of about 0.5 nm<sup>94</sup>.

The OMI formaldehyde dataset used here<sup>95</sup> is a European product developed in the framework of the EU FP7-project Quality Assurance for Essential Climate Variables (QA4ECV). The aim of this project is to address the need for reliable and traceable quality information by providing a fully traceable quality assurance effort on all aspects of the retrieval algorithm. The OMI formaldehyde retrieval details are provided in the QA4ECV deliverable 4.2 (2016, <http://www.qa4ecv.eu/sites/default/files/D4.2.pdf>) and the data files (v1.1) are openly distributed via the QA4ECV website (<http://www.qa4ecv.eu/ecv/hcho-p>).

Formaldehyde tropospheric columns are retrieved using the DOAS method including two main steps: (1) the fit into the earthshine radiance of the formaldehyde absorption along the mean light path between the Sun and the satellite (the slant column), (2) a radiative transfer calculation of the mean light path in order to transform the slant column into a vertical column for each observation condition (the air mass factor). For weak absorbers such as formaldehyde, an additional step is performed, consisting in the normalization of the tropospheric column using as reference region the remote Pacific Ocean (the background correction). The final tropospheric column is therefore a differential column providing the amount of formaldehyde over the background value due to methane oxidation.

The OMI formaldehyde slant columns are retrieved in the 328.5-359 nm interval. A set of high-resolution cross-sections is used, among them the formaldehyde absorption cross sections of Ref. <sup>96</sup>. Air mass factors are calculated using radiative transfer simulations performed with the LIDORT code<sup>97</sup>. Clouds are treated in the independent pixel approximation. Observations with cloud fractions larger than 40% are filtered out. No explicit correction is applied for aerosols but the cloud correction scheme accounts for a large part of the aerosol scattering effect<sup>98</sup>. The monthly albedo climatology of Ref. <sup>99</sup> at 342 nm is used. Daily a priori formaldehyde vertical profiles are obtained from the TM5 model<sup>100</sup>. Total column averaging kernels are provided for each pixel, as well as an estimate of the random and systematic error budget. The random uncertainty is of the order of  $8 \times 10^{15}$  molecules cm<sup>-2</sup> for an OMI pixel. The systematic error remaining on the monthly and regionally averaged column is comprised between 20 and 40%.

The OMI averaging kernels were considered throughout this study for the model-to-satellite comparisons (see ED Figs 5,6). In that framework, the EMAC vertical profiles of formaldehyde (in partial subcolumns), sampled at the time and location of the OMI measurements, were interpolated onto the OMI pressure grids and smoothed by applying the OMI total column averaging kernels. The interpolation/convolution of a model profile was performed successively for each individual OMI observations embedded in a given model grid box, on a daily basis. It resulted in model vertical distributions of formaldehyde as would be retrieved by the OMI sensor, taking into account its non-uniform vertical sensitivity to the formaldehyde vertical distribution which is different for every satellite observation. A daily mean formaldehyde total column was eventually obtained for this model grid box by averaging all the formaldehyde total columns computed from the smoothed model profiles.

## 8. Supplementary figures

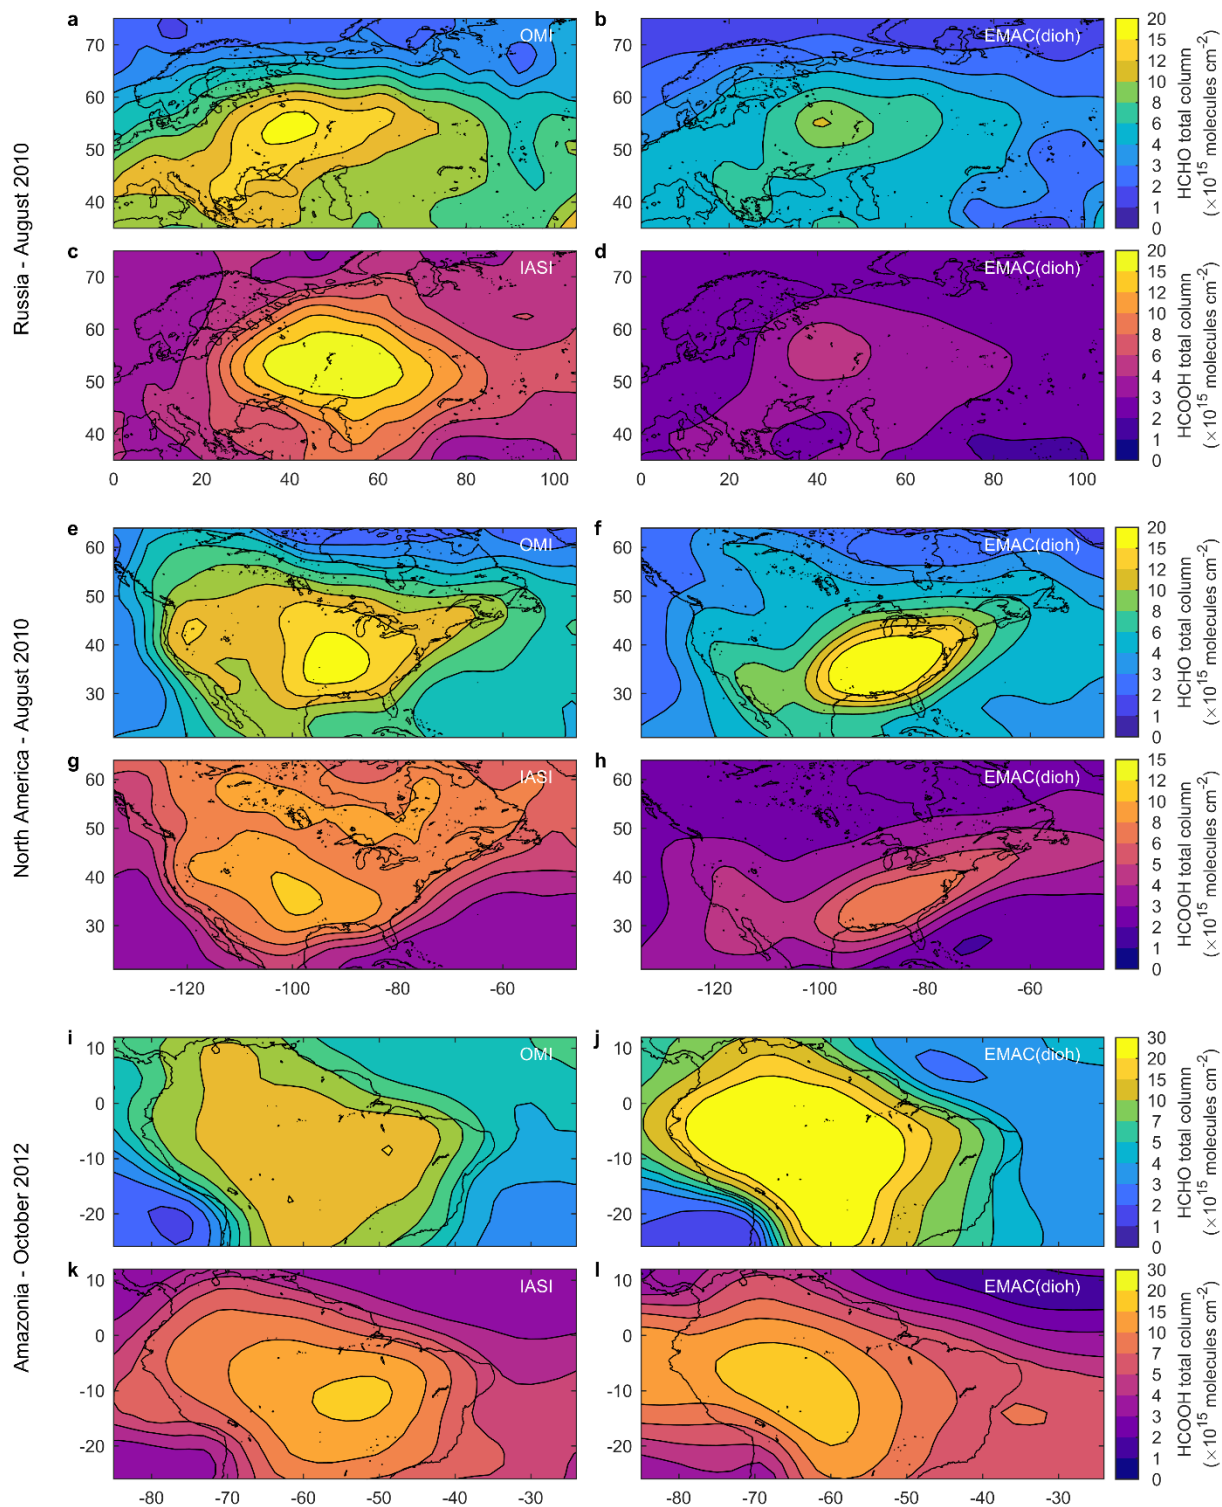

**Supplementary Information Figure 7 | Impact of modelled formaldehyde biases on formic acid prediction.** a-l, Monthly averaged formaldehyde (HCHO) and formic acid (HCOOH) columns (in  $10^{15}$  molecules  $\text{cm}^{-2}$ ) from IASI and OMI satellite measurements, respectively, and from the EMAC<sub>(dioh)</sub> simulation, over Russia in August 2010 (a-d), North America in August 2010 (e-h), and Amazonia in October 2010 (i-l). HCHO and HCOOH model data were sampled at the time and location of the OMI and IASI satellite measurements, respectively. The OMI averaging kernels were applied to the model profiles to account for the vertical sensitivity and resolution of OMI (IASI averaging kernels are not available).

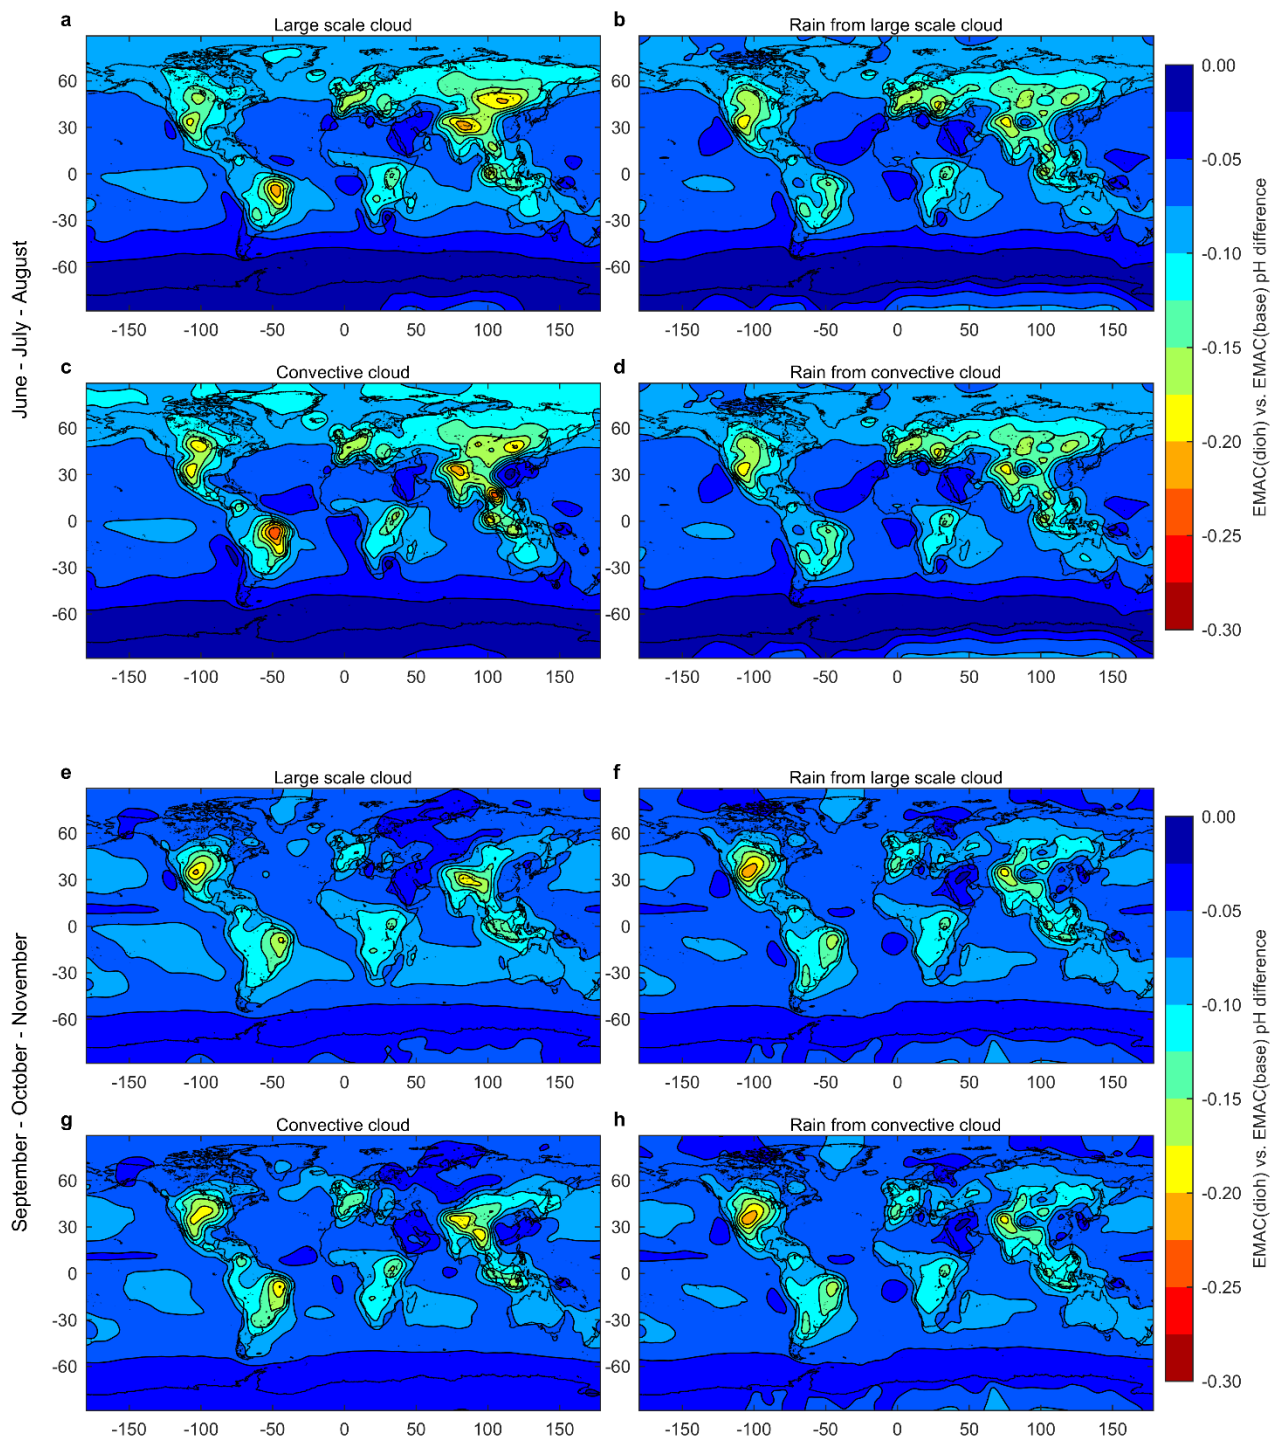

**Supplementary Information Figure 8 | Impact of the cloud processing on cloud and rainwater acidity.** a-h, pH difference of the large scale clouds (a,e) and associated rain (b,f), and of the convective clouds (c,g) and associated rain (d,h), between the EMAC<sub>(dioh)</sub> and EMAC<sub>(base)</sub> simulations. The pH differences presented here are seasonal averages over June – August (a-d) and September – November (e-h) 2010-2012. The pH decrease is due to the additional formic acid (HCOOH) production via the multiphase chemistry of methanediol implemented in EMAC<sub>(dioh)</sub>.

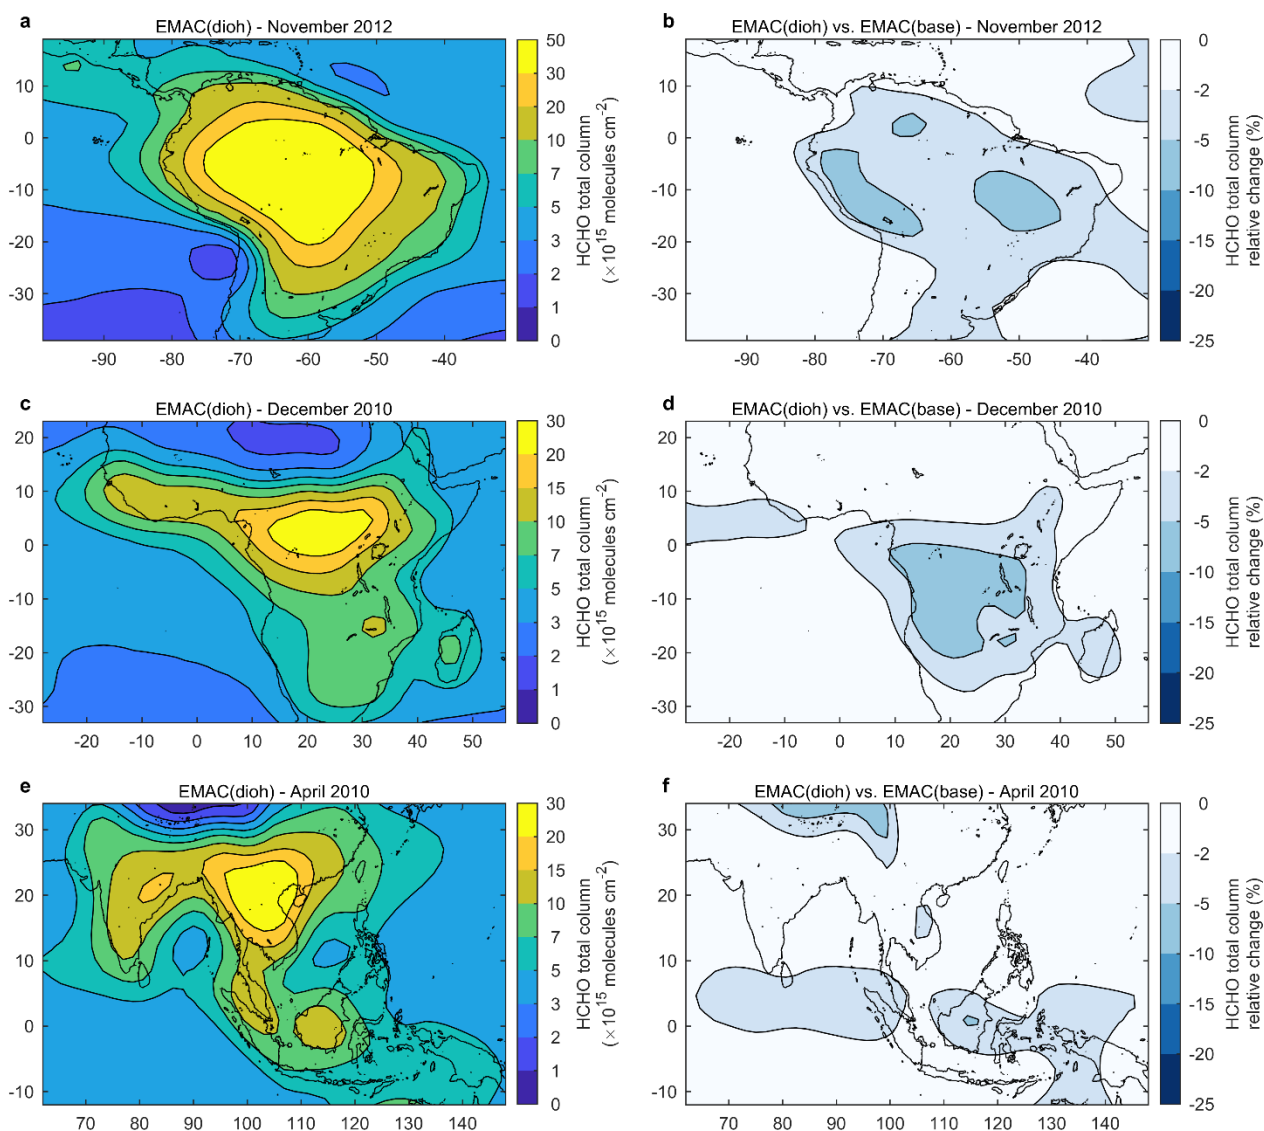

**Supplementary Information Figure 9 | Impact of the cloud processing on formaldehyde modelling.** Monthly averaged formaldehyde (HCHO) total column (in  $10^{15}$  molecules  $\text{cm}^{-2}$ ) simulated by the model implementing the multiphase chemistry of methanediol (EMAC<sub>(dioh)</sub>; **left panels**), and relative difference of HCHO total column between EMAC<sub>(dioh)</sub> and the base version of the model (EMAC<sub>(base)</sub>; **right panels**), over Amazonia in November 2012 (**a,b**), Central Africa in December 2010 (**c,d**) and Southeast Asia in April 2010 (**e,f**).

## 9. References

- [1] Rohrer, F. *et al.* Characterisation of the photolytic HONO-source in the atmosphere simulation chamber SAPHIR. *Atmospheric Chemistry and Physics* **5**, 2189–2201 (2005).
- [2] Kaiser, J. *et al.* Intercomparison of Hantzsch and fiber-laser-induced-fluorescence formaldehyde measurements. *Atmospheric Measurement Techniques* **7**, 1571–1580 (2014).
- [3] Dorn, H.-P., Brandenburger, U., Brauers, T. & Hausmann, M. A New In Situ Laser Long-Path Absorption Instrument for the Measurement of Tropospheric OH Radicals. *Journal of the Atmospheric Sciences* **52**, 3373–3380 (1995).
- [4] Jordan, A. *et al.* A high resolution and high sensitivity proton-transfer-reaction time-of-flight mass spectrometer (PTR-TOF-MS). *International Journal of Mass Spectrometry* **286**, 122–128 (2009).
- [5] Lou, S. *et al.* Atmospheric OH reactivities in the Pearl River Delta - China in summer 2006: measurement and model results. *Atmospheric Chemistry and Physics* **10**, 11243–11260 (2010).
- [6] Fuchs, H. *et al.* Comparison of OH reactivity measurements in the atmospheric simulation chamber SAPHIR. *Atmospheric Measurement Techniques* **10**, 4023–4053 (2017).
- [7] Dunning, T. H. Gaussian basis sets for use in correlated molecular calculations. I. The atoms boron through neon and hydrogen. *The Journal of Chemical Physics* **90**, 1007–1023 (1989).
- [8] Zhao, Y. & Truhlar, D. G. The M06 suite of density functionals for main group thermochemistry, thermochemical kinetics, noncovalent interactions, excited states, and transition elements: two new functionals and systematic testing of four M06-class functionals and 12 other functionals. *Theoretical Chemistry Accounts* **120**, 215–241 (2008). <https://doi.org/10.1007/s00214-007-0310-x>.
- [9] Alecu, I. M., Zheng, J., Zhao, Y. & Truhlar, D. G. Computational Thermochemistry: Scale Factor Databases and Scale Factors for Vibrational Frequencies Obtained from Electronic Model Chemistries. *Journal of Chemical Theory and Computation* **6**, 2872–2887 (2010).
- [10] Bao, J. L. *et al.* Database of Frequency Scale Factors for Electronic Model Chemistries (Version 3 Beta 2) (2017). <https://comp.chem.umn.edu/freqscale/version3b2.htm>.
- [11] Purvis, G. D. & Bartlett, R. J. A full coupled-cluster singles and doubles model: The inclusion of disconnected triples. *The Journal of Chemical Physics* **76**, 1910–1918 (1982).
- [12] Martin, J. M. L. Ab initio total atomization energies of small molecules - towards the basis set limit. *Chemical Physics Letters* **259**, 669–678 (1996).
- [13] Coote, M. L., Collins, M. A. & Radom, L. Calculation of accurate imaginary frequencies and tunnelling coefficients for hydrogen abstraction reactions using IRCmax. *Molecular Physics* **101**, 1329–1338 (2003).
- [14] Frisch, M. J. *et al.* *Gaussian 09, Revision B.01*. Gaussian Inc., Wallingford CT (2010).
- [15] Frisch, M. J. *et al.* *Gaussian 09, Revision A.02*. Gaussian Inc., Wallingford CT (2016).
- [16] Ocaña, A. J. *et al.* Gas-phase reactivity of CH<sub>3</sub>OH toward OH at interstellar temperatures (11.7–177.5 K): experimental and theoretical study. *Physical Chemistry Chemical Physics* **21**, 6942–6957 (2019).
- [17] Vereecken, L. & Peeters, J. The 1,5-H-shift in 1-butoxy: A case study in the rigorous implementation of transition state theory for a multirotamer system. *The Journal of Chemical Physics* **119**, 5159–5170 (2003).

- [18] Gao, L. G., Zheng, J., Fernández-Ramos, A., Truhlar, D. G. & Xu, X. Kinetics of the Methanol Reaction with OH at Interstellar, Atmospheric, and Combustion Temperatures. *Journal of the American Chemical Society* **140**, 2906–2918 (2018).
- [19] Nguyen, T. L., Ruscic, B. & Stanton, J. F. A master equation simulation for the .OH + CH<sub>3</sub>OH reaction. *The Journal of Chemical Physics* **150**, 084105 (2019).
- [20] Hazra, M. K., Francisco, J. S. & Sinha, A. Gas Phase Hydrolysis of Formaldehyde To Form Methanediol: Impact of Formic Acid Catalysis. *The Journal of Physical Chemistry A* **117**, 11704–11710 (2013).
- [21] Kumar, M. & Francisco, J. S. The Role of Catalysis in Alkanediol Decomposition: Implications for General Detection of Alkanediols and Their Formation in the Atmosphere. *The Journal of Physical Chemistry A* **119**, 9821–9833 (2015).
- [22] Kumar, M., Anglada, J. M. & Francisco, J. S. Role of Proton Tunneling and Metal-Free Organocatalysis in the Decomposition of Methanediol: A Theoretical Study. *The Journal of Physical Chemistry A* **121**, 4318–4325 (2017).
- [23] Boese, A. D. & Martin, J. M. L. Development of density functionals for thermochemical kinetics. *The Journal of Chemical Physics* **121**, 3405–3416 (2004).
- [24] Veyret, B. *et al.* Kinetics and mechanism of the photo-oxidation of formaldehyde. 1. Flash photolysis study. *The Journal of Physical Chemistry* **93**, 2368–2374 (1989).
- [25] Evleth, E. M., Melius, C. F., Rayez, M. T., Rayez, J. C. & Forst, W. Theoretical characterization of the reaction of hydroperoxy with formaldehyde. *The Journal of Physical Chemistry* **97**, 5040–5045 (1993).
- [26] Aloisio, S. & Francisco, J. S. Complexes of Hydroxyl and Hydroperoxyl Radical with Formaldehyde, Acetaldehyde, and Acetone. *The Journal of Physical Chemistry A* **104**, 3211–3224 (2000).
- [27] Gierczak, T. & Ravishankara, A. R. Does the HO<sub>2</sub> radical react with ketones? *International Journal of Chemical Kinetics* **32**, 573–580 (2000).
- [28] Olivella, S., Bofill, J. M. & Solé, A. Ab Initio Calculations on the Mechanism of the Oxidation of the Hydroxymethyl Radical by Molecular Oxygen in the Gas Phase: A Significant Reaction for Environmental Science. *Chemistry - A European Journal* **7**, 3377–3386 (2001).
- [29] Tomas, A., Villenave, E. & Lesclaux, R. Reactions of the HO<sub>2</sub> Radical with CH<sub>3</sub>CHO and CH<sub>3</sub>C(O)O<sub>2</sub> in the Gas Phase. *The Journal of Physical Chemistry A* **105**, 3505–3514 (2001).
- [30] Dibble, T. S. Mechanism and dynamics of the CH<sub>2</sub>OH + O<sub>2</sub> reaction. *Chemical Physics Letters* **355**, 193–200 (2002).
- [31] Aloisio, S. & Francisco, J. S. Complexes of Hydroperoxyl Radical with Glyoxal, Methylglyoxal, Methylvinyl Ketone, Acrolein, and Methacrolein: Possible New Sinks for HO<sub>2</sub> in the Atmosphere? *The Journal of Physical Chemistry A* **107**, 2492–2496 (2003).
- [32] Hermans, I., Nguyen, T. L., Jacobs, P. A. & Peeters, J. Tropopause Chemistry Revisited: HO<sub>2</sub>-Initiated Oxidation as an Efficient Acetone Sink. *Journal of the American Chemical Society* **126**, 9908–9909 (2004).
- [33] Hermans, I., Müller, J.-F., Nguyen, T. L., Jacobs, P. A. & Peeters, J. Kinetics of  $\alpha$ -Hydroxyalkylperoxyl Radicals in Oxidation Processes. HO<sub>2</sub>-Initiated Oxidation of Ketones/Aldehydes near the Tropopause. *The Journal of Physical Chemistry A* **109**, 4303–4311 (2005).

- [34] Cours, T., Canneaux, S. & Bohr, F. Features of the potential energy surface for the reaction of HO<sub>2</sub> radical with acetone. *International Journal of Quantum Chemistry* **107**, 1344–1354 (2007).
- [35] Dillon, T. J., Pozzer, A., Vereecken, L., Crowley, J. N. & Lelieveld, J. Does acetone react with HO<sub>2</sub> in the upper-troposphere? *Atmospheric Chemistry and Physics* **12**, 1339–1351 (2012).
- [36] Sander, R. *et al.* The community atmospheric chemistry box model CAABA/MECCA-4.0. *Geoscientific Model Development* **12**, 1365–1385 (2019).
- [37] Lelieveld, J., Gromov, S., Pozzer, A. & Taraborrelli, D. Global tropospheric hydroxyl distribution, budget and reactivity. *Atmospheric Chemistry and Physics* **16**, 12477–12493 (2016).
- [38] Jöckel, P. *et al.* Development cycle 2 of the Modular Earth Submodel System (MESSy2). *Geoscientific Model Development* **3**, 717–752 (2010).
- [39] Riva, M. *et al.* Chemical Characterization of Secondary Organic Aerosol from Oxidation of Isoprene Hydroxyhydroperoxides. *Environmental Science & Technology* **50**, 9889–9899 (2016).
- [40] So, S., Wille, U. & da Silva, G. Atmospheric Chemistry of Enols: A Theoretical Study of the Vinyl Alcohol + OH + O<sub>2</sub> Reaction Mechanism. *Environmental Science & Technology* **48**, 6694–6701 (2014).
- [41] Andrews, D. U. *et al.* Photo-Tautomerization of Acetaldehyde to Vinyl Alcohol: A Potential Route to Tropospheric Acids. *Science* **337**, 1203–1206 (2012).
- [42] Clubb, A. E., Jordan, M. J. T., Kable, S. H. & Osborn, D. L. Phototautomerization of Acetaldehyde to Vinyl Alcohol: A Primary Process in UV-Irradiated Acetaldehyde from 295 to 335 nm. *The Journal of Physical Chemistry Letters* **3**, 3522–3526 (2012).
- [43] Calvert, J. *Mechanisms of Atmospheric Oxidation of the Oxygenates* (Oxford University Press, Inc., 2011).
- [44] da Silva, G. Carboxylic Acid Catalyzed Keto-Enol Tautomerizations in the Gas Phase. *Angewandte Chemie International Edition* **49**, 7523–7525 (2010).
- [45] Sindelarova, K. *et al.* Global data set of biogenic VOC emissions calculated by the MEGAN model over the last 30 years. *Atmospheric Chemistry and Physics* **14**, 9317–9341 (2014).
- [46] Guenther, A. B. *et al.* The Model of Emissions of Gases and Aerosols from Nature version 2.1 (MEGAN2.1): an extended and updated framework for modeling biogenic emissions. *Geoscientific Model Development* **5**, 1471–1492 (2012).
- [47] Hagemann, S. & Stacke, T. Impact of the soil hydrology scheme on simulated soil moisture memory. *Climate Dynamics* **44**, 1731–1750 (2014).
- [48] Schobesberger, S. *et al.* High upward fluxes of formic acid from a boreal forest canopy. *Geophysical Research Letters* **43**, 9342–9351 (2016).
- [49] Alwe, H. D. *et al.* Oxidation of Volatile Organic Compounds as the Major Source of Formic Acid in a Mixed Forest Canopy. *Geophysical Research Letters* **46**, 2940–2948 (2019).
- [50] Chameides, W. L. The photochemistry of a remote marine stratiform cloud. *Journal of Geophysical Research* **89**, 4739 (1984).
- [51] Nguyen, T. B. *et al.* Rapid deposition of oxidized biogenic compounds to a temperate forest. *Proceedings of the National Academy of Sciences* **112**, E392–E401 (2015).
- [52] Kerkweg, A. *et al.* Technical Note: An implementation of the dry removal processes DRY DEPosition and SEDimentation in the Modular Earth Submodel System (MESSy). *Atmospheric Chemistry and Physics* **6**, 4617–4632 (2006).

- [53] Katul, G. G., Palmroth, S. & Oren, R. Leaf stomatal responses to vapour pressure deficit under current and CO<sub>2</sub>-enriched atmosphere explained by the economics of gas exchange. *Plant, Cell & Environment* **32**, 968–979 (2009).
- [54] Jarvis, P. G. The Interpretation of the Variations in Leaf Water Potential and Stomatal Conductance Found in Canopies in the Field. *Philosophical Transactions of the Royal Society B: Biological Sciences* **273**, 593–610 (1976).
- [55] Delworth, T. L. & Manabe, S. The Influence of Potential Evaporation on the Variabilities of Simulated Soil Wetness and Climate. *Journal of Climate* **1**, 523–547 (1988).
- [56] Zhang, L., Brook, J. R. & Vet, R. On ozone dry deposition with emphasis on non-stomatal uptake and wet canopies. *Atmospheric Environment* **36**, 4787–4799 (2002).
- [57] Paulot, F. *et al.* Representing sub-grid scale variations in nitrogen deposition associated with land use in a global Earth system model: implications for present and future nitrogen deposition fluxes over North America. *Atmospheric Chemistry and Physics* **18**, 17963–17978 (2018).
- [58] Pozzer, A. *et al.* Technical Note: The MESSy-submodel AIRSEA calculating the air-sea exchange of chemical species. *Atmospheric Chemistry and Physics* **6**, 5435–5444 (2006).
- [59] Kieber, D. J., Vaughan, G. M. & Mopper, K. Determination of formate in natural waters by a coupled enzymatic/high-performance liquid chromatographic technique. *Analytical Chemistry* **60**, 1654–1659 (1988).
- [60] Funderburk, L. H., Aldwin, L. & Jencks, W. P. Mechanisms of general acid and base catalysis of the reactions of water and alcohols with formaldehyde. *Journal of the American Chemical Society* **100**, 5444–5459 (1978).
- [61] Boyce, S. D. & Hoffmann, M. R. Kinetics and mechanism of the formation of hydroxymethanesulfonic acid at low pH. *The Journal of Physical Chemistry* **88**, 4740–4746 (1984).
- [62] Winkelman, J. G. M., Voorwinde, O. K., Ottens, M., Beenackers, A. A. C. M. & Janssen, L. P. B. M. Kinetics and chemical equilibrium of the hydration of formaldehyde. *Chemical Engineering Science* **57**, 4067–4076 (2002).
- [63] Chin, M. & Wine, P. H. A Temperature-Dependent Competitive Kinetics Study of the Aqueous-Phase Reactions of OH Radicals with Formate, Formic Acid, Acetate, Acetic Acid, and Hydrated Formaldehyde. In *Aquatic and Surface Photochemistry*, 85–96 (Lewis Publishers, 1994).
- [64] Zellner, R. *et al.* Formation and reactions of oxidants in the aqueous. In Warneck, G. (ed.) *Heterogeneous and Liquid Phase Processes*, 146–152 (Springer, Berlin, 1996).
- [65] Exner, M., Herrmann, H. & Zellner, R. Rate constants for the reactions of the NO<sub>3</sub> radical with HCOOH/HCOO<sup>-</sup> and CH<sub>3</sub>COOH/CH<sub>3</sub>COO<sup>-</sup> in aqueous solution between 278 and 328 K. *Journal of Atmospheric Chemistry* **18**, 359–378 (1994).
- [66] Buxton, G. V., Salmon, G. A. & Wood, N. D. A Pulse Radiolysis Study of the Chemistry of Oxysulphur Radicals in Aqueous Solution. In Restelli, G. & Angeletti, G. (eds.) *Physico-Chemical Behaviour of Atmospheric Pollutants: Air Pollution Research Reports*, 245–250 (Springer Netherlands, Dordrecht, 1990).
- [67] Mouchel-Vallon, C. *et al.* CLEPS 1.0: A new protocol for cloud aqueous phase oxidation of VOC mechanisms. *Geoscientific Model Development* **10**, 1339–1362 (2017).
- [68] Jacob, D. J. Chemistry of OH in remote clouds and its role in the production of formic acid and peroxymonosulfate. *Journal of Geophysical Research* **91**, 9807 (1986).



- [69] Hoigné, J. & Bader, H. Rate constants of reactions of ozone with organic and inorganic compounds in water II. *Water Research* **17**, 185–194 (1983).
- [70] Burkholder, J. B. *et al.* Chemical Kinetics and Photochemical Data for Use in Atmospheric Studies, Evaluation No. 18. *JPL Publication 15-10, Jet Propulsion Lab., Pasadena, CA* (2015). <http://hdl.handle.net/2014/45510>.
- [71] Sieg, K., Starokozhev, E., Schmidt, M. U. & Pätzold, W. Inverse temperature dependence of Henry's law coefficients for volatile organic compounds in supercooled water. *Chemosphere* **77**, 8–14 (2009).
- [72] Kelly, T. J. & Fortune, C. R. Continuous Monitoring of Gaseous Formaldehyde Using an Improved Fluorescence Approach. *International Journal of Environmental Analytical Chemistry* **54**, 249–263 (1994).
- [73] Steinbacher, M. *et al.* Performance characteristics of a proton-transfer-reaction mass spectrometer (PTR-MS) derived from laboratory and field measurements. *International Journal of Mass Spectrometry* **239**, 117–128 (2004).
- [74] Inomata, S. *et al.* Technical Note: Determination of formaldehyde mixing ratios in air with PTR-MS: laboratory experiments and field measurements. *Atmospheric Chemistry and Physics* **8**, 273–284 (2008).
- [75] Warneke, C. *et al.* Airborne formaldehyde measurements using PTR-MS: calibration, humidity dependence, inter-comparison and initial results. *Atmospheric Measurement Techniques* **4**, 2345–2358 (2011).
- [76] Lelieveld, J. *et al.* Atmospheric oxidation capacity sustained by a tropical forest. *Nature* **452**, 737–740 (2008).
- [77] Whalley, L. K. *et al.* Quantifying the magnitude of a missing hydroxyl radical source in a tropical rainforest. *Atmospheric Chemistry and Physics* **11**, 7223–7233 (2011).
- [78] Bauwens, M. *et al.* Nine years of global hydrocarbon emissions based on source inversion of OMI formaldehyde observations. *Atmospheric Chemistry and Physics* **16**, 10133–10158 (2016).
- [79] Tost, H., Jöckel, P. & Lelieveld, J. Influence of different convection parameterisations in a GCM. *Atmospheric Chemistry and Physics* **6**, 5475–5493 (2006).
- [80] Bretherton, C. S., Blossey, P. N. & Khairoutdinov, M. An Energy-Balance Analysis of Deep Convective Self-Aggregation above Uniform SST. *Journal of the Atmospheric Sciences* **62**, 4273–4292 (2005).
- [81] Tobin, I., Bony, S. & Roca, R. Observational Evidence for Relationships between the Degree of Aggregation of Deep Convection, Water Vapor, Surface Fluxes, and Radiation. *Journal of Climate* **25**, 6885–6904 (2012).
- [82] Mauritsen, T. & Stevens, B. Missing iris effect as a possible cause of muted hydrological change and high climate sensitivity in models. *Nature Geoscience* **8**, 346–351 (2015).
- [83] Iuga, C., Alvarez-Idaboy, J. R. & Vivier-Bunge, A. Mechanism and Kinetics of the Water-Assisted Formic Acid + OH Reaction under Tropospheric Conditions. *The Journal of Physical Chemistry A* **115**, 5138–5146 (2011).
- [84] Paulot, F. *et al.* Importance of secondary sources in the atmospheric budgets of formic and acetic acids. *Atmospheric Chemistry and Physics* **11**, 1989–2013 (2011).
- [85] De Mazière, M. *et al.* The Network for the Detection of Atmospheric Composition Change (NDACC): history, status and perspectives. *Atmospheric Chemistry and Physics* **18**, 4935–4964 (2018).

- [86] Rodgers, C. D. *Inverse Methods for Atmospheric Sounding* (WORLD SCIENTIFIC, 2000).
- [87] Rothman, L. S. *et al.* The HITRAN 2008 molecular spectroscopic database. *Journal of Quantitative Spectroscopy and Radiative Transfer* **110**, 533–572 (2009).
- [88] Paton-Walsh, C. *et al.* Measurements of trace gas emissions from Australian forest fires and correlations with coincident measurements of aerosol optical depth. *Journal of Geophysical Research* **110** (2005).
- [89] Zander, R. *et al.* Formic acid above the Jungfraujoch during 1985–2007: observed variability, seasonality, but no long-term background evolution. *Atmospheric Chemistry and Physics* **10**, 10047–10065 (2010).
- [90] Vigouroux, C. *et al.* FTIR time-series of biomass burning products (HCN, C<sub>2</sub>H<sub>6</sub>, C<sub>2</sub>H<sub>2</sub>, CH<sub>3</sub>OH, and HCOOH) at Reunion Island (21° S, 55° E) and comparisons with model data. *Atmospheric Chemistry and Physics* **12**, 10367–10385 (2012).
- [91] Chang, L. *et al.* Structure of the migrating diurnal tide in the Whole Atmosphere Community Climate Model (WACCM). *Advances in Space Research* **41**, 1398–1407 (2008).
- [92] Pommier, M. *et al.* HCOOH distributions from IASI for 2008–2014: comparison with ground-based FTIR measurements and a global chemistry-transport model. *Atmospheric Chemistry and Physics* **16**, 8963–8981 (2016).
- [93] Rodgers, C. D. & Connor, B. J. Intercomparison of remote sounding instruments. *Journal of Geophysical Research: Atmospheres* **108** (2003).
- [94] Levelt, P. F. *et al.* The ozone monitoring instrument. *IEEE Transactions on Geoscience and Remote Sensing* **44**, 1093–1101 (2006).
- [95] De Smedt, I. *et al.* QA4ECV HCHO tropospheric column data from OMI (2017).
- [96] Meller, R. & Moortgat, G. K. Temperature dependence of the absorption cross sections of formaldehyde between 223 and 323 K in the wavelength range 225–375 nm. *Journal of Geophysical Research: Atmospheres* **105**, 7089–7101 (2000).
- [97] Spurr, R. LIDORT and VLIDORT: Linearized pseudo-spherical scalar and vector discrete ordinate radiative transfer models for use in remote sensing retrieval problems. In *Light Scattering Reviews 3*, 229–275 (Springer Berlin Heidelberg, 2008).
- [98] De Smedt, I. *et al.* Diurnal, seasonal and long-term variations of global formaldehyde columns inferred from combined OMI and GOME-2 observations. *Atmospheric Chemistry and Physics* **15**, 12519–12545 (2015).
- [99] Kleipool, Q. L., Dobber, M. R., de Haan, J. F. & Levelt, P. F. Earth surface reflectance climatology from 3 years of OMI data. *Journal of Geophysical Research* **113** (2008).
- [100] Huijnen, V. *et al.* The global chemistry transport model TM5: description and evaluation of the tropospheric chemistry version 3.0. *Geoscientific Model Development* **3**, 445–473 (2010).

## 10. Raw quantum chemical data

```

1
2
3 *****
4 CH2OHOH + OH : M06-2X/aug-cc-pVQZ geometry
5 *****
6
7 OH
8 -----
9 E(CCSD(T)/Aug-CC-pVDZ) (Hartree): -75.58401208
10 E(CCSD/Aug-CC-pVDZ) (Hartree): -75.58065075
11 T1 diagnostic: 0.012115
12 E(MP2/Aug-CC-pVDZ) (Hartree): -75.56555498
13 E(MP3/Aug-CC-pVDZ) (Hartree): -75.57785261
14 E(PMP2/Aug-CC-pVDZ) (Hartree): -75.56731410
15 E(PMP3/Aug-CC-pVDZ) (Hartree): -75.57891269
16 E(PUHF/Aug-CC-pVDZ) (Hartree): -75.40654471
17 E(UHF/Aug-CC-pVDZ) (Hartree): -75.40362085
18 E(CCSD(T)/Aug-CC-pVTZ) (Hartree): -75.64558106
19 E(CCSD/Aug-CC-pVTZ) (Hartree): -75.63969742
20 T1 diagnostic: 0.010018
21 E(MP2/Aug-CC-pVTZ) (Hartree): -75.62633534
22 E(MP3/Aug-CC-pVTZ) (Hartree): -75.63790257
23 E(PMP2/Aug-CC-pVTZ) (Hartree): -75.62832327
24 E(PMP3/Aug-CC-pVTZ) (Hartree): -75.63904324
25 E(PUHF/Aug-CC-pVTZ) (Hartree): -75.42495141
26 E(UHF/Aug-CC-pVTZ) (Hartree): -75.42160059
27 E(CCSD(T)/Aug-CC-pVQZ) (Hartree): -75.66449481
28 E(CCSD/Aug-CC-pVQZ) (Hartree): -75.65801686
29 T1 diagnostic: 0.009499
30 E(MP2/Aug-CC-pVQZ) (Hartree): -75.64662073
31 E(MP3/Aug-CC-pVQZ) (Hartree): -75.65673028
32 E(PMP2/Aug-CC-pVQZ) (Hartree): -75.64863276
33 E(PMP3/Aug-CC-pVQZ) (Hartree): -75.65786986
34 E(PUHF/Aug-CC-pVQZ) (Hartree): -75.42997948
35 E(UHF/Aug-CC-pVQZ) (Hartree): -75.42659099
36 E(UM062X/Aug-CC-pVQZ) (Hartree): -75.73716255
37 Point group : C*v
38 Cartesian coordinates (Angs):
39 O 0.000000 0.000000 0.107876
40 H 0.000000 0.000000 -0.863009
41 Rotational constants (GHz): 0.0000000 565.5013271 565.5013271
42 Vibrational harmonic frequencies (cm-1):
43 3774.9088 ( SG)
44 Zero-point correction (Hartree): 0.008600
45
46 H2O
47 -----
48 E(CCSD(T)/Aug-CC-pVDZ) (Hartree): -76.27375874
49 E(CCSD/Aug-CC-pVDZ) (Hartree): -76.26854748
50 T1 diagnostic: 0.012271
51 E(MP2/Aug-CC-pVDZ) (Hartree): -76.26077824
52 E(MP3/Aug-CC-pVDZ) (Hartree): -76.26552888
53 E(RHF/Aug-CC-pVDZ) (Hartree): -76.04138029
54 E(CCSD(T)/Aug-CC-pVTZ) (Hartree): -76.34228717
55 E(CCSD/Aug-CC-pVTZ) (Hartree): -76.33365549
56 T1 diagnostic: 0.010000
57 E(MP2/Aug-CC-pVTZ) (Hartree): -76.32895322
58 E(MP3/Aug-CC-pVTZ) (Hartree): -76.33162846
59 E(RHF/Aug-CC-pVTZ) (Hartree): -76.06056433
60 E(CCSD(T)/Aug-CC-pVQZ) (Hartree): -76.36357038
61 E(CCSD/Aug-CC-pVQZ) (Hartree): -76.35419494
62 T1 diagnostic: 0.009302
63 E(MP2/Aug-CC-pVQZ) (Hartree): -76.35189790
64 E(MP3/Aug-CC-pVQZ) (Hartree): -76.35266331
65 E(RHF/Aug-CC-pVQZ) (Hartree): -76.06594476
66 E(RM062X/Aug-CC-pVQZ) (Hartree): -76.43406572
67 Point group : C2V
68 Electronic state : 1-A1

```

*Ubiquitous atmospheric production of organic acids: Supplementary Information*

69 Cartesian coordinates (Angs):  
70 O 0.000000 0.000000 0.116414  
71 H -0.000000 0.761370 -0.465655  
72 H -0.000000 -0.761370 -0.465655  
73 Rotational constants (GHz): 833.2946100 432.5247700 284.7330100  
74 Vibrational harmonic frequencies (cm-1):  
75 1621.5710 3874.2767 3977.1406  
76 Zero-point correction (Hartree): 0.021581  
77  
78 HCOOH  
79 -----  
80 E(CCSD(T)/Aug-CC-pVDZ) (Hartree): -189.35460327  
81 E(CCSD/Aug-CC-pVDZ) (Hartree): -189.33585238  
82 T1 diagnostic: 0.017420  
83 E(MP2/Aug-CC-pVDZ) (Hartree): -189.32513793  
84 E(MP3/Aug-CC-pVDZ) (Hartree): -189.32728021  
85 E(RHF/Aug-CC-pVDZ) (Hartree): -188.79822504  
86 E(CCSD(T)/Aug-CC-pVTZ) (Hartree): -189.51736368  
87 E(CCSD/Aug-CC-pVTZ) (Hartree): -189.48983123  
88 T1 diagnostic: 0.016283  
89 E(MP2/Aug-CC-pVTZ) (Hartree): -189.48630572  
90 E(MP3/Aug-CC-pVTZ) (Hartree): -189.48385234  
91 E(RHF/Aug-CC-pVTZ) (Hartree): -188.84541078  
92 E(CCSD(T)/Aug-CC-pVQZ) (Hartree): -189.56749249  
93 E(CCSD/Aug-CC-pVQZ) (Hartree): -189.53793915  
94 T1 diagnostic: 0.015816  
95 E(MP2/Aug-CC-pVQZ) (Hartree): -189.54025456  
96 E(MP3/Aug-CC-pVQZ) (Hartree): -189.53334291  
97 E(RHF/Aug-CC-pVQZ) (Hartree): -188.85794793  
98 E(RM062X/Aug-CC-pVQZ) (Hartree): -189.77904290  
99 Electronic state : 1-A  
100 Cartesian coordinates (Angs):  
101 C 0.135063 0.398134 0.000098  
102 H 0.112031 1.492065 -0.000172  
103 O 1.125570 -0.264624 -0.000029  
104 O -1.109799 -0.088756 -0.000030  
105 H -1.048574 -1.053829 0.000058  
106 Rotational constants (GHz): 78.2078700 12.2278200 10.5745000  
107 Vibrational harmonic frequencies (cm-1):  
108 645.6403 673.2618 1075.0717  
109 1162.0952 1317.8711 1416.2754  
110 1868.3314 3097.6245 3796.7595  
111 Zero-point correction (Hartree): 0.034293  
112  
113 O2  
114 -----  
115 E(CCSD(T)/Aug-CC-pVDZ) (Hartree): -150.01953864  
116 E(CCSD/Aug-CC-pVDZ) (Hartree): -150.00783992  
117 T1 diagnostic: 0.017180  
118 E(MP2/Aug-CC-pVDZ) (Hartree): -150.00162297  
119 E(MP3/Aug-CC-pVDZ) (Hartree): -149.99987068  
120 E(PMP2/Aug-CC-pVDZ) (Hartree): -150.00832489  
121 E(PMP3/Aug-CC-pVDZ) (Hartree): -150.00299291  
122 E(PUHF/Aug-CC-pVDZ) (Hartree): -149.65581650  
123 E(UHF/Aug-CC-pVDZ) (Hartree): -149.64504328  
124 E(CCSD(T)/Aug-CC-pVTZ) (Hartree): -150.14009459  
125 E(CCSD/Aug-CC-pVTZ) (Hartree): -150.12173589  
126 T1 diagnostic: 0.017054  
127 E(MP2/Aug-CC-pVTZ) (Hartree): -150.11923543  
128 E(MP3/Aug-CC-pVTZ) (Hartree): -150.11496264  
129 E(PMP2/Aug-CC-pVTZ) (Hartree): -150.12629332  
130 E(PMP3/Aug-CC-pVTZ) (Hartree): -150.11817226  
131 E(PUHF/Aug-CC-pVTZ) (Hartree): -149.69218984  
132 E(UHF/Aug-CC-pVTZ) (Hartree): -149.68093561  
133 E(CCSD(T)/Aug-CC-pVQZ) (Hartree): -150.17807700  
134 E(CCSD/Aug-CC-pVQZ) (Hartree): -150.15815697  
135 T1 diagnostic: 0.017139  
136 E(MP2/Aug-CC-pVQZ) (Hartree): -150.15917791  
137 E(MP3/Aug-CC-pVQZ) (Hartree): -150.15235332  
138 E(PMP2/Aug-CC-pVQZ) (Hartree): -150.16632728  
139 E(PMP3/Aug-CC-pVQZ) (Hartree): -150.15557017

*Ubiquitous atmospheric production of organic acids: Supplementary Information*

140 E(PUHF/Aug-CC-pVQZ) (Hartree): -149.70270389  
141 E(UHF/Aug-CC-pVQZ) (Hartree): -149.69134411  
142 E(UM062X/Aug-CC-pVQZ) (Hartree): -150.33255017  
143 Point group : D\*H  
144 Electronic state : 3-SGG  
145 Cartesian coordinates (Angs):  
146 O 0.000000 0.000000 0.593860  
147 O 0.000000 0.000000 -0.593860  
148 Rotational constants (GHz): 0.0000000 44.7958175 44.7958175  
149 Vibrational harmonic frequencies (cm-1):  
150 1764.4816 ( SGG)  
151 Zero-point correction (Hartree): 0.004020  
152  
153 HO2  
154 -----  
155 E(CCSD(T)/Aug-CC-pVDZ) (Hartree): -150.59955230  
156 E(CCSD/Aug-CC-pVDZ) (Hartree): -150.58786865  
157 T1 diagnostic: 0.029900  
158 E(MP2/Aug-CC-pVDZ) (Hartree): -150.56825960  
159 E(MP3/Aug-CC-pVDZ) (Hartree): -150.57687421  
160 E(PMP2/Aug-CC-pVDZ) (Hartree): -150.57104087  
161 E(PMP3/Aug-CC-pVDZ) (Hartree): -150.57851097  
162 E(PUHF/Aug-CC-pVDZ) (Hartree): -150.20776121  
163 E(UHF/Aug-CC-pVDZ) (Hartree): -150.20320830  
164 E(CCSD(T)/Aug-CC-pVTZ) (Hartree): -150.72587625  
165 E(CCSD/Aug-CC-pVTZ) (Hartree): -150.70765412  
166 T1 diagnostic: 0.028563  
167 E(MP2/Aug-CC-pVTZ) (Hartree): -150.69252076  
168 E(MP3/Aug-CC-pVTZ) (Hartree): -150.69872991  
169 E(PMP2/Aug-CC-pVTZ) (Hartree): -150.69553578  
170 E(PMP3/Aug-CC-pVTZ) (Hartree): -150.70045929  
171 E(PUHF/Aug-CC-pVTZ) (Hartree): -150.24531381  
172 E(UHF/Aug-CC-pVTZ) (Hartree): -150.24037787  
173 E(CCSD(T)/Aug-CC-pVQZ) (Hartree): -150.76491643  
174 E(CCSD/Aug-CC-pVQZ) (Hartree): -150.74516786  
175 T1 diagnostic: 0.028228  
176 E(MP2/Aug-CC-pVQZ) (Hartree): -150.73404054  
177 E(MP3/Aug-CC-pVQZ) (Hartree): -150.73738063  
178 E(PMP2/Aug-CC-pVQZ) (Hartree): -150.73709048  
179 E(PMP3/Aug-CC-pVQZ) (Hartree): -150.73911347  
180 E(PUHF/Aug-CC-pVQZ) (Hartree): -150.25548760  
181 E(UHF/Aug-CC-pVQZ) (Hartree): -150.25050549  
182 E(UM062X/Aug-CC-pVQZ) (Hartree): -150.91559722  
183 Point group : CS  
184 Electronic state : 2-A"  
185 Cartesian coordinates (Angs):  
186 O 0.054934 0.706553 0.000000  
187 O 0.054934 -0.598328 0.000000  
188 H -0.878945 -0.865806 0.000000  
189 Rotational constants (GHz): 631.3519400 34.8637000 33.0392500  
190 Vibrational harmonic frequencies (cm-1):  
191 1261.0103 ( A') 1462.8452 ( A') 3693.0970 ( A')  
192 Zero-point correction (Hartree): 0.014619  
193  
194 methanediol.mm  
195 -----  
196 E(RM062X/Aug-CC-pVQZ) (Hartree): -190.96721248  
197 Electronic state : 1-A  
198 Cartesian coordinates (Angs):  
199 C 0.000051 0.530467 0.000000  
200 O 1.158799 -0.246531 -0.094017  
201 O -1.158832 -0.246492 0.094033  
202 H 0.003891 1.157073 0.891573  
203 H -0.003820 1.156838 -0.891721  
204 H 1.233486 -0.776278 0.703860  
205 H -1.233596 -0.776251 -0.703835  
206 Rotational constants (GHz): 41.9880400 10.3331200 9.1363100  
207 Vibrational harmonic frequencies (cm-1):  
208 355.5174 376.8627 570.7402  
209 1018.7149 1075.6039 1118.6251  
210 1218.3507 1374.3339 1398.7829

*Ubiquitous atmospheric production of organic acids: Supplementary Information*

211 1458.3559 1542.2453 3073.7287  
212 3121.6784 3869.1883 3870.0049  
213 Zero-point correction (Hartree): 0.057963  
214  
215 methanediol.mt  
216 -----  
217 E(RM062X/Aug-CC-pVQZ) (Hartree): -190.96292783  
218 Electronic state : 1-A  
219 Cartesian coordinates (Angs):  
220 C 0.000018 0.504006 0.093864  
221 O 1.170367 -0.225681 -0.139307  
222 O -1.170203 -0.225779 -0.139471  
223 H -0.000013 0.914823 1.107781  
224 H -0.000139 1.313741 -0.628742  
225 H 1.336943 -0.821026 0.593744  
226 H -1.338218 -0.819885 0.594253  
227 Rotational constants (GHz): 43.4632600 10.0405900 9.0035600  
228 Vibrational harmonic frequencies (cm-1):  
229 171.5193 377.0856 552.0890  
230 1010.2489 1099.9151 1114.2485  
231 1164.9270 1383.1862 1409.9748  
232 1453.0667 1529.9706 3036.2048  
233 3159.2644 3887.4967 3889.1342  
234 Zero-point correction (Hartree): 0.057497  
235  
236 methanediol.pp  
237 -----  
238 E(CCSD(T)/Aug-CC-pVDZ) (Hartree): -190.53807688  
239 E(CCSD/Aug-CC-pVDZ) (Hartree): -190.52127562  
240 T1 diagnostic: 0.013162  
241 E(MP2/Aug-CC-pVDZ) (Hartree): -190.49913172  
242 E(MP3/Aug-CC-pVDZ) (Hartree): -190.51377943  
243 E(RHF/Aug-CC-pVDZ) (Hartree): -189.94565379  
244 E(CCSD(T)/Aug-CC-pVTZ) (Hartree): -190.70756068  
245 E(CCSD/Aug-CC-pVTZ) (Hartree): -190.68199448  
246 T1 diagnostic: 0.011671  
247 E(MP2/Aug-CC-pVTZ) (Hartree): -190.66790063  
248 E(MP3/Aug-CC-pVTZ) (Hartree): -190.67747224  
249 E(RHF/Aug-CC-pVTZ) (Hartree): -189.99338643  
250 E(CCSD(T)/Aug-CC-pVQZ) (Hartree): -190.75857917  
251 E(CCSD/Aug-CC-pVQZ) (Hartree): -190.73099079  
252 T1 diagnostic: 0.011191  
253 E(MP2/Aug-CC-pVQZ) (Hartree): -190.72329798  
254 E(MP3/Aug-CC-pVQZ) (Hartree): -190.72780600  
255 E(RHF/Aug-CC-pVQZ) (Hartree): -190.00581501  
256 E(RM062X/Aug-CC-pVQZ) (Hartree): -190.96721248  
257 Electronic state : 1-A  
258 Cartesian coordinates (Angs):  
259 C -0.000051 0.530467 0.000000  
260 O -1.158799 -0.246531 -0.094017  
261 O 1.158832 -0.246492 0.094033  
262 H 0.003820 1.156838 -0.891721  
263 H -0.003891 1.157073 0.891573  
264 H -1.233486 -0.776278 0.703860  
265 H 1.233596 -0.776251 -0.703835  
266 Rotational constants (GHz): 41.9880400 10.3331200 9.1363100  
267 Vibrational harmonic frequencies (cm-1):  
268 355.5174 376.8627 570.7402  
269 1018.7149 1075.6039 1118.6251  
270 1218.3507 1374.3339 1398.7829  
271 1458.3559 1542.2453 3073.7287  
272 3121.6784 3869.1883 3870.0049  
273 Zero-point correction (Hartree): 0.057963  
274  
275 methanediol.pt  
276 -----  
277 E(RM062X/Aug-CC-pVQZ) (Hartree): -190.96292783  
278 Electronic state : 1-A  
279 Cartesian coordinates (Angs):  
280 C -0.000018 0.504006 0.093864  
281 O -1.170367 -0.225681 -0.139307

*Ubiquitous atmospheric production of organic acids: Supplementary Information*

282 O 1.170203 -0.225779 -0.139471  
283 H 0.000013 0.914823 1.107781  
284 H 0.000139 1.313741 -0.628742  
285 H -1.336943 -0.821026 0.593744  
286 H 1.338218 -0.819885 0.594253  
287 Rotational constants (GHz): 43.4632600 10.0405900 9.0035600  
288 Vibrational harmonic frequencies (cm-1):  
289 171.5193 377.0856 552.0890  
290 1010.2489 1099.9151 1114.2485  
291 1164.9270 1383.1862 1409.9748  
292 1453.0667 1529.9706 3036.2048  
293 3159.2644 3887.4967 3889.1342  
294 Zero-point correction (Hartree): 0.057497  
295  
296 complex.CH2OH.OH.m045090000  
297 -----  
298 E(CCSD(T)/Aug-CC-pVDZ) (Hartree): -266.13417322  
299 E(CCSD/Aug-CC-pVDZ) (Hartree): -266.11303907  
300 T1 diagnostic: 0.014798  
301 E(MP2/Aug-CC-pVDZ) (Hartree): -266.07652450  
302 E(MP3/Aug-CC-pVDZ) (Hartree): -266.10302543  
303 E(PMP2/Aug-CC-pVDZ) (Hartree): -266.07824604  
304 E(PMP3/Aug-CC-pVDZ) (Hartree): -266.10405290  
305 E(PUHF/Aug-CC-pVDZ) (Hartree): -265.35861329  
306 E(UHF/Aug-CC-pVDZ) (Hartree): -265.35571230  
307 E(CCSD(T)/Aug-CC-pVTZ) (Hartree): -266.36501580  
308 E(CCSD/Aug-CC-pVTZ) (Hartree): -266.33256037  
309 T1 diagnostic: 0.012898  
310 E(MP2/Aug-CC-pVTZ) (Hartree): -266.30587952  
311 E(MP3/Aug-CC-pVTZ) (Hartree): -266.32661686  
312 E(PMP2/Aug-CC-pVTZ) (Hartree): -266.30782467  
313 E(PMP3/Aug-CC-pVTZ) (Hartree): -266.32772542  
314 E(PUHF/Aug-CC-pVTZ) (Hartree): -265.42391111  
315 E(UHF/Aug-CC-pVTZ) (Hartree): -265.42059156  
316 E(CCSD(T)/Aug-CC-pVQZ) (Hartree): -266.43467714  
317 E(CCSD/Aug-CC-pVQZ) (Hartree): -266.39958306  
318 T1 diagnostic: 0.012294  
319 E(MP2/Aug-CC-pVQZ) (Hartree): -266.38137057  
320 E(MP3/Aug-CC-pVQZ) (Hartree): -266.39553070  
321 E(PMP2/Aug-CC-pVQZ) (Hartree): -266.38333781  
322 E(PMP3/Aug-CC-pVQZ) (Hartree): -266.39663790  
323 E(PUHF/Aug-CC-pVQZ) (Hartree): -265.44124130  
324 E(UHF/Aug-CC-pVQZ) (Hartree): -265.43788597  
325 E(UM062X/Aug-CC-pVQZ) (Hartree): -266.71717942  
326 Electronic state : 2-A  
327 Cartesian coordinates (Angs):  
328 C 0.984225 0.001418 0.418340  
329 O 0.679593 -1.147384 -0.296430  
330 O 0.430394 1.164865 -0.169675  
331 H 0.579764 -0.022334 1.430221  
332 H 2.069562 0.071562 0.453163  
333 H -0.267068 -1.311982 -0.206887  
334 H 0.802121 1.264286 -1.050504  
335 O -2.069672 -0.096498 0.079302  
336 H -1.412248 0.622092 -0.041605  
337 Rotational constants (GHz): 9.3394600 4.7996800 3.4971000  
338 Vibrational harmonic frequencies (cm-1):  
339 89.4177 140.7120 204.0378  
340 328.1746 432.8619 484.0936  
341 581.0222 648.6334 1023.2507  
342 1052.4519 1126.3971 1225.6086  
343 1379.3239 1419.0160 1458.8735  
344 1537.3712 3079.3999 3134.7653  
345 3583.8392 3801.1150 3864.5973  
346 Zero-point correction (Hartree): 0.069700  
347  
348 complex.CH2OH.OH.b  
349 -----  
350 E(UM062X/Aug-CC-pVQZ) (Hartree): -266.70828175  
351 Electronic state : 2-A  
352 Cartesian coordinates (Angs):

*Ubiquitous atmospheric production of organic acids: Supplementary Information*

353 C 0.837706 0.000026 0.484431  
354 O 0.749880 1.169648 -0.273071  
355 O 0.749991 -1.169632 -0.273055  
356 H 1.822503 0.000087 0.941899  
357 H 0.071659 0.000027 1.271788  
358 H -0.162188 1.286126 -0.551336  
359 H -0.162037 -1.286179 -0.551419  
360 O -1.987277 -0.000013 -0.034690  
361 H -2.696921 -0.000234 0.629019  
362 Rotational constants (GHz): 9.0556400 4.6361700 3.4287200  
363 Vibrational harmonic frequencies (cm-1):  
364 97.0769 121.6565 150.4585  
365 157.8088 215.8763 324.8368  
366 465.9808 569.7526 1018.2417  
367 1098.7561 1118.9527 1178.0766  
368 1377.9407 1434.4446 1449.2279  
369 1526.1918 2976.5106 3149.8753  
370 3767.5232 3868.0322 3871.3198  
371 Zero-point correction (Hartree): 0.068205  
372  
373 TS.CH2OHOH+OH.CHOHOH+H2O.mmc  
374 -----  
375 E(CCSD(T)/Aug-CC-pVDZ) (Hartree): -266.11768459  
376 E(CCSD(T)/Aug-CC-pVDZ) (Hartree): -266.09469541  
377 T1 diagnostic: 0.022049  
378 E(MP2/Aug-CC-pVDZ) (Hartree): -266.05630639  
379 E(MP3/Aug-CC-pVDZ) (Hartree): -266.08079210  
380 E(PMP2/Aug-CC-pVDZ) (Hartree): -266.05973456  
381 E(PMP3/Aug-CC-pVDZ) (Hartree): -266.08296100  
382 E(PUHF/Aug-CC-pVDZ) (Hartree): -265.32906214  
383 E(UHF/Aug-CC-pVDZ) (Hartree): -265.32389709  
384 E(CCSD(T)/Aug-CC-pVTZ) (Hartree): -266.34862710  
385 E(CCSD(T)/Aug-CC-pVTZ) (Hartree): -266.31395330  
386 T1 diagnostic: 0.020504  
387 E(MP2/Aug-CC-pVTZ) (Hartree): -266.28585174  
388 E(MP3/Aug-CC-pVTZ) (Hartree): -266.30439770  
389 E(PMP2/Aug-CC-pVTZ) (Hartree): -266.28950597  
390 E(PMP3/Aug-CC-pVTZ) (Hartree): -266.30666527  
391 E(PUHF/Aug-CC-pVTZ) (Hartree): -265.39443380  
392 E(UHF/Aug-CC-pVTZ) (Hartree): -265.38890805  
393 E(CCSD(T)/Aug-CC-pVQZ) (Hartree): -266.41856723  
394 E(CCSD(T)/Aug-CC-pVQZ) (Hartree): -266.38115775  
395 T1 diagnostic: 0.020156  
396 E(MP2/Aug-CC-pVQZ) (Hartree): -266.36155131  
397 E(MP3/Aug-CC-pVQZ) (Hartree): -266.37348719  
398 E(PMP2/Aug-CC-pVQZ) (Hartree): -266.36522921  
399 E(PMP3/Aug-CC-pVQZ) (Hartree): -266.37575557  
400 E(PUHF/Aug-CC-pVQZ) (Hartree): -265.41174746  
401 E(UHF/Aug-CC-pVQZ) (Hartree): -265.40618733  
402 E(UM062X/Aug-CC-pVQZ) (Hartree): -266.70109970  
403 Electronic state : 2-A  
404 Cartesian coordinates (Angs):  
405 C -0.419900 -0.020575 0.427827  
406 O -1.177376 -0.975805 -0.228579  
407 O -0.562377 1.255006 -0.091128  
408 H -0.627495 0.039516 1.496787  
409 H 0.669320 -0.380245 0.297769  
410 H -2.110258 -0.774567 -0.106505  
411 H -0.366304 1.216577 -1.033043  
412 O 2.078829 -0.346309 -0.108121  
413 H 2.241530 0.559028 0.200654  
414 Rotational constants (GHz): 9.7863500 4.3619700 3.2830800  
415 Vibrational harmonic frequencies (cm-1):  
416 i732.2989 94.8260 100.7240  
417 148.7988 260.4144 435.8889  
418 568.8398 688.3313 932.9939  
419 1070.1660 1143.8474 1177.0702  
420 1298.9764 1347.7045 1427.7200  
421 1430.7686 1684.4065 3094.0464  
422 3780.3232 3842.3489 3846.4247  
423 Zero-point correction (Hartree): 0.064642



*Ubiquitous atmospheric production of organic acids: Supplementary Information*

424  
425 TS.CH2OHOH+OH.CHOHOH+H2O.mtp  
426 -----  
427 E(CCSD(T)/Aug-CC-pVDZ) (Hartree): -266.11533231  
428 E(CCSD/Aug-CC-pVDZ) (Hartree): -266.09252655  
429 T1 diagnostic: 0.022326  
430 E(MP2/Aug-CC-pVDZ) (Hartree): -266.05368739  
431 E(MP3/Aug-CC-pVDZ) (Hartree): -266.07869193  
432 E(PMP2/Aug-CC-pVDZ) (Hartree): -266.05693536  
433 E(PMP3/Aug-CC-pVDZ) (Hartree): -266.08076460  
434 E(PUHF/Aug-CC-pVDZ) (Hartree): -265.32813523  
435 E(UHF/Aug-CC-pVDZ) (Hartree): -265.32321995  
436 E(CCSD(T)/Aug-CC-pVTZ) (Hartree): -266.34634313  
437 E(CCSD/Aug-CC-pVTZ) (Hartree): -266.31189245  
438 T1 diagnostic: 0.020718  
439 E(MP2/Aug-CC-pVTZ) (Hartree): -266.28332371  
440 E(MP3/Aug-CC-pVTZ) (Hartree): -266.30242508  
441 E(PMP2/Aug-CC-pVTZ) (Hartree): -266.28679511  
442 E(PMP3/Aug-CC-pVTZ) (Hartree): -266.30459456  
443 E(PUHF/Aug-CC-pVTZ) (Hartree): -265.39358937  
444 E(UHF/Aug-CC-pVTZ) (Hartree): -265.38831306  
445 E(CCSD(T)/Aug-CC-pVQZ) (Hartree): -266.41633600  
446 E(CCSD/Aug-CC-pVQZ) (Hartree): -266.37916049  
447 T1 diagnostic: 0.020351  
448 E(MP2/Aug-CC-pVQZ) (Hartree): -266.35908196  
449 E(MP3/Aug-CC-pVQZ) (Hartree): -266.37158672  
450 E(PMP2/Aug-CC-pVQZ) (Hartree): -266.36257618  
451 E(PMP3/Aug-CC-pVQZ) (Hartree): -266.37375654  
452 E(PUHF/Aug-CC-pVQZ) (Hartree): -265.41093648  
453 E(UHF/Aug-CC-pVQZ) (Hartree): -265.40562672  
454 E(UM062X/Aug-CC-pVQZ) (Hartree): -266.69912344  
455 Electronic state : 2-A  
456 Cartesian coordinates (Angs):  
457 C 0.416747 -0.043122 0.427351  
458 O 0.393155 1.231124 -0.101372  
459 O 1.295401 -0.824931 -0.312112  
460 H 0.667413 -0.051813 1.495309  
461 H -0.662786 -0.426927 0.334578  
462 H 1.297706 1.506781 -0.278789  
463 H 1.425029 -1.671062 0.122654  
464 O -2.092790 -0.355097 -0.052033  
465 H -1.993967 0.492979 -0.513722  
466 Rotational constants (GHz): 10.2471800 4.3293500 3.3064800  
467 Vibrational harmonic frequencies (cm-1):  
468 i751.9233 82.3990 116.2714  
469 209.3149 239.1373 249.1363  
470 548.0837 717.0357 967.8039  
471 1078.2452 1145.7546 1165.2020  
472 1269.1015 1341.4747 1418.3328  
473 1481.1348 1809.7659 3010.0160  
474 3776.4984 3852.1978 3886.7762  
475 Zero-point correction (Hartree): 0.064617  
476  
477 TS.CH2OHOH+OH.CHOHOH+H2O.ppl  
478 -----  
479 E(CCSD(T)/Aug-CC-pVDZ) (Hartree): -266.11971065  
480 E(CCSD/Aug-CC-pVDZ) (Hartree): -266.09647171  
481 T1 diagnostic: 0.022425  
482 E(MP2/Aug-CC-pVDZ) (Hartree): -266.05825816  
483 E(MP3/Aug-CC-pVDZ) (Hartree): -266.08232261  
484 E(PMP2/Aug-CC-pVDZ) (Hartree): -266.06186573  
485 E(PMP3/Aug-CC-pVDZ) (Hartree): -266.08458766  
486 E(PUHF/Aug-CC-pVDZ) (Hartree): -265.32945690  
487 E(UHF/Aug-CC-pVDZ) (Hartree): -265.32402936  
488 E(CCSD(T)/Aug-CC-pVTZ) (Hartree): -266.35076038  
489 E(CCSD/Aug-CC-pVTZ) (Hartree): -266.31578375  
490 T1 diagnostic: 0.020915  
491 E(MP2/Aug-CC-pVTZ) (Hartree): -266.28786969  
492 E(MP3/Aug-CC-pVTZ) (Hartree): -266.30598913  
493 E(PMP2/Aug-CC-pVTZ) (Hartree): -266.29170135  
494 E(PMP3/Aug-CC-pVTZ) (Hartree): -266.30835239

## Ubiquitous atmospheric production of organic acids: Supplementary Information

495 E(PUHF/Aug-CC-pVTZ) (Hartree): -265.39469537  
496 E(UHF/Aug-CC-pVTZ) (Hartree): -265.38891382  
497 E(CCSD(T)/Aug-CC-pVQZ) (Hartree): -266.42078558  
498 E(CCSD/Aug-CC-pVQZ) (Hartree): -266.38305985  
499 T1 diagnostic: 0.020574  
500 E(MP2/Aug-CC-pVQZ) (Hartree): -266.36364560  
501 E(MP3/Aug-CC-pVQZ) (Hartree): -266.37515676  
502 E(PMP2/Aug-CC-pVQZ) (Hartree): -266.36750137  
503 E(PMP3/Aug-CC-pVQZ) (Hartree): -266.37752112  
504 E(PUHF/Aug-CC-pVQZ) (Hartree): -265.41200581  
505 E(UHF/Aug-CC-pVQZ) (Hartree): -265.40618963  
506 E(UM062X/Aug-CC-pVQZ) (Hartree): -266.70372012  
507 Electronic state : 2-A  
508 Cartesian coordinates (Angs):  
509 C -0.464353 -0.007938 0.486081  
510 O -1.079242 -1.042857 -0.180692  
511 O -0.501879 1.203804 -0.199370  
512 H -0.897225 0.052460 1.484946  
513 H 0.669502 -0.228604 0.591293  
514 H -0.603812 -1.200153 -1.003288  
515 H -1.419295 1.454425 -0.343426  
516 O 1.973941 -0.245312 -0.025084  
517 H 1.894390 0.644420 -0.404839  
518 Rotational constants (GHz): 9.4541400 4.9200400 3.5985200  
519 Vibrational harmonic frequencies (cm-1):  
520 i868.0321 69.7365 140.9234  
521 272.0113 291.2540 415.1330  
522 572.3868 733.4673 872.0630  
523 1070.1260 1158.7311 1229.9810  
524 1289.8284 1369.6142 1378.7452  
525 1432.8406 1794.2785 3098.5934  
526 3776.3678 3840.1689 3851.8829  
527 Zero-point correction (Hartree): 0.065288  
528  
529 IRC information available.  
530 IRCMax information available :  
531 E(CCSD(T)/Aug-CC-pVDZ) (Hartree): -266.11927158  
532 E(CCSD/Aug-CC-pVDZ) (Hartree): -266.09521375  
533 T1 diagnostic: 0.024052  
534 E(MP2/Aug-CC-pVDZ) (Hartree): -266.05730953  
535 E(MP3/Aug-CC-pVDZ) (Hartree): -266.07972659  
536 E(PMP2/Aug-CC-pVDZ) (Hartree): -266.06244655  
537 E(PMP3/Aug-CC-pVDZ) (Hartree): -266.08285606  
538 E(PUHF/Aug-CC-pVDZ) (Hartree): -265.32375482  
539 E(UHF/Aug-CC-pVDZ) (Hartree): -265.31622154  
540 E(CCSD(T)/Aug-CC-pVQZ) (Hartree): -266.42040646  
541 E(CCSD/Aug-CC-pVQZ) (Hartree): -266.38160440  
542 T1 diagnostic: 0.022388  
543 E(MP2/Aug-CC-pVQZ) (Hartree): -266.36262403  
544 E(MP3/Aug-CC-pVQZ) (Hartree): -266.37234426  
545 E(PMP2/Aug-CC-pVQZ) (Hartree): -266.36801562  
546 E(PMP3/Aug-CC-pVQZ) (Hartree): -266.37557970  
547 E(PUHF/Aug-CC-pVQZ) (Hartree): -265.40609187  
548 E(UHF/Aug-CC-pVQZ) (Hartree): -265.39818848  
549 E(CCSD(T)/Aug-CC-pVTZ) (Hartree): -266.35032121  
550 E(CCSD/Aug-CC-pVTZ) (Hartree): -266.31430793  
551 T1 diagnostic: 0.022681  
552 E(MP2/Aug-CC-pVTZ) (Hartree): -266.28682524  
553 E(MP3/Aug-CC-pVTZ) (Hartree): -266.30316792  
554 E(PMP2/Aug-CC-pVTZ) (Hartree): -266.29218803  
555 E(PMP3/Aug-CC-pVTZ) (Hartree): -266.30640017  
556 E(PUHF/Aug-CC-pVTZ) (Hartree): -265.38879541  
557 E(UHF/Aug-CC-pVTZ) (Hartree): -265.38093097  
558 Electronic state : 2-A  
559 Cartesian coordinates (Angs):  
560 C -0.462746 -0.008221 0.483198  
561 O -1.078254 -1.042458 -0.176438  
562 O -0.504653 1.203085 -0.196163  
563 H -0.866590 0.045307 1.494406  
564 H 0.729674 -0.228649 0.544965  
565 H -0.613362 -1.194887 -1.006766

*Ubiquitous atmospheric production of organic acids: Supplementary Information*

566 H -1.423081 1.453171 -0.339137  
567 O 1.964310 -0.244315 -0.025491  
568 H 1.898612 0.643887 -0.407925  
569 Rotational constants (GHz): 9.4827684 4.9508727 3.6142439  
570  
571 TS.CH2OHOH+OH.CHOHOH+H2O.ptm  
572 -----  
573 E(CCSD(T)/Aug-CC-pVDZ) (Hartree): -266.11861994  
574 E(CCSD/Aug-CC-pVDZ) (Hartree): -266.09572252  
575 T1 diagnostic: 0.023774  
576 E(MP2/Aug-CC-pVDZ) (Hartree): -266.05652866  
577 E(MP3/Aug-CC-pVDZ) (Hartree): -266.08189360  
578 E(PMP2/Aug-CC-pVDZ) (Hartree): -266.05938441  
579 E(PMP3/Aug-CC-pVDZ) (Hartree): -266.08378843  
580 E(PUHF/Aug-CC-pVDZ) (Hartree): -265.33203824  
581 E(UHF/Aug-CC-pVDZ) (Hartree): -265.32773847  
582 E(CCSD(T)/Aug-CC-pVTZ) (Hartree): -266.34976088  
583 E(CCSD/Aug-CC-pVTZ) (Hartree): -266.31523651  
584 T1 diagnostic: 0.022087  
585 E(MP2/Aug-CC-pVTZ) (Hartree): -266.28628998  
586 E(MP3/Aug-CC-pVTZ) (Hartree): -266.30577579  
587 E(PMP2/Aug-CC-pVTZ) (Hartree): -266.28937114  
588 E(PMP3/Aug-CC-pVTZ) (Hartree): -266.30776896  
589 E(PUHF/Aug-CC-pVTZ) (Hartree): -265.39758268  
590 E(UHF/Aug-CC-pVTZ) (Hartree): -265.39291284  
591 E(CCSD(T)/Aug-CC-pVQZ) (Hartree): -266.41969725  
592 E(CCSD/Aug-CC-pVQZ) (Hartree): -266.38244934  
593 T1 diagnostic: 0.021727  
594 E(MP2/Aug-CC-pVQZ) (Hartree): -266.36198453  
595 E(MP3/Aug-CC-pVQZ) (Hartree): -266.37487763  
596 E(PMP2/Aug-CC-pVQZ) (Hartree): -266.36508829  
597 E(PMP3/Aug-CC-pVQZ) (Hartree): -266.37687041  
598 E(PUHF/Aug-CC-pVQZ) (Hartree): -265.41494015  
599 E(UHF/Aug-CC-pVQZ) (Hartree): -265.41023645  
600 E(UM062X/Aug-CC-pVQZ) (Hartree): -266.70269575  
601 Electronic state : 2-A  
602 Cartesian coordinates (Angs):  
603 C -0.503384 -0.026642 0.462162  
604 O -1.470341 -0.772920 -0.174428  
605 O -0.328474 1.216793 -0.125290  
606 H -0.794696 0.054477 1.509876  
607 H 0.503308 -0.559474 0.415529  
608 H -1.352913 -0.668234 -1.123713  
609 H 0.596023 1.292205 -0.382953  
610 O 1.996650 -0.358138 -0.175604  
611 H 2.485896 -0.644999 0.610867  
612 Rotational constants (GHz): 10.9443700 4.1958700 3.3557400  
613 Vibrational harmonic frequencies (cm-1):  
614 i608.0189 50.2692 133.6232  
615 168.9483 337.9629 372.4144  
616 565.9008 610.3591 896.0893  
617 1052.1954 1163.0855 1203.7661  
618 1304.0426 1360.1867 1425.6484  
619 1463.4284 2146.3320 3093.4452  
620 3788.8158 3836.6566 3853.8969  
621 Zero-point correction (Hartree): 0.065673  
622  
623 IRC information available.  
624 IRCMax information available :  
625 E(CCSD(T)/Aug-CC-pVDZ) (Hartree): -266.11848401  
626 E(CCSD/Aug-CC-pVDZ) (Hartree): -266.09478659  
627 T1 diagnostic: 0.026562  
628 E(MP2/Aug-CC-pVDZ) (Hartree): -266.05495178  
629 E(MP3/Aug-CC-pVDZ) (Hartree): -266.07938067  
630 E(PMP2/Aug-CC-pVDZ) (Hartree): -266.05862904  
631 E(PMP3/Aug-CC-pVDZ) (Hartree): -266.08180675  
632 E(PUHF/Aug-CC-pVDZ) (Hartree): -265.32705797  
633 E(UHF/Aug-CC-pVDZ) (Hartree): -265.32168706  
634 E(CCSD(T)/Aug-CC-pVQZ) (Hartree): -266.41954609  
635 E(CCSD/Aug-CC-pVQZ) (Hartree): -266.38129083  
636 T1 diagnostic: 0.024632

*Ubiquitous atmospheric production of organic acids: Supplementary Information*

637 E(MP2/Aug-CC-pVQZ) (Hartree): -266.36030944  
638 E(MP3/Aug-CC-pVQZ) (Hartree): -266.37218751  
639 E(PMP2/Aug-CC-pVQZ) (Hartree): -266.36423574  
640 E(PMP3/Aug-CC-pVQZ) (Hartree): -266.37471725  
641 E(PUHF/Aug-CC-pVQZ) (Hartree): -265.40978494  
642 E(UHF/Aug-CC-pVQZ) (Hartree): -265.40403187  
643 E(CCSD(T)/Aug-CC-pVTZ) (Hartree): -266.34954542  
644 E(CCSD/Aug-CC-pVTZ) (Hartree): -266.31405175  
645 T1 diagnostic: 0.024945  
646 E(MP2/Aug-CC-pVTZ) (Hartree): -266.28458666  
647 E(MP3/Aug-CC-pVTZ) (Hartree): -266.30306746  
648 E(PMP2/Aug-CC-pVTZ) (Hartree): -266.28848875  
649 E(PMP3/Aug-CC-pVTZ) (Hartree): -266.30559633  
650 E(PUHF/Aug-CC-pVTZ) (Hartree): -265.39244225  
651 E(UHF/Aug-CC-pVTZ) (Hartree): -265.38672354  
652 Electronic state : 2-A  
653 Cartesian coordinates (Angs):  
654 C -0.498105 -0.027724 0.457412  
655 O -1.465279 -0.773387 -0.169270  
656 O -0.331507 1.216166 -0.121981  
657 H -0.759000 0.031800 1.514953  
658 H 0.557320 -0.542632 0.372025  
659 H -1.364880 -0.658225 -1.120075  
660 H 0.596054 1.299331 -0.371700  
661 O 1.981936 -0.357457 -0.176647  
662 H 2.477941 -0.646503 0.603498  
663 Rotational constants (GHz): 10.9840910 4.2432726 3.3837155  
664  
665 TS.CH2OHOH+OH.CHOHOH+H2O.tmt  
666 -----  
667 E(CCSD(T)/Aug-CC-pVDZ) (Hartree): -266.11874987  
668 E(CCSD/Aug-CC-pVDZ) (Hartree): -266.09577815  
669 T1 diagnostic: 0.023668  
670 E(MP2/Aug-CC-pVDZ) (Hartree): -266.05680209  
671 E(MP3/Aug-CC-pVDZ) (Hartree): -266.08191914  
672 E(PMP2/Aug-CC-pVDZ) (Hartree): -266.05974867  
673 E(PMP3/Aug-CC-pVDZ) (Hartree): -266.08385743  
674 E(PUHF/Aug-CC-pVDZ) (Hartree): -265.33127300  
675 E(UHF/Aug-CC-pVDZ) (Hartree): -265.32683806  
676 E(CCSD(T)/Aug-CC-pVTZ) (Hartree): -266.34981101  
677 E(CCSD/Aug-CC-pVTZ) (Hartree): -266.31519681  
678 T1 diagnostic: 0.022047  
679 E(MP2/Aug-CC-pVTZ) (Hartree): -266.28646597  
680 E(MP3/Aug-CC-pVTZ) (Hartree): -266.30568729  
681 E(PMP2/Aug-CC-pVTZ) (Hartree): -266.28963919  
682 E(PMP3/Aug-CC-pVTZ) (Hartree): -266.30772483  
683 E(PUHF/Aug-CC-pVTZ) (Hartree): -265.39670208  
684 E(UHF/Aug-CC-pVTZ) (Hartree): -265.39189754  
685 E(CCSD(T)/Aug-CC-pVQZ) (Hartree): -266.41979151  
686 E(CCSD/Aug-CC-pVQZ) (Hartree): -266.38244524  
687 T1 diagnostic: 0.021699  
688 E(MP2/Aug-CC-pVQZ) (Hartree): -266.36219093  
689 E(MP3/Aug-CC-pVQZ) (Hartree): -266.37481912  
690 E(PMP2/Aug-CC-pVQZ) (Hartree): -266.36538736  
691 E(PMP3/Aug-CC-pVQZ) (Hartree): -266.37685679  
692 E(PUHF/Aug-CC-pVQZ) (Hartree): -265.41405370  
693 E(UHF/Aug-CC-pVQZ) (Hartree): -265.40921470  
694 E(UM062X/Aug-CC-pVQZ) (Hartree): -266.70282831  
695 Electronic state : 2-A  
696 Cartesian coordinates (Angs):  
697 C 0.544406 0.039195 0.495890  
698 O 0.548112 1.230489 -0.203068  
699 O 1.114650 -1.018220 -0.190587  
700 H 1.085968 0.150066 1.433296  
701 H -0.545454 -0.199383 0.738204  
702 H -0.305029 1.324710 -0.639244  
703 H 0.797995 -0.997312 -1.098586  
704 O -1.934806 -0.140243 -0.035534  
705 H -2.123574 -1.089453 0.024509  
706 Rotational constants (GHz): 9.4339100 4.8897300 3.6093300  
707 Vibrational harmonic frequencies (cm-1):

*Ubiquitous atmospheric production of organic acids: Supplementary Information*

708 i757.5397 49.8965 119.8157  
709 158.8087 305.2701 391.1876  
710 556.9512 638.9943 834.1525  
711 1064.0216 1161.5435 1221.3069  
712 1301.3903 1378.3051 1416.3807  
713 1449.4450 2133.3364 3124.0616  
714 3787.9928 3837.4429 3857.3877  
715 Zero-point correction (Hartree): 0.065583  
716  
717 IRC information available.  
718 IRCMax information available :  
719 E(CCSD(T)/Aug-CC-pVDZ) (Hartree): -266.11858999  
720 E(CCSD(T)/Aug-CC-pVDZ) (Hartree): -266.09514409  
721 T1 diagnostic: 0.025275  
722 E(MP2/Aug-CC-pVDZ) (Hartree): -266.05581407  
723 E(MP3/Aug-CC-pVDZ) (Hartree): -266.08035638  
724 E(PMP2/Aug-CC-pVDZ) (Hartree): -266.05924974  
725 E(PMP3/Aug-CC-pVDZ) (Hartree): -266.08260889  
726 E(PUHF/Aug-CC-pVDZ) (Hartree): -265.32820576  
727 E(UHF/Aug-CC-pVDZ) (Hartree): -265.32312818  
728 E(CCSD(T)/Aug-CC-pVQZ) (Hartree): -266.41964081  
729 E(CCSD(T)/Aug-CC-pVQZ) (Hartree): -266.38169744  
730 T1 diagnostic: 0.023364  
731 E(MP2/Aug-CC-pVQZ) (Hartree): -266.36116707  
732 E(MP3/Aug-CC-pVQZ) (Hartree): -266.37317260  
733 E(PMP2/Aug-CC-pVQZ) (Hartree): -266.36485369  
734 E(PMP3/Aug-CC-pVQZ) (Hartree): -266.37552806  
735 E(PUHF/Aug-CC-pVQZ) (Hartree): -265.41088425  
736 E(UHF/Aug-CC-pVQZ) (Hartree): -265.40541523  
737 E(CCSD(T)/Aug-CC-pVTZ) (Hartree): -266.34961506  
738 E(CCSD(T)/Aug-CC-pVTZ) (Hartree): -266.31442670  
739 T1 diagnostic: 0.023685  
740 E(MP2/Aug-CC-pVTZ) (Hartree): -266.28541732  
741 E(MP3/Aug-CC-pVTZ) (Hartree): -266.30402219  
742 E(PMP2/Aug-CC-pVTZ) (Hartree): -266.28907972  
743 E(PMP3/Aug-CC-pVTZ) (Hartree): -266.30637679  
744 E(PUHF/Aug-CC-pVTZ) (Hartree): -265.39354102  
745 E(UHF/Aug-CC-pVTZ) (Hartree): -265.38810684  
746 Electronic state : 2-A  
747 Cartesian coordinates (Angs):  
748 C 0.541261 0.038246 0.493329  
749 O 0.549019 1.230382 -0.200026  
750 O 1.115003 -1.016833 -0.187515  
751 H 1.061859 0.142601 1.443522  
752 H -0.578250 -0.197944 0.702944  
753 H -0.302892 1.326176 -0.639766  
754 H 0.804907 -0.995748 -1.098216  
755 O -1.927697 -0.140624 -0.036053  
756 H -2.123794 -1.087958 0.020291  
757 Rotational constants (GHz): 9.4591381 4.9157631 3.6225656  
758  
759 CHOH.OH.mm  
760 -----  
761 E(UM062X/Aug-CC-pVQZ) (Hartree): -190.30284411  
762 Electronic state : 2-A  
763 Cartesian coordinates (Angs):  
764 C -0.009263 0.506935 -0.151629  
765 O -1.168687 -0.160517 0.084666  
766 O 1.133148 -0.232938 -0.077244  
767 H -0.007531 1.497483 0.284884  
768 H -1.081379 -1.051090 -0.269918  
769 H 1.428798 -0.340357 0.835423  
770 Rotational constants (GHz): 55.3908600 10.7691500 9.4371800  
771 Vibrational harmonic frequencies (cm-1):  
772 57.3154 391.9774 559.2706  
773 826.1288 1084.3230 1216.9428  
774 1220.6268 1291.4609 1421.8864  
775 3180.9538 3751.3297 3852.3624  
776 Zero-point correction (Hartree): 0.042954  
777  
778 CHOH.OH.mt

*Ubiquitous atmospheric production of organic acids: Supplementary Information*

779 -----  
780 E(UM062X/Aug-CC-pVQZ) (Hartree): -190.30548854  
781 Electronic state : 2-A  
782 Cartesian coordinates (Angs):  
783 C 0.003915 0.505672 0.147268  
784 O 1.173715 -0.139887 -0.053708  
785 O -1.076518 -0.309480 -0.079792  
786 H -0.008027 1.487976 -0.315307  
787 H 1.076969 -1.046960 0.252996  
788 H -1.870013 0.119882 0.246701  
789 Rotational constants (GHz): 57.1698300 11.0170300 9.4336700  
790 Vibrational harmonic frequencies (cm-1):  
791 276.0525 340.4898 546.6847  
792 945.8457 1089.0453 1160.6999  
793 1220.9512 1371.8299 1429.0547  
794 3133.9673 3854.2030 3897.1603  
795 Zero-point correction (Hartree): 0.043891  
796  
797 CHOHOH.pp  
798 -----  
799 E(UM062X/Aug-CC-pVQZ) (Hartree): -190.30284418  
800 Electronic state : 2-A  
801 Cartesian coordinates (Angs):  
802 C 0.009265 0.506887 -0.151704  
803 O -1.133101 -0.233056 -0.077222  
804 O 1.168725 -0.160474 0.084689  
805 H 0.007467 1.497490 0.284679  
806 H -1.429404 -0.339392 0.835351  
807 H 1.081353 -1.051182 -0.269537  
808 Rotational constants (GHz): 55.3944900 10.7688700 9.4370000  
809 Vibrational harmonic frequencies (cm-1):  
810 60.8695 391.8915 559.2661  
811 826.1119 1084.3453 1216.8415  
812 1220.6000 1291.5289 1421.9214  
813 3180.9706 3751.4833 3852.3811  
814 Zero-point correction (Hartree): 0.042962  
815  
816 CHOHOH.tp  
817 -----  
818 E(CCSD(T)/Aug-CC-pVDZ) (Hartree): -189.87779943  
819 E(CCSD/Aug-CC-pVDZ) (Hartree): -189.86154507  
820 T1 diagnostic: 0.017288  
821 E(MP2/Aug-CC-pVDZ) (Hartree): -189.84049088  
822 E(MP3/Aug-CC-pVDZ) (Hartree): -189.85314286  
823 E(PMP2/Aug-CC-pVDZ) (Hartree): -189.84187985  
824 E(PMP3/Aug-CC-pVDZ) (Hartree): -189.85397301  
825 E(PUHF/Aug-CC-pVDZ) (Hartree): -189.32092402  
826 E(UHF/Aug-CC-pVDZ) (Hartree): -189.31859388  
827 E(CCSD(T)/Aug-CC-pVTZ) (Hartree): -190.04298060  
828 E(CCSD/Aug-CC-pVTZ) (Hartree): -190.01809951  
829 T1 diagnostic: 0.015983  
830 E(MP2/Aug-CC-pVTZ) (Hartree): -190.00428703  
831 E(MP3/Aug-CC-pVTZ) (Hartree): -190.01250374  
832 E(PMP2/Aug-CC-pVTZ) (Hartree): -190.00575607  
833 E(PMP3/Aug-CC-pVTZ) (Hartree): -190.01335995  
834 E(PUHF/Aug-CC-pVTZ) (Hartree): -189.36838198  
835 E(UHF/Aug-CC-pVTZ) (Hartree): -189.36591438  
836 E(CCSD(T)/Aug-CC-pVQZ) (Hartree): -190.09328043  
837 E(CCSD/Aug-CC-pVQZ) (Hartree): -190.06639701  
838 T1 diagnostic: 0.015533  
839 E(MP2/Aug-CC-pVQZ) (Hartree): -190.05851869  
840 E(MP3/Aug-CC-pVQZ) (Hartree): -190.06215484  
841 E(PMP2/Aug-CC-pVQZ) (Hartree): -190.06000364  
842 E(PMP3/Aug-CC-pVQZ) (Hartree): -190.06301110  
843 E(PUHF/Aug-CC-pVQZ) (Hartree): -189.38089068  
844 E(UHF/Aug-CC-pVQZ) (Hartree): -189.37839919  
845 E(UM062X/Aug-CC-pVQZ) (Hartree): -190.30548856  
846 Electronic state : 2-A  
847 Cartesian coordinates (Angs):  
848 C -0.003867 0.505686 0.147243  
849 O 1.076446 -0.309534 -0.079674

*Ubiquitous atmospheric production of organic acids: Supplementary Information*

850 O -1.173674 -0.139863 -0.053754  
851 H 0.008089 1.487913 -0.315498  
852 H 1.870045 0.120020 0.246297  
853 H -1.077106 -1.046876 0.253167  
854 Rotational constants (GHz): 57.1702000 11.0179200 9.4343000  
855 Vibrational harmonic frequencies (cm-1):  
856 275.6855 340.3432 546.7052  
857 945.9116 1089.1348 1160.7716  
858 1220.9928 1371.8201 1429.0947  
859 3133.9323 3854.2691 3897.2323  
860 Zero-point correction (Hartree): 0.043891  
861  
862 CHOHOH.tt  
863 -----  
864 E(UM062X/Aug-CC-pVQZ) (Hartree): -190.30159363  
865 Electronic state : 2-A  
866 Cartesian coordinates (Angs):  
867 C -0.000040 0.477142 -0.124970  
868 O -1.103653 -0.298640 0.034607  
869 O 1.103701 -0.298584 0.034827  
870 H -0.000072 1.435603 0.398906  
871 H -1.885219 0.239710 -0.101761  
872 H 1.885141 0.239632 -0.102803  
873 Rotational constants (GHz): 62.3352300 10.8685800 9.3816200  
874 Vibrational harmonic frequencies (cm-1):  
875 167.5695 336.8171 544.6949  
876 959.4974 1097.4517 1133.4395  
877 1250.6366 1357.1143 1442.7841  
878 3041.4734 3910.1273 3910.3107  
879 Zero-point correction (Hartree): 0.043631  
880  
881 TS.CH2OHOH+OH.CH2OHO+H2O.mmt  
882 -----  
883 E(CCSD(T)/Aug-CC-pVDZ) (Hartree): -266.11391085  
884 E(CCSD/Aug-CC-pVDZ) (Hartree): -266.08899476  
885 T1 diagnostic: 0.024883  
886 E(MP2/Aug-CC-pVDZ) (Hartree): -266.05153549  
887 E(MP3/Aug-CC-pVDZ) (Hartree): -266.07312310  
888 E(PMP2/Aug-CC-pVDZ) (Hartree): -266.05746070  
889 E(PMP3/Aug-CC-pVDZ) (Hartree): -266.07644834  
890 E(PUHF/Aug-CC-pVDZ) (Hartree): -265.31649796  
891 E(UHF/Aug-CC-pVDZ) (Hartree): -265.30762906  
892 E(CCSD(T)/Aug-CC-pVTZ) (Hartree): -266.34618953  
893 E(CCSD/Aug-CC-pVTZ) (Hartree): -266.30919097  
894 T1 diagnostic: 0.023721  
895 E(MP2/Aug-CC-pVTZ) (Hartree): -266.28216054  
896 E(MP3/Aug-CC-pVTZ) (Hartree): -266.29768855  
897 E(PMP2/Aug-CC-pVTZ) (Hartree): -266.28825652  
898 E(PMP3/Aug-CC-pVTZ) (Hartree): -266.30108562  
899 E(PUHF/Aug-CC-pVTZ) (Hartree): -265.38234429  
900 E(UHF/Aug-CC-pVTZ) (Hartree): -265.37322096  
901 E(CCSD(T)/Aug-CC-pVQZ) (Hartree): -266.41581300  
902 E(CCSD/Aug-CC-pVQZ) (Hartree): -266.37600498  
903 T1 diagnostic: 0.023343  
904 E(MP2/Aug-CC-pVQZ) (Hartree): -266.35758850  
905 E(MP3/Aug-CC-pVQZ) (Hartree): -266.36645384  
906 E(PMP2/Aug-CC-pVQZ) (Hartree): -266.36371329  
907 E(PMP3/Aug-CC-pVQZ) (Hartree): -266.36984924  
908 E(PUHF/Aug-CC-pVQZ) (Hartree): -265.39948416  
909 E(UHF/Aug-CC-pVQZ) (Hartree): -265.39032266  
910 E(UM062X/Aug-CC-pVQZ) (Hartree): -266.70091173  
911 Electronic state : 2-A  
912 Cartesian coordinates (Angs):  
913 C -0.865718 0.371526 0.377010  
914 O -1.092017 -0.923746 -0.107341  
915 O 0.103469 1.046530 -0.338523  
916 H -1.761860 0.996247 0.294692  
917 H -0.595134 0.255492 1.426061  
918 H -1.386329 -0.864016 -1.020592  
919 H 1.083422 0.572848 -0.165998  
920 O 1.814703 -0.378152 0.104033

*Ubiquitous atmospheric production of organic acids: Supplementary Information*

921 H 1.244962 -1.146778 -0.061573  
922 Rotational constants (GHz): 11.0706000 5.2570700 3.9573500  
923 Vibrational harmonic frequencies (cm-1):  
924 i1664.7095 131.8599 217.1876  
925 319.2797 414.7191 447.5109  
926 586.8123 729.3837 886.6551  
927 1044.2648 1079.4543 1108.2246  
928 1258.9999 1360.0263 1433.7718  
929 1496.8542 1574.0439 3029.7199  
930 3112.0365 3767.0294 3862.0706  
931 Zero-point correction (Hartree): 0.063470  
932  
933 IRC information available.  
934 IRCMax information available :  
935 E(CCSD(T)/Aug-CC-pVDZ) (Hartree): -266.11371678  
936 E(CCSD/Aug-CC-pVDZ) (Hartree): -266.08854881  
937 T1 diagnostic: 0.023695  
938 E(MP2/Aug-CC-pVDZ) (Hartree): -266.05162667  
939 E(MP3/Aug-CC-pVDZ) (Hartree): -266.07268904  
940 E(PMP2/Aug-CC-pVDZ) (Hartree): -266.05892657  
941 E(PMP3/Aug-CC-pVDZ) (Hartree): -266.07666319  
942 E(PUHF/Aug-CC-pVDZ) (Hartree): -265.31530785  
943 E(UHF/Aug-CC-pVDZ) (Hartree): -265.30448275  
944 E(CCSD(T)/Aug-CC-pVQZ) (Hartree): -266.41562932  
945 E(CCSD/Aug-CC-pVQZ) (Hartree): -266.37547225  
946 T1 diagnostic: 0.022338  
947 E(MP2/Aug-CC-pVQZ) (Hartree): -266.35760149  
948 E(MP3/Aug-CC-pVQZ) (Hartree): -266.36587898  
949 E(PMP2/Aug-CC-pVQZ) (Hartree): -266.36512359  
950 E(PMP3/Aug-CC-pVQZ) (Hartree): -266.36993424  
951 E(PUHF/Aug-CC-pVQZ) (Hartree): -265.39819231  
952 E(UHF/Aug-CC-pVQZ) (Hartree): -265.38705796  
953 E(CCSD(T)/Aug-CC-pVTZ) (Hartree): -266.34601989  
954 E(CCSD/Aug-CC-pVTZ) (Hartree): -266.30868912  
955 T1 diagnostic: 0.022671  
956 E(MP2/Aug-CC-pVTZ) (Hartree): -266.28221139  
957 E(MP3/Aug-CC-pVTZ) (Hartree): -266.29716309  
958 E(PMP2/Aug-CC-pVTZ) (Hartree): -266.28969839  
959 E(PMP3/Aug-CC-pVTZ) (Hartree): -266.30121844  
960 E(PUHF/Aug-CC-pVTZ) (Hartree): -265.38106529  
961 E(UHF/Aug-CC-pVTZ) (Hartree): -265.36997634  
962 Electronic state : 2-A  
963 Cartesian coordinates (Angs):  
964 C -0.865685 0.371877 0.376505  
965 O -1.092578 -0.923213 -0.106821  
966 O 0.102956 1.046445 -0.338919  
967 H -1.761538 0.998358 0.293857  
968 H -0.595428 0.257332 1.425902  
969 H -1.386562 -0.864567 -1.020279  
970 H 1.100991 0.553545 -0.163528  
971 O 1.813653 -0.377079 0.104029  
972 H 1.244397 -1.145152 -0.061296  
973 Rotational constants (GHz): 11.0835300 5.2576421 3.9590010  
974  
975 TS.CH2OHOH+OH.CH2OHO+H2O.mtl  
976 -----  
977 E(UM062X/Aug-CC-pVQZ) (Hartree): -266.69890636  
978 Electronic state : 2-A  
979 Cartesian coordinates (Angs):  
980 C 0.908784 0.373151 0.333775  
981 O 1.245819 -0.856885 -0.215257  
982 O -0.139665 1.004991 -0.339745  
983 H 0.668474 0.281294 1.396018  
984 H 1.770538 1.029746 0.206439  
985 H 0.526075 -1.466877 -0.026560  
986 H -1.073547 0.643531 0.052711  
987 O -1.775756 -0.409839 0.191915  
988 H -1.987430 -0.632733 -0.726564  
989 Rotational constants (GHz): 11.6702000 4.9759300 3.8567600  
990 Vibrational harmonic frequencies (cm-1):  
991 i1430.3965 99.6042 200.9021



*Ubiquitous atmospheric production of organic acids: Supplementary Information*

992 261.2021 394.4103 452.0133  
993 577.6480 789.4049 1011.3768  
994 1076.0091 1129.8657 1230.3148  
995 1333.4910 1393.3723 1431.1310  
996 1496.1699 1677.6729 3046.0926  
997 3105.3107 3805.2228 3848.3659  
998 Zero-point correction (Hartree): 0.064608  
999  
1000 TS.CH2OHOH+OH.CH2OHO+H2O.mtt  
1001 -----  
1002 E(UM062X/Aug-CC-pVQZ) (Hartree): -266.69847498  
1003 Electronic state : 2-A  
1004 Cartesian coordinates (Angs):  
1005 C -0.846117 0.385855 0.410057  
1006 O -1.440334 -0.769679 -0.085540  
1007 O 0.191147 0.857120 -0.382297  
1008 H -1.553061 1.221872 0.463035  
1009 H -0.499041 0.145498 1.415070  
1010 H -1.782117 -0.591563 -0.965479  
1011 H 0.959711 0.100717 -0.465835  
1012 O 1.931254 -0.511606 0.055910  
1013 H 2.494677 0.201672 0.388282  
1014 Rotational constants (GHz): 13.5998600 4.1066400 3.5022200  
1015 Vibrational harmonic frequencies (cm-1):  
1016 i1531.9022 95.1209 186.5934  
1017 232.8401 360.0958 424.0857  
1018 557.7707 791.4692 1016.0227  
1019 1064.1115 1123.4835 1224.5437  
1020 1278.9601 1371.8379 1426.7091  
1021 1487.5440 1540.2929 3021.2148  
1022 3102.4725 3815.1333 3870.6255  
1023 Zero-point correction (Hartree): 0.063768  
1024  
1025 TS.CH2OHOH+OH.CH2OHO+H2O.tmm  
1026 -----  
1027 E(UM062X/Aug-CC-pVQZ) (Hartree): -266.69902832  
1028 Electronic state : 2-A  
1029 Cartesian coordinates (Angs):  
1030 C -0.911803 0.366619 0.350722  
1031 O -1.216488 -0.863111 -0.211664  
1032 O 0.122531 1.035242 -0.311621  
1033 H -1.787259 1.007815 0.242205  
1034 H -0.664521 0.270235 1.412034  
1035 H -0.504366 -1.476047 -0.003842  
1036 H 0.890339 0.349379 -0.525426  
1037 O 1.752114 -0.477717 0.041468  
1038 H 2.271369 0.093596 0.625230  
1039 Rotational constants (GHz): 11.4334100 5.0855000 3.8678000  
1040 Vibrational harmonic frequencies (cm-1):  
1041 i1174.9240 101.1873 199.3771  
1042 257.0928 383.6836 463.6255  
1043 547.9640 792.7513 1017.4087  
1044 1072.9590 1131.2853 1198.9460  
1045 1311.8405 1393.7621 1423.0361  
1046 1501.7890 1866.7083 3035.1392  
1047 3103.7532 3813.1502 3848.1197  
1048 Zero-point correction (Hartree): 0.064845  
1049  
1050 TS.CH2OHOH+OH.CH2OHO+H2O.tpl  
1051 -----  
1052 E(UM062X/Aug-CC-pVQZ) (Hartree): -266.69654559  
1053 Electronic state : 2-A  
1054 Cartesian coordinates (Angs):  
1055 C 0.878676 0.392486 0.334482  
1056 O 1.047118 -0.872754 -0.269606  
1057 O -0.123161 1.066066 -0.308441  
1058 H 0.670748 0.274909 1.402955  
1059 H 1.773587 1.011421 0.199644  
1060 H 1.628260 -1.410961 0.272655  
1061 H -1.086307 0.578483 -0.123965  
1062 O -1.796234 -0.403133 0.138958

*Ubiquitous atmospheric production of organic acids: Supplementary Information*

1063 H -1.280127 -1.130197 -0.245468  
1064 Rotational constants (GHz): 10.9978100 5.3637700 3.9684200  
1065 Vibrational harmonic frequencies (cm-1):  
1066 i1630.6325 130.2850 196.7989  
1067 216.2269 334.2607 454.8506  
1068 574.7802 753.7831 908.3560  
1069 1049.0699 1115.4558 1121.6422  
1070 1263.0257 1280.5983 1450.4309  
1071 1501.9019 1567.1896 3009.1271  
1072 3049.5235 3769.5528 3887.2591  
1073 Zero-point correction (Hartree): 0.062955  
1074  
1075 CH2OHO.m  
1076 -----  
1077 E(UM062X/Aug-CC-pVQZ) (Hartree): -190.29002724  
1078 Electronic state : 2-A  
1079 Cartesian coordinates (Angs):  
1080 C -0.100200 0.456323 0.043302  
1081 O 1.145823 -0.157084 -0.084546  
1082 O -1.169825 -0.342063 -0.040931  
1083 H -0.204299 0.971764 1.019954  
1084 H -0.152218 1.239940 -0.724777  
1085 H 1.149740 -0.956472 0.448821  
1086 Rotational constants (GHz): 50.4068200 10.8995100 9.6133000  
1087 Vibrational harmonic frequencies (cm-1):  
1088 246.8100 559.3098 770.6132  
1089 1017.2974 1131.6947 1161.4961  
1090 1309.6934 1361.3332 1417.0854  
1091 2880.1884 3003.7630 3870.4433  
1092 Zero-point correction (Hartree): 0.042669  
1093  
1094 CH2OHO.p  
1095 -----  
1096 E(CCSD(T)/Aug-CC-pVDZ) (Hartree): -189.86572575  
1097 E(CCSD/Aug-CC-pVDZ) (Hartree): -189.85004544  
1098 T1 diagnostic: 0.022233  
1099 E(MP2/Aug-CC-pVDZ) (Hartree): -189.81856929  
1100 E(MP3/Aug-CC-pVDZ) (Hartree): -189.84013517  
1101 E(PMP2/Aug-CC-pVDZ) (Hartree): -189.82096199  
1102 E(PMP3/Aug-CC-pVDZ) (Hartree): -189.84164872  
1103 E(PUHF/Aug-CC-pVDZ) (Hartree): -189.32331283  
1104 E(UHF/Aug-CC-pVDZ) (Hartree): -189.31946959  
1105 E(CCSD(T)/Aug-CC-pVTZ) (Hartree): -190.02897549  
1106 E(CCSD/Aug-CC-pVTZ) (Hartree): -190.00523066  
1107 T1 diagnostic: 0.021193  
1108 E(MP2/Aug-CC-pVTZ) (Hartree): -189.98055487  
1109 E(MP3/Aug-CC-pVTZ) (Hartree): -189.99838076  
1110 E(PMP2/Aug-CC-pVTZ) (Hartree): -189.98314160  
1111 E(PMP3/Aug-CC-pVTZ) (Hartree): -189.99997161  
1112 E(PUHF/Aug-CC-pVTZ) (Hartree): -189.37029990  
1113 E(UHF/Aug-CC-pVTZ) (Hartree): -189.36610683  
1114 E(CCSD(T)/Aug-CC-pVQZ) (Hartree): -190.07819593  
1115 E(CCSD/Aug-CC-pVQZ) (Hartree): -190.05251579  
1116 T1 diagnostic: 0.021052  
1117 E(MP2/Aug-CC-pVQZ) (Hartree): -190.03372800  
1118 E(MP3/Aug-CC-pVQZ) (Hartree): -190.04696501  
1119 E(PMP2/Aug-CC-pVQZ) (Hartree): -190.03633704  
1120 E(PMP3/Aug-CC-pVQZ) (Hartree): -190.04855754  
1121 E(PUHF/Aug-CC-pVQZ) (Hartree): -189.38251354  
1122 E(UHF/Aug-CC-pVQZ) (Hartree): -189.37828550  
1123 E(UM062X/Aug-CC-pVQZ) (Hartree): -190.29002724  
1124 Electronic state : 2-A  
1125 Cartesian coordinates (Angs):  
1126 C 0.100200 0.456323 0.043302  
1127 O -1.145823 -0.157084 -0.084546  
1128 O 1.169825 -0.342063 -0.040931  
1129 H 0.152218 1.239940 -0.724777  
1130 H 0.204299 0.971764 1.019954  
1131 H -1.149740 -0.956472 0.448821  
1132 Rotational constants (GHz): 50.4068200 10.8995100 9.6133000  
1133 Vibrational harmonic frequencies (cm-1):

*Ubiquitous atmospheric production of organic acids: Supplementary Information*

1134 246.8099 559.3098 770.6138  
1135 1017.2974 1131.6943 1161.4959  
1136 1309.6934 1361.3333 1417.0855  
1137 2880.1884 3003.7630 3870.4433  
1138 Zero-point correction (Hartree): 0.042669  
1139  
1140 CH2OHO.t  
1141 -----  
1142 E(UM062X/Aug-CC-pVQZ) (Hartree): -190.28590917  
1143 Electronic state : 2-A  
1144 Cartesian coordinates (Angs):  
1145 C -0.097560 0.439027 0.001443  
1146 O 1.075750 -0.328025 0.002425  
1147 O -1.195473 -0.307727 -0.002055  
1148 H -0.151064 1.096812 0.889742  
1149 H -0.145929 1.103107 -0.882098  
1150 H 1.840140 0.251936 -0.019260  
1151 Rotational constants (GHz): 53.1578300 10.8743400 9.5685800  
1152 Vibrational harmonic frequencies (cm-1):  
1153 120.1001 553.6882 743.4039  
1154 1018.6925 1154.8139 1178.3889  
1155 1232.1007 1365.7841 1419.5224  
1156 2897.8592 2916.5585 3889.0608  
1157 Zero-point correction (Hartree): 0.042123  
1158  
1159 TS.CHOHOH.CH2OHO.c  
1160 -----  
1161 E(CCSD(T)/Aug-CC-pVDZ) (Hartree): -189.81951234  
1162 E(CCSD/Aug-CC-pVDZ) (Hartree): -189.80067273  
1163 T1 diagnostic: 0.021583  
1164 E(MP2/Aug-CC-pVDZ) (Hartree): -189.77894598  
1165 E(MP3/Aug-CC-pVDZ) (Hartree): -189.78986113  
1166 E(PMP2/Aug-CC-pVDZ) (Hartree): -189.78415852  
1167 E(PMP3/Aug-CC-pVDZ) (Hartree): -189.79288938  
1168 E(PUHF/Aug-CC-pVDZ) (Hartree): -189.25150206  
1169 E(UHF/Aug-CC-pVDZ) (Hartree): -189.24421314  
1170 E(CCSD(T)/Aug-CC-pVTZ) (Hartree): -189.98504689  
1171 E(CCSD/Aug-CC-pVTZ) (Hartree): -189.95730519  
1172 T1 diagnostic: 0.020530  
1173 E(MP2/Aug-CC-pVTZ) (Hartree): -189.94312742  
1174 E(MP3/Aug-CC-pVTZ) (Hartree): -189.94945756  
1175 E(PMP2/Aug-CC-pVTZ) (Hartree): -189.94859183  
1176 E(PMP3/Aug-CC-pVTZ) (Hartree): -189.95259451  
1177 E(PUHF/Aug-CC-pVTZ) (Hartree): -189.29919797  
1178 E(UHF/Aug-CC-pVTZ) (Hartree): -189.29156401  
1179 E(CCSD(T)/Aug-CC-pVQZ) (Hartree): -190.03474369  
1180 E(CCSD/Aug-CC-pVQZ) (Hartree): -190.00492402  
1181 T1 diagnostic: 0.020255  
1182 E(MP2/Aug-CC-pVQZ) (Hartree): -189.99679291  
1183 E(MP3/Aug-CC-pVQZ) (Hartree): -189.99843644  
1184 E(PMP2/Aug-CC-pVQZ) (Hartree): -190.00229790  
1185 E(PMP3/Aug-CC-pVQZ) (Hartree): -190.00157749  
1186 E(PUHF/Aug-CC-pVQZ) (Hartree): -189.31140572  
1187 E(UHF/Aug-CC-pVQZ) (Hartree): -189.30371975  
1188 E(UM062X/Aug-CC-pVQZ) (Hartree): -190.24752704  
1189 Electronic state : 2-A  
1190 Cartesian coordinates (Angs):  
1191 C 0.040442 0.463513 0.047766  
1192 O -1.168132 -0.131321 -0.021354  
1193 O 1.148722 -0.299785 -0.104334  
1194 H 0.024494 1.471550 -0.358726  
1195 H 0.933668 0.272262 0.950834  
1196 H -1.045536 -1.076037 0.126795  
1197 Rotational constants (GHz): 56.8131500 10.9343600 9.5948300  
1198 Vibrational harmonic frequencies (cm-1):  
1199 i1809.5382 426.5446 559.1535  
1200 755.8059 1021.5551 1106.4456  
1201 1250.3819 1295.5851 1421.0881  
1202 2324.7321 3137.3267 3833.9480  
1203 Zero-point correction (Hartree): 0.039031  
1204

*Ubiquitous atmospheric production of organic acids: Supplementary Information*

1205 TS.CHOHOH.CH2OHO.t  
-----  
1206  
1207 E(UM062X/Aug-CC-pVQZ) (Hartree): -190.24249978  
1208 Electronic state : 2-A  
1209 Cartesian coordinates (Angs):  
1210 C 0.042567 0.427317 0.037957  
1211 O -1.098862 -0.304945 0.003654  
1212 O 1.185925 -0.266504 -0.096779  
1213 H -0.017674 1.422872 -0.405981  
1214 H 0.926511 0.305636 0.951241  
1215 H -1.860740 0.279178 -0.027998  
1216 Rotational constants (GHz): 61.9109700 10.6628000 9.5098100  
1217 Vibrational harmonic frequencies (cm-1):  
1218 i1835.4493 342.4600 560.6462  
1219 726.5211 1015.5678 1102.2900  
1220 1235.9497 1296.2257 1428.4024  
1221 2360.8849 3071.4056 3881.6283  
1222 Zero-point correction (Hartree): 0.038779  
1223  
1224 TS.CH2OHOH+OH.CHOHOHOH+H  
-----  
1226 E(CCSD(T)/Aug-CC-pVDZ) (Hartree): -266.04711026  
1227 E(CCSD/Aug-CC-pVDZ) (Hartree): -266.01950760  
1228 T1 diagnostic: 0.023688  
1229 E(MP2/Aug-CC-pVDZ) (Hartree): -265.98988117  
1230 E(MP3/Aug-CC-pVDZ) (Hartree): -266.00327195  
1231 E(PMP2/Aug-CC-pVDZ) (Hartree): -266.00020309  
1232 E(PMP3/Aug-CC-pVDZ) (Hartree): -266.00999323  
1233 E(PUHF/Aug-CC-pVDZ) (Hartree): -265.23283689  
1234 E(UHF/Aug-CC-pVDZ) (Hartree): -265.21942698  
1235 E(CCSD(T)/Aug-CC-pVTZ) (Hartree): -266.27897954  
1236 E(CCSD/Aug-CC-pVTZ) (Hartree): -266.23872206  
1237 T1 diagnostic: 0.022752  
1238 E(MP2/Aug-CC-pVTZ) (Hartree): -266.22007206  
1239 E(MP3/Aug-CC-pVTZ) (Hartree): -266.22668029  
1240 E(PMP2/Aug-CC-pVTZ) (Hartree): -266.23065869  
1241 E(PMP3/Aug-CC-pVTZ) (Hartree): -266.23355038  
1242 E(PUHF/Aug-CC-pVTZ) (Hartree): -265.29651972  
1243 E(UHF/Aug-CC-pVTZ) (Hartree): -265.28278275  
1244 E(CCSD(T)/Aug-CC-pVQZ) (Hartree): -266.34958860  
1245 E(CCSD/Aug-CC-pVQZ) (Hartree): -266.30639707  
1246 T1 diagnostic: 0.022571  
1247 E(MP2/Aug-CC-pVQZ) (Hartree): -266.29628649  
1248 E(MP3/Aug-CC-pVQZ) (Hartree): -266.29627937  
1249 E(PMP2/Aug-CC-pVQZ) (Hartree): -266.30693774  
1250 E(PMP3/Aug-CC-pVQZ) (Hartree): -266.30317410  
1251 E(PUHF/Aug-CC-pVQZ) (Hartree): -265.31380465  
1252 E(UHF/Aug-CC-pVQZ) (Hartree): -265.29999023  
1253 E(UM062X/Aug-CC-pVQZ) (Hartree): -266.63361271  
1254 Electronic state : 2-A  
1255 Cartesian coordinates (Angs):  
1256 C 0.215522 0.087678 0.406184  
1257 O 0.894117 -0.939183 -0.241372  
1258 O 0.177027 1.321613 -0.188426  
1259 H -0.206572 -0.085242 1.421911  
1260 H 1.210978 0.450934 1.221107  
1261 H 1.797814 -0.659790 -0.407758  
1262 H -0.562024 1.280762 -0.811261  
1263 O -1.354302 -0.401997 -0.035075  
1264 H -1.268067 -1.356200 -0.142125  
1265 Rotational constants (GHz): 8.9295400 8.7327900 5.1154900  
1266 Vibrational harmonic frequencies (cm-1):  
1267 i1557.9218 165.6724 325.1477  
1268 398.3603 426.3695 492.6434  
1269 586.5002 671.1235 937.8656  
1270 989.6752 1020.5336 1113.0994  
1271 1138.9312 1267.1585 1322.7269  
1272 1362.4710 1454.3841 2810.3547  
1273 3769.9528 3847.7420 3875.2726  
1274 Zero-point correction (Hartree): 0.063734  
1275

*Ubiquitous atmospheric production of organic acids: Supplementary Information*

1276 CHOHOHOO.ccm  
-----  
1277  
1278 E(UM062X/Aug-CC-pVQZ) (Hartree): -340.70414905  
1279 Electronic state : 2-A  
1280 Cartesian coordinates (Angs):  
1281 C -0.554507 0.000001 0.429014  
1282 O -0.891800 1.154112 -0.212124  
1283 O -0.892578 -1.153592 -0.212655  
1284 H -0.986696 -0.000114 1.422346  
1285 H -0.386844 1.216248 -1.032061  
1286 H -0.388219 -1.215351 -1.032982  
1287 O 0.905019 -0.000530 0.660666  
1288 O 1.515460 -0.000088 -0.477310  
1289 Rotational constants (GHz): 7.8935500 5.1206700 4.0170200  
1290 Vibrational harmonic frequencies (cm-1):  
1291 81.5371 260.3337 338.5196  
1292 452.2729 503.7889 567.7031  
1293 773.4271 815.7345 1093.1856  
1294 1182.1884 1220.4018 1257.1352  
1295 1380.9290 1439.3420 1446.6224  
1296 3202.2520 3815.2983 3820.2145  
1297 Zero-point correction (Hartree): 0.053881  
1298  
1299 CHOHOHOO.hlh  
-----  
1300  
1301 E(UM062X/Aug-CC-pVQZ) (Hartree): -340.70073512  
1302 Electronic state : 2-A  
1303 Cartesian coordinates (Angs):  
1304 C 0.443083 0.043881 0.320916  
1305 O 1.566365 -0.557511 -0.139096  
1306 O 0.419634 1.312547 -0.151450  
1307 H 0.306281 -0.023539 1.404685  
1308 H 1.706205 -1.388502 0.321251  
1309 H -0.446315 1.685230 0.051453  
1310 O -0.706289 -0.714686 -0.232545  
1311 O -1.807794 -0.107409 0.060230  
1312 Rotational constants (GHz): 10.0198300 4.4760400 3.2904400  
1313 Vibrational harmonic frequencies (cm-1):  
1314 93.9092 239.5912 337.4647  
1315 407.3638 464.8906 598.7642  
1316 645.1490 906.3863 1093.0352  
1317 1171.7442 1279.1363 1304.6467  
1318 1356.0744 1390.8201 1506.8601  
1319 3054.9520 3833.7657 3890.8096  
1320 Zero-point correction (Hartree): 0.053709  
1321  
1322 CHOHOHOO.hlm  
-----  
1323  
1324 E(UM062X/Aug-CC-pVQZ) (Hartree): -340.69536550  
1325 Electronic state : 2-A  
1326 Cartesian coordinates (Angs):  
1327 C -0.527892 0.000098 0.401105  
1328 O -0.915310 1.089662 -0.313802  
1329 O -0.916129 -1.088910 -0.314161  
1330 H -0.884602 0.000024 1.435745  
1331 H -0.670230 1.889121 0.158876  
1332 H -0.674474 -1.888702 0.159700  
1333 O 0.926750 -0.000399 0.614567  
1334 O 1.579271 -0.000481 -0.506722  
1335 Rotational constants (GHz): 8.0940700 4.9180400 3.8690700  
1336 Vibrational harmonic frequencies (cm-1):  
1337 116.0738 197.9604 313.5372  
1338 354.4201 466.6924 543.0429  
1339 793.9028 871.9354 1102.3379  
1340 1143.6773 1229.9818 1271.4241  
1341 1355.2366 1421.9515 1481.0464  
1342 3057.2425 3886.0023 3887.2432  
1343 Zero-point correction (Hartree): 0.053523  
1344  
1345 CHOHOHOO.llm  
-----  
1346

*Ubiquitous atmospheric production of organic acids: Supplementary Information*

1347 E(UM062X/Aug-CC-pVQZ) (Hartree): -340.70332791  
1348 Electronic state : 2-A  
1349 Cartesian coordinates (Angs):  
1350 C -0.535267 0.015076 0.429159  
1351 O -0.717404 1.253167 -0.065525  
1352 O -1.071131 -0.923517 -0.420644  
1353 H -0.912330 -0.036326 1.448555  
1354 H -0.328680 1.274025 -0.950135  
1355 H -0.873210 -1.808731 -0.101272  
1356 O 0.901016 -0.284205 0.595301  
1357 O 1.553246 0.014627 -0.480644  
1358 Rotational constants (GHz): 8.0932100 5.0159200 3.9390000  
1359 Vibrational harmonic frequencies (cm-1):  
1360 131.9730 281.0084 323.2799  
1361 410.2748 485.7788 565.2131  
1362 784.0457 827.1604 1092.6636  
1363 1189.6071 1232.0977 1257.8668  
1364 1386.0428 1412.8754 1469.8193  
1365 3139.3094 3803.5323 3867.4352  
1366 Zero-point correction (Hartree): 0.053901  
1367  
1368 CHOHOHOO.lpt  
1369 -----  
1370 E(UM062X/Aug-CC-pVQZ) (Hartree): -340.70222874  
1371 Electronic state : 2-A  
1372 Cartesian coordinates (Angs):  
1373 C 0.388615 0.027310 0.330318  
1374 O 1.406798 -0.815730 -0.035950  
1375 O 0.680664 1.296333 -0.032837  
1376 H 0.121686 0.012637 1.385270  
1377 H 1.158600 -1.728030 0.139459  
1378 H 1.059979 1.282711 -0.919390  
1379 O -0.793432 -0.462959 -0.388146  
1380 O -1.878025 0.015959 0.133528  
1381 Rotational constants (GHz): 9.6332800 4.3345500 3.2505300  
1382 Vibrational harmonic frequencies (cm-1):  
1383 97.1360 276.3166 346.7326  
1384 360.6855 488.9426 570.8020  
1385 638.9776 938.9475 1093.6399  
1386 1187.9024 1242.5361 1292.1778  
1387 1363.9274 1397.1449 1469.5910  
1388 3137.2664 3829.1913 3870.0898  
1389 Zero-point correction (Hartree): 0.053769  
1390  
1391 CHOHOHOO.mlt  
1392 -----  
1393 E(CCSD(T)/Aug-CC-pVDZ) (Hartree): -339.96217171  
1394 E(CCSD/Aug-CC-pVDZ) (Hartree): -339.93089033  
1395 T1 diagnostic: 0.024772  
1396 E(MP2/Aug-CC-pVDZ) (Hartree): -339.89975105  
1397 E(MP3/Aug-CC-pVDZ) (Hartree): -339.91263126  
1398 E(PMP2/Aug-CC-pVDZ) (Hartree): -339.90274823  
1399 E(PMP3/Aug-CC-pVDZ) (Hartree): -339.91441029  
1400 E(PUHF/Aug-CC-pVDZ) (Hartree): -339.00330077  
1401 E(UHF/Aug-CC-pVDZ) (Hartree): -338.99841396  
1402 E(CCSD(T)/Aug-CC-pVTZ) (Hartree): -340.25115060  
1403 E(CCSD/Aug-CC-pVTZ) (Hartree): -340.20455706  
1404 T1 diagnostic: 0.023620  
1405 E(MP2/Aug-CC-pVTZ) (Hartree): -340.18538150  
1406 E(MP3/Aug-CC-pVTZ) (Hartree): -340.19127061  
1407 E(PMP2/Aug-CC-pVTZ) (Hartree): -340.18859881  
1408 E(PMP3/Aug-CC-pVTZ) (Hartree): -340.19313505  
1409 E(PUHF/Aug-CC-pVTZ) (Hartree): -339.08588013  
1410 E(UHF/Aug-CC-pVTZ) (Hartree): -339.08063373  
1411 E(CCSD(T)/Aug-CC-pVQZ) (Hartree): -340.33984568  
1412 E(CCSD/Aug-CC-pVQZ) (Hartree): -340.28961900  
1413 T1 diagnostic: 0.023265  
1414 E(MP2/Aug-CC-pVQZ) (Hartree): -340.28042285  
1415 E(MP3/Aug-CC-pVQZ) (Hartree): -340.27890577  
1416 E(PMP2/Aug-CC-pVQZ) (Hartree): -340.28367396  
1417 E(PMP3/Aug-CC-pVQZ) (Hartree): -340.28077134

*Ubiquitous atmospheric production of organic acids: Supplementary Information*

1418 E(PUHF/Aug-CC-pVQZ) (Hartree): -339.10797868  
1419 E(UHF/Aug-CC-pVQZ) (Hartree): -339.10268508  
1420 E(UM062X/Aug-CC-pVQZ) (Hartree): -340.70570700  
1421 Electronic state : 2-A  
1422 Cartesian coordinates (Angs):  
1423 C 0.448882 0.018563 0.363884  
1424 O 1.561231 -0.636723 -0.023875  
1425 O 0.410221 1.284076 -0.144075  
1426 H 0.347404 -0.034181 1.447394  
1427 H 1.744389 -0.410024 -0.943091  
1428 H -0.481256 1.630721 -0.010914  
1429 O -0.709938 -0.740482 -0.168747  
1430 O -1.799493 -0.069108 0.002111  
1431 Rotational constants (GHz): 10.1307900 4.4817500 3.3270800  
1432 Vibrational harmonic frequencies (cm-1):  
1433 103.4401 311.1217 368.9512  
1434 434.2546 493.9248 595.7198  
1435 644.5591 890.4662 1079.8044  
1436 1217.0695 1250.2630 1302.3845  
1437 1360.5967 1407.7005 1482.6775  
1438 3120.1913 3808.6968 3831.1147  
1439 Zero-point correction (Hartree): 0.053999  
1440  
1441 CHOHOHOO.mpp  
1442 -----  
1443 E(CCSD(T)/Aug-CC-pVDZ) (Hartree): -339.96219244  
1444 E(CCSD/Aug-CC-pVDZ) (Hartree): -339.93090026  
1445 T1 diagnostic: 0.024780  
1446 E(MP2/Aug-CC-pVDZ) (Hartree): -339.89976674  
1447 E(MP3/Aug-CC-pVDZ) (Hartree): -339.91263457  
1448 E(PMP2/Aug-CC-pVDZ) (Hartree): -339.90276520  
1449 E(PMP3/Aug-CC-pVDZ) (Hartree): -339.91441437  
1450 E(PUHF/Aug-CC-pVDZ) (Hartree): -339.00326224  
1451 E(UHF/Aug-CC-pVDZ) (Hartree): -338.99837394  
1452 E(CCSD(T)/Aug-CC-pVTZ) (Hartree): -340.25116399  
1453 E(CCSD/Aug-CC-pVTZ) (Hartree): -340.20455821  
1454 T1 diagnostic: 0.023627  
1455 E(MP2/Aug-CC-pVTZ) (Hartree): -340.18539069  
1456 E(MP3/Aug-CC-pVTZ) (Hartree): -340.19126565  
1457 E(PMP2/Aug-CC-pVTZ) (Hartree): -340.18860930  
1458 E(PMP3/Aug-CC-pVTZ) (Hartree): -340.19313088  
1459 E(PUHF/Aug-CC-pVTZ) (Hartree): -339.08583676  
1460 E(UHF/Aug-CC-pVTZ) (Hartree): -339.08058886  
1461 E(CCSD(T)/Aug-CC-pVQZ) (Hartree): -340.33985580  
1462 E(CCSD/Aug-CC-pVQZ) (Hartree): -340.28961665  
1463 T1 diagnostic: 0.023273  
1464 E(MP2/Aug-CC-pVQZ) (Hartree): -340.28042929  
1465 E(MP3/Aug-CC-pVQZ) (Hartree): -340.27889760  
1466 E(PMP2/Aug-CC-pVQZ) (Hartree): -340.28368171  
1467 E(PMP3/Aug-CC-pVQZ) (Hartree): -340.28076396  
1468 E(PUHF/Aug-CC-pVQZ) (Hartree): -339.10793390  
1469 E(UHF/Aug-CC-pVQZ) (Hartree): -339.10263879  
1470 E(UM062X/Aug-CC-pVQZ) (Hartree): -340.70570734  
1471 Electronic state : 2-A  
1472 Cartesian coordinates (Angs):  
1473 C -0.449594 0.018894 0.364308  
1474 O -0.408746 1.284398 -0.143598  
1475 O -1.561894 -0.635542 -0.025062  
1476 H -0.350197 -0.034023 1.448082  
1477 H 0.484375 1.628065 -0.012818  
1478 H -1.741346 -0.411364 -0.945742  
1479 O 0.709521 -0.741514 -0.166607  
1480 O 1.799211 -0.069347 0.000846  
1481 Rotational constants (GHz): 10.1298300 4.4822100 3.3271400  
1482 Vibrational harmonic frequencies (cm-1):  
1483 104.6869 312.8660 370.8655  
1484 437.1547 494.6044 595.9433  
1485 645.0314 889.2438 1080.0615  
1486 1218.2116 1250.4535 1301.9222  
1487 1360.3999 1407.9329 1482.8541  
1488 3119.5005 3806.9217 3829.6572

*Ubiquitous atmospheric production of organic acids: Supplementary Information*

1489 Zero-point correction (Hartree): 0.054012  
1490  
1491 CHOHOHOO.pph  
1492 -----  
1493 E(UM062X/Aug-CC-pVQZ) (Hartree): -340.69997383  
1494 Electronic state : 2-A  
1495 Cartesian coordinates (Angs):  
1496 C 0.376467 0.006914 0.325553  
1497 O 1.356256 -0.876133 -0.069258  
1498 O 0.619277 1.299293 -0.045964  
1499 H 0.161199 0.003223 1.391970  
1500 H 2.194474 -0.586260 0.299981  
1501 H 0.786960 1.318584 -0.995723  
1502 O -0.784126 -0.515893 -0.355709  
1503 O -1.866587 -0.004395 0.139737  
1504 Rotational constants (GHz): 9.6476000 4.3983800 3.2841200  
1505 Vibrational harmonic frequencies (cm-1):  
1506 101.2126 231.4980 345.8540  
1507 399.5951 504.1487 580.2895  
1508 647.3805 946.6576 1098.4120  
1509 1192.4014 1267.4353 1295.9603  
1510 1317.1672 1403.9463 1448.0430  
1511 3140.4875 3823.5801 3884.7253  
1512 Zero-point correction (Hartree): 0.053830  
1513  
1514 TS.CHOHOHOO.HCOOH+HO2.c  
1515 -----  
1516 E(CCSD(T)/Aug-CC-pVDZ) (Hartree): -339.94746491  
1517 E(CCSD/Aug-CC-pVDZ) (Hartree): -339.91077072  
1518 T1 diagnostic: 0.021872  
1519 E(MP2/Aug-CC-pVDZ) (Hartree): -339.89484191  
1520 E(MP3/Aug-CC-pVDZ) (Hartree): -339.89364179  
1521 E(PMP2/Aug-CC-pVDZ) (Hartree): -339.89978007  
1522 E(PMP3/Aug-CC-pVDZ) (Hartree): -339.89631656  
1523 E(PUHF/Aug-CC-pVDZ) (Hartree): -338.96378953  
1524 E(UHF/Aug-CC-pVDZ) (Hartree): -338.95629524  
1525 E(CCSD(T)/Aug-CC-pVTZ) (Hartree): -340.23687053  
1526 E(CCSD/Aug-CC-pVTZ) (Hartree): -340.18422956  
1527 T1 diagnostic: 0.020662  
1528 E(MP2/Aug-CC-pVTZ) (Hartree): -340.18115787  
1529 E(MP3/Aug-CC-pVTZ) (Hartree): -340.17205264  
1530 E(PMP2/Aug-CC-pVTZ) (Hartree): -340.18638718  
1531 E(PMP3/Aug-CC-pVTZ) (Hartree): -340.17480947  
1532 E(PUHF/Aug-CC-pVTZ) (Hartree): -339.04674697  
1533 E(UHF/Aug-CC-pVTZ) (Hartree): -339.03882511  
1534 E(CCSD(T)/Aug-CC-pVQZ) (Hartree): -340.32520740  
1535 E(CCSD/Aug-CC-pVQZ) (Hartree): -340.26885889  
1536 T1 diagnostic: 0.020211  
1537 E(MP2/Aug-CC-pVQZ) (Hartree): -340.27602725  
1538 E(MP3/Aug-CC-pVQZ) (Hartree): -340.25936075  
1539 E(PMP2/Aug-CC-pVQZ) (Hartree): -340.28131469  
1540 E(PMP3/Aug-CC-pVQZ) (Hartree): -340.26211920  
1541 E(PUHF/Aug-CC-pVQZ) (Hartree): -339.06861260  
1542 E(UHF/Aug-CC-pVQZ) (Hartree): -339.06061664  
1543 E(UM062X/Aug-CC-pVQZ) (Hartree): -340.69060898  
1544 Electronic state : 2-A  
1545 Cartesian coordinates (Angs):  
1546 C -0.699345 0.114722 0.432139  
1547 O -0.270200 1.229341 -0.002000  
1548 O 0.894111 -0.847531 0.201267  
1549 O 1.679536 0.038015 -0.264665  
1550 H 0.860787 0.951399 -0.240980  
1551 O -1.589797 -0.582610 -0.268872  
1552 H -1.597669 -0.242865 -1.172890  
1553 H -0.776246 -0.094579 1.495194  
1554 Rotational constants (GHz): 9.8927300 4.2772800 3.3354300  
1555 Vibrational harmonic frequencies (cm-1):  
1556 i933.7756 149.2304 308.2454  
1557 475.4034 597.5000 644.7516  
1558 713.5777 792.7260 1091.9987  
1559 1158.9682 1181.2203 1340.0787



*Ubiquitous atmospheric production of organic acids: Supplementary Information*

1560 1374.1807 1389.9305 1633.4853  
1561 1944.7937 3168.5668 3812.6327  
1562 Zero-point correction (Hartree): 0.049612  
1563  
1564 TS.CHOHOHOO.HCOOH+HO2.t  
1565 -----  
1566 E(UM062X/Aug-CC-pVQZ) (Hartree): -340.68573513  
1567 Electronic state : 2-A  
1568 Cartesian coordinates (Angs):  
1569 C -0.703584 0.166233 0.398026  
1570 O -0.223690 1.261037 -0.003992  
1571 O 0.867946 -0.857204 0.235086  
1572 O 1.673337 -0.014390 -0.268685  
1573 H 0.882936 0.930005 -0.272734  
1574 O -1.556140 -0.470735 -0.412592  
1575 H -1.923650 -1.245173 0.023290  
1576 H -0.829407 -0.031889 1.462749  
1577 Rotational constants (GHz): 9.6828500 4.3377100 3.3468000  
1578 Vibrational harmonic frequencies (cm-1):  
1579 i941.1577 139.1340 313.7652  
1580 435.5349 601.3521 620.2187  
1581 720.4793 772.0718 1063.5465  
1582 1149.7482 1172.1937 1286.0949  
1583 1394.0160 1396.9214 1670.1445  
1584 1943.0690 3111.8053 3868.3721  
1585 Zero-point correction (Hartree): 0.049342  
1586  
1587 TS.CHOHOH+O2.HCOOH+HO2  
1588 -----  
1589 E(CCSD(T)/Aug-CC-pVDZ) (Hartree): -339.89241587  
1590 E(CCSD/Aug-CC-pVDZ) (Hartree): -339.84838753  
1591 T1 diagnostic: 0.153230  
1592 E(MP2/Aug-CC-pVDZ) (Hartree): -339.80656936  
1593 E(MP3/Aug-CC-pVDZ) (Hartree): -339.80936636  
1594 E(PMP2/Aug-CC-pVDZ) (Hartree): -339.81175382  
1595 E(PMP3/Aug-CC-pVDZ) (Hartree): -339.81352802  
1596 E(PUHF/Aug-CC-pVDZ) (Hartree): -338.89312548  
1597 E(UHF/Aug-CC-pVDZ) (Hartree): -338.88594776  
1598 E(CCSD(T)/Aug-CC-pVTZ) (Hartree): -340.18313507  
1599 E(CCSD/Aug-CC-pVTZ) (Hartree): -340.11727859  
1600 T1 diagnostic: 0.146442  
1601 E(MP2/Aug-CC-pVTZ) (Hartree): -340.09023033  
1602 E(MP3/Aug-CC-pVTZ) (Hartree): -340.08523210  
1603 E(PMP2/Aug-CC-pVTZ) (Hartree): -340.09569997  
1604 E(PMP3/Aug-CC-pVTZ) (Hartree): -340.08941265  
1605 E(PUHF/Aug-CC-pVTZ) (Hartree): -338.97474234  
1606 E(UHF/Aug-CC-pVTZ) (Hartree): -338.96712251  
1607 E(CCSD(T)/Aug-CC-pVQZ) (Hartree): -340.27169943  
1608 E(CCSD/Aug-CC-pVQZ) (Hartree): -340.20114387  
1609 T1 diagnostic: 0.141445  
1610 E(MP2/Aug-CC-pVQZ) (Hartree): -340.18548568  
1611 E(MP3/Aug-CC-pVQZ) (Hartree): -340.17296407  
1612 E(PMP2/Aug-CC-pVQZ) (Hartree): -340.19101530  
1613 E(PMP3/Aug-CC-pVQZ) (Hartree): -340.17713439  
1614 E(PUHF/Aug-CC-pVQZ) (Hartree): -338.99710052  
1615 E(UHF/Aug-CC-pVQZ) (Hartree): -338.98940316  
1616 E(UM062X/Aug-CC-pVQZ) (Hartree): -340.63322771  
1617 Electronic state : 2-A  
1618 Cartesian coordinates (Angs):  
1619 C 1.623149 0.011300 -0.061386  
1620 O 0.940741 1.127492 0.191345  
1621 O 0.950171 -1.128810 -0.198729  
1622 H 2.641120 -0.012089 0.293253  
1623 H 0.113445 1.144738 -0.318722  
1624 H 0.094343 -1.095427 0.274639  
1625 O -1.703738 -0.386387 0.478652  
1626 O -1.760650 0.374577 -0.456373  
1627 Rotational constants (GHz): 8.9610900 2.9436300 2.3944000  
1628 Vibrational harmonic frequencies (cm-1):  
1629 i1007.4162 92.5421 110.5515  
1630 131.6076 220.0498 251.1557

*Ubiquitous atmospheric production of organic acids: Supplementary Information*

1631 499.6269 565.5849 611.0244  
1632 1027.8861 1202.7844 1295.2749  
1633 1351.4031 1447.3075 1560.5144  
1634 3224.5730 3383.8209 3613.2892  
1635 Zero-point correction (Hartree): 0.046905  
1636  
1637 IRC information available.  
1638 IRCMax information available :  
1639 E(CCSD(T)/Aug-CC-pVDZ) (Hartree): -339.89228249  
1640 E(CCSD/Aug-CC-pVDZ) (Hartree): -339.84990823  
1641 T1 diagnostic: 0.075571  
1642 E(MP2/Aug-CC-pVDZ) (Hartree): -339.82185092  
1643 E(MP3/Aug-CC-pVDZ) (Hartree): -339.82476581  
1644 E(PMP2/Aug-CC-pVDZ) (Hartree): -339.82677351  
1645 E(PMP3/Aug-CC-pVDZ) (Hartree): -339.82798800  
1646 E(PUHF/Aug-CC-pVDZ) (Hartree): -338.90844553  
1647 E(UHF/Aug-CC-pVDZ) (Hartree): -338.90129608  
1648 E(CCSD(T)/Aug-CC-pVQZ) (Hartree): -340.26533199  
1649 E(CCSD/Aug-CC-pVQZ) (Hartree): -340.20409429  
1650 T1 diagnostic: 0.063823  
1651 E(MP2/Aug-CC-pVQZ) (Hartree): -340.20069321  
1652 E(MP3/Aug-CC-pVQZ) (Hartree): -340.18830545  
1653 E(PMP2/Aug-CC-pVQZ) (Hartree): -340.20597982  
1654 E(PMP3/Aug-CC-pVQZ) (Hartree): -340.19157411  
1655 E(PUHF/Aug-CC-pVQZ) (Hartree): -339.01239419  
1656 E(UHF/Aug-CC-pVQZ) (Hartree): -339.00471008  
1657 E(CCSD(T)/Aug-CC-pVTZ) (Hartree): -340.17774739  
1658 E(CCSD/Aug-CC-pVTZ) (Hartree): -340.11966121  
1659 T1 diagnostic: 0.067532  
1660 E(MP2/Aug-CC-pVTZ) (Hartree): -340.10553803  
1661 E(MP3/Aug-CC-pVTZ) (Hartree): -340.10066507  
1662 E(PMP2/Aug-CC-pVTZ) (Hartree): -340.11076548  
1663 E(PMP3/Aug-CC-pVTZ) (Hartree): -340.10394344  
1664 E(PUHF/Aug-CC-pVTZ) (Hartree): -338.99010513  
1665 E(UHF/Aug-CC-pVTZ) (Hartree): -338.98249795  
1666 Electronic state : 2-A  
1667 Cartesian coordinates (Angs):  
1668 C 1.612636 0.009479 -0.050767  
1669 O 0.944156 1.122595 0.190946  
1670 O 0.953138 -1.122562 -0.200539  
1671 H 2.648500 -0.009240 0.253006  
1672 H 0.086164 1.127205 -0.289601  
1673 H 0.065046 -1.079112 0.243550  
1674 O -1.699380 -0.393413 0.482014  
1675 O -1.757355 0.381413 -0.460216  
1676 Rotational constants (GHz): 9.0025261 2.9531894 2.4048309  
1677  
1678 TS.CHOHOH.HCOOH+H.hh  
1679 -----  
1680 E(UM062X/Aug-CC-pVQZ) (Hartree): -190.25204184  
1681 Electronic state : 2-A  
1682 Cartesian coordinates (Angs):  
1683 C -0.022355 0.422047 0.027466  
1684 O 1.089959 -0.320797 -0.039470  
1685 O -1.115368 -0.085494 -0.156306  
1686 H 0.111106 1.457409 0.348207  
1687 H 1.863132 0.205387 0.182395  
1688 H -1.636841 -0.944748 0.870808  
1689 Rotational constants (GHz): 62.0873200 10.8649400 9.6949400  
1690 Vibrational harmonic frequencies (cm-1):  
1691 i1530.8625 254.5449 471.3077  
1692 615.1636 704.6263 961.7231  
1693 1153.6834 1285.0155 1404.4464  
1694 1734.9568 3093.6728 3874.5672  
1695 Zero-point correction (Hartree): 0.035434  
1696  
1697 TS.CHOHOH.HCOOH+H.II  
1698 -----  
1699 E(UM062X/Aug-CC-pVQZ) (Hartree): -190.25204184  
1700 Electronic state : 2-A  
1701 Cartesian coordinates (Angs):

*Ubiquitous atmospheric production of organic acids: Supplementary Information*

1702 C 0.022355 0.422047 0.027466  
1703 O -1.089959 -0.320797 -0.039470  
1704 O 1.115368 -0.085494 -0.156306  
1705 H -0.111106 1.457410 0.348207  
1706 H -1.863132 0.205387 0.182395  
1707 H 1.636843 -0.944747 0.870808  
1708 Rotational constants (GHz): 62.0873300 10.8649400 9.6949400  
1709 Vibrational harmonic frequencies (cm-1):  
1710 i1530.8623 254.5447 471.3076  
1711 615.1636 704.6261 961.7230  
1712 1153.6834 1285.0155 1404.4464  
1713 1734.9567 3093.6728 3874.5672  
1714 Zero-point correction (Hartree): 0.035434  
1715  
1716 TS.CHOHOH.HCOOH+H.ph  
1717 -----  
1718 E(CCSD(T)/Aug-CC-pVDZ) (Hartree): -189.83107764  
1719 E(CCSD/Aug-CC-pVDZ) (Hartree): -189.81133971  
1720 T1 diagnostic: 0.025043  
1721 E(MP2/Aug-CC-pVDZ) (Hartree): -189.79196029  
1722 E(MP3/Aug-CC-pVDZ) (Hartree): -189.79836146  
1723 E(PMP2/Aug-CC-pVDZ) (Hartree): -189.79898930  
1724 E(PMP3/Aug-CC-pVDZ) (Hartree): -189.80316863  
1725 E(PUHF/Aug-CC-pVDZ) (Hartree): -189.26790112  
1726 E(UHF/Aug-CC-pVDZ) (Hartree): -189.25936189  
1727 E(CCSD(T)/Aug-CC-pVTZ) (Hartree): -189.99553317  
1728 E(CCSD/Aug-CC-pVTZ) (Hartree): -189.96683599  
1729 T1 diagnostic: 0.024355  
1730 E(MP2/Aug-CC-pVTZ) (Hartree): -189.95485298  
1731 E(MP3/Aug-CC-pVTZ) (Hartree): -189.95667792  
1732 E(PMP2/Aug-CC-pVTZ) (Hartree): -189.96197837  
1733 E(PMP3/Aug-CC-pVTZ) (Hartree): -189.96154332  
1734 E(PUHF/Aug-CC-pVTZ) (Hartree): -189.31575222  
1735 E(UHF/Aug-CC-pVTZ) (Hartree): -189.30710940  
1736 E(CCSD(T)/Aug-CC-pVQZ) (Hartree): -190.04575948  
1737 E(CCSD/Aug-CC-pVQZ) (Hartree): -190.01498243  
1738 T1 diagnostic: 0.024207  
1739 E(MP2/Aug-CC-pVQZ) (Hartree): -190.00885141  
1740 E(MP3/Aug-CC-pVQZ) (Hartree): -190.00617012  
1741 E(PMP2/Aug-CC-pVQZ) (Hartree): -190.01603191  
1742 E(PMP3/Aug-CC-pVQZ) (Hartree): -190.01105781  
1743 E(PUHF/Aug-CC-pVQZ) (Hartree): -189.32834138  
1744 E(UHF/Aug-CC-pVQZ) (Hartree): -189.31963614  
1745 E(UM062X/Aug-CC-pVQZ) (Hartree): -190.25805258  
1746 Electronic state : 2-A  
1747 Cartesian coordinates (Angs):  
1748 C -0.019730 0.464760 0.017745  
1749 O 1.156460 -0.159403 0.020205  
1750 O -1.084591 -0.121832 -0.156615  
1751 H 0.064812 1.510737 0.301392  
1752 H 1.008177 -1.087568 -0.204092  
1753 H -1.529563 -0.961847 0.887513  
1754 Rotational constants (GHz): 56.7711600 11.2548700 9.8494000  
1755 Vibrational harmonic frequencies (cm-1):  
1756 i1551.9148 224.4546 563.2240  
1757 612.0555 724.8637 982.0912  
1758 1166.5928 1329.3047 1385.5177  
1759 1697.9135 3161.5451 3806.9072  
1760 Zero-point correction (Hartree): 0.035664  
1761  
1762 TS.CHOHOH.HCOOH+H.pl  
1763 -----  
1764 E(UM062X/Aug-CC-pVQZ) (Hartree): -190.25805258  
1765 Electronic state : 2-A  
1766 Cartesian coordinates (Angs):  
1767 C 0.019731 0.464759 0.017743  
1768 O -1.156461 -0.159402 0.020207  
1769 O 1.084590 -0.121836 -0.156616  
1770 H -0.064809 1.510737 0.301387  
1771 H -1.008180 -1.087567 -0.204092  
1772 H 1.529575 -0.961819 0.887525

*Ubiquitous atmospheric production of organic acids: Supplementary Information*

1773 Rotational constants (GHz): 56.7713800 11.2548600 9.8494000  
1774 Vibrational harmonic frequencies (cm-1):  
1775 i1551.9383 224.4709 563.2262  
1776 612.0567 724.8686 982.0903  
1777 1166.5936 1329.3053 1385.5185  
1778 1697.9139 3161.5461 3806.9080  
1779 Zero-point correction (Hartree): 0.035664  
1780  
1781 COHOH.singlet  
1782 -----  
1783 E(CCSD(T)/Aug-CC-pVDZ) (Hartree): -189.28945263  
1784 E(CCSD/Aug-CC-pVDZ) (Hartree): -189.27117571  
1785 T1 diagnostic: 0.018492  
1786 E(MP2/Aug-CC-pVDZ) (Hartree): -189.25351896  
1787 E(MP3/Aug-CC-pVDZ) (Hartree): -189.26220354  
1788 E(RHF/Aug-CC-pVDZ) (Hartree): -188.73546297  
1789 E(CCSD(T)/Aug-CC-pVTZ) (Hartree): -189.45094207  
1790 E(CCSD/Aug-CC-pVTZ) (Hartree): -189.42401381  
1791 T1 diagnostic: 0.016940  
1792 E(MP2/Aug-CC-pVTZ) (Hartree): -189.41386277  
1793 E(MP3/Aug-CC-pVTZ) (Hartree): -189.41808470  
1794 E(RHF/Aug-CC-pVTZ) (Hartree): -188.78183765  
1795 E(CCSD(T)/Aug-CC-pVQZ) (Hartree): -189.50061595  
1796 E(CCSD/Aug-CC-pVQZ) (Hartree): -189.47168879  
1797 T1 diagnostic: 0.016379  
1798 E(MP2/Aug-CC-pVQZ) (Hartree): -189.46750983  
1799 E(MP3/Aug-CC-pVQZ) (Hartree): -189.46722402  
1800 E(RHF/Aug-CC-pVQZ) (Hartree): -188.79421239  
1801 E(UM062X/Aug-CC-pVQZ) (Hartree): -189.71341063  
1802 Electronic state : 1-A  
1803 Cartesian coordinates (Angs):  
1804 C -0.002363 0.601946 0.000038  
1805 O 1.003191 -0.266572 0.000053  
1806 O -1.111680 -0.083212 -0.000027  
1807 H 1.825177 0.231466 -0.000391  
1808 H -0.943093 -1.044870 -0.000048  
1809 Rotational constants (GHz): 75.6727600 12.5846400 10.7902000  
1810 Vibrational harmonic frequencies (cm-1):  
1811 650.3878 665.9853 775.8713  
1812 1151.7510 1178.9295 1355.1820  
1813 1431.7146 3616.4961 3878.5717  
1814 Zero-point correction (Hartree): 0.033500  
1815  
1816 COHOH.triplet  
1817 -----  
1818 E(CCSD(T)/Aug-CC-pVDZ) (Hartree): -189.19661759  
1819 E(CCSD/Aug-CC-pVDZ) (Hartree): -189.18112851  
1820 T1 diagnostic: 0.019829  
1821 E(MP2/Aug-CC-pVDZ) (Hartree): -189.16207786  
1822 E(MP3/Aug-CC-pVDZ) (Hartree): -189.17218006  
1823 E(PMP2/Aug-CC-pVDZ) (Hartree): -189.16352946  
1824 E(PMP3/Aug-CC-pVDZ) (Hartree): -189.17310884  
1825 E(PUHF/Aug-CC-pVDZ) (Hartree): -188.67674718  
1826 E(UHF/Aug-CC-pVDZ) (Hartree): -188.67436776  
1827 E(CCSD(T)/Aug-CC-pVTZ) (Hartree): -189.35593138  
1828 E(CCSD/Aug-CC-pVTZ) (Hartree): -189.33206721  
1829 T1 diagnostic: 0.018623  
1830 E(MP2/Aug-CC-pVTZ) (Hartree): -189.31934667  
1831 E(MP3/Aug-CC-pVTZ) (Hartree): -189.32569785  
1832 E(PMP2/Aug-CC-pVTZ) (Hartree): -189.32084816  
1833 E(PMP3/Aug-CC-pVTZ) (Hartree): -189.32663436  
1834 E(PUHF/Aug-CC-pVTZ) (Hartree): -188.72325173  
1835 E(UHF/Aug-CC-pVTZ) (Hartree): -188.72078905  
1836 E(CCSD(T)/Aug-CC-pVQZ) (Hartree): -189.40481521  
1837 E(CCSD/Aug-CC-pVQZ) (Hartree): -189.37900079  
1838 T1 diagnostic: 0.018157  
1839 E(MP2/Aug-CC-pVQZ) (Hartree): -189.37166866  
1840 E(MP3/Aug-CC-pVQZ) (Hartree): -189.37397072  
1841 E(PMP2/Aug-CC-pVQZ) (Hartree): -189.37318633  
1842 E(PMP3/Aug-CC-pVQZ) (Hartree): -189.37490610  
1843 E(PUHF/Aug-CC-pVQZ) (Hartree): -188.73565681

*Ubiquitous atmospheric production of organic acids: Supplementary Information*

1844 E(UHF/Aug-CC-pVQZ) (Hartree): -188.73317045  
1845 E(UM062X/Aug-CC-pVQZ) (Hartree): -189.62181967  
1846 Electronic state : 3-A  
1847 Cartesian coordinates (Angs):  
1848 C 0.000114 0.448736 0.174187  
1849 O 1.182485 -0.097286 -0.141156  
1850 O -1.182530 -0.097409 -0.141246  
1851 H 1.570762 -0.567966 0.606785  
1852 H -1.571077 -0.566892 0.607313  
1853 Rotational constants (GHz): 99.9934600 9.8800400 9.4790600  
1854 Vibrational harmonic frequencies (cm-1):  
1855 184.0671 408.9968 554.5190  
1856 1110.6166 1138.5761 1235.1842  
1857 1373.2973 3744.6035 3750.7037  
1858 Zero-point correction (Hartree): 0.030757  
1859  
1860 CHOH.singlet  
1861 -----  
1862 E(CCSD(T)/Aug-CC-pVDZ) (Hartree): -114.15593420  
1863 E(CCSD/Aug-CC-pVDZ) (Hartree): -114.14458897  
1864 T1 diagnostic: 0.019616  
1865 E(MP2/Aug-CC-pVDZ) (Hartree): -114.12235727  
1866 E(MP3/Aug-CC-pVDZ) (Hartree): -114.13655629  
1867 E(RHF/Aug-CC-pVDZ) (Hartree): -113.80217319  
1868 E(CCSD(T)/Aug-CC-pVTZ) (Hartree): -114.25328786  
1869 E(CCSD/Aug-CC-pVTZ) (Hartree): -114.23672036  
1870 T1 diagnostic: 0.018208  
1871 E(MP2/Aug-CC-pVTZ) (Hartree): -114.21983790  
1872 E(MP3/Aug-CC-pVTZ) (Hartree): -114.23094025  
1873 E(RHF/Aug-CC-pVTZ) (Hartree): -113.82991072  
1874 E(CCSD(T)/Aug-CC-pVQZ) (Hartree): -114.28235596  
1875 E(CCSD/Aug-CC-pVQZ) (Hartree): -114.26459721  
1876 T1 diagnostic: 0.017679  
1877 E(MP2/Aug-CC-pVQZ) (Hartree): -114.25188105  
1878 E(MP3/Aug-CC-pVQZ) (Hartree): -114.25972061  
1879 E(RHF/Aug-CC-pVQZ) (Hartree): -113.83720231  
1880 E(UM062X/Aug-CC-pVQZ) (Hartree): -114.41600941  
1881 Electronic state : 1-A  
1882 Cartesian coordinates (Angs):  
1883 C -0.730901 -0.153842 0.000074  
1884 O 0.567599 -0.096369 -0.000063  
1885 H -1.104700 0.898345 -0.000271  
1886 H 0.949315 0.795657 0.000331  
1887 Rotational constants (GHz): 283.1500200 36.8726700 32.6242400  
1888 Vibrational harmonic frequencies (cm-1):  
1889 1019.7665 1243.7754 1376.0688  
1890 1480.0959 2812.5402 3665.5825  
1891 Zero-point correction (Hartree): 0.026422  
1892  
1893 CHOH.triplet  
1894 -----  
1895 E(CCSD(T)/Aug-CC-pVDZ) (Hartree): -114.12343907  
1896 E(CCSD/Aug-CC-pVDZ) (Hartree): -114.11446864  
1897 T1 diagnostic: 0.020153  
1898 E(MP2/Aug-CC-pVDZ) (Hartree): -114.09424972  
1899 E(MP3/Aug-CC-pVDZ) (Hartree): -114.10763667  
1900 E(PMP2/Aug-CC-pVDZ) (Hartree): -114.09575836  
1901 E(PMP3/Aug-CC-pVDZ) (Hartree): -114.10857258  
1902 E(PUHF/Aug-CC-pVDZ) (Hartree): -113.80309330  
1903 E(UHF/Aug-CC-pVDZ) (Hartree): -113.80065827  
1904 E(CCSD(T)/Aug-CC-pVTZ) (Hartree): -114.21933192  
1905 E(CCSD/Aug-CC-pVTZ) (Hartree): -114.20541381  
1906 T1 diagnostic: 0.019201  
1907 E(MP2/Aug-CC-pVTZ) (Hartree): -114.18926685  
1908 E(MP3/Aug-CC-pVTZ) (Hartree): -114.20029284  
1909 E(PMP2/Aug-CC-pVTZ) (Hartree): -114.19084011  
1910 E(PMP3/Aug-CC-pVTZ) (Hartree): -114.20124116  
1911 E(PUHF/Aug-CC-pVTZ) (Hartree): -113.83134977  
1912 E(UHF/Aug-CC-pVTZ) (Hartree): -113.82881021  
1913 E(CCSD(T)/Aug-CC-pVQZ) (Hartree): -114.24785130  
1914 E(CCSD/Aug-CC-pVQZ) (Hartree): -114.23278042

*Ubiquitous atmospheric production of organic acids: Supplementary Information*

1915 T1 diagnostic: 0.018848  
1916 E(MP2/Aug-CC-pVQZ) (Hartree): -114.22017502  
1917 E(MP3/Aug-CC-pVQZ) (Hartree): -114.22842105  
1918 E(PMP2/Aug-CC-pVQZ) (Hartree): -114.22176158  
1919 E(PMP3/Aug-CC-pVQZ) (Hartree): -114.22936647  
1920 E(PUHF/Aug-CC-pVQZ) (Hartree): -113.83866737  
1921 E(UHF/Aug-CC-pVQZ) (Hartree): -113.83610914  
1922 E(UM062X/Aug-CC-pVQZ) (Hartree): -114.38602331  
1923 Electronic state : 3-A  
1924 Cartesian coordinates (Angs):  
1925 C -0.716558 0.102495 0.130956  
1926 O 0.588040 -0.127137 0.013225  
1927 H -1.467075 -0.241838 -0.572406  
1928 H 1.062103 0.643966 -0.319134  
1929 Rotational constants (GHz): 366.3597900 32.2441300 31.8322000  
1930 Vibrational harmonic frequencies (cm-1):  
1931 377.7685 1098.6325 1174.0520  
1932 1328.4396 3152.4645 3777.5920  
1933 Zero-point correction (Hartree): 0.024852  
1934  
1935 complex.HCOOH.HO2.a  
1936 -----  
1937 E(UM062X/Aug-CC-pVQZ) (Hartree): -340.71059958  
1938 Electronic state : 2-A  
1939 Cartesian coordinates (Angs):  
1940 C 1.088931 -0.205781 -0.000153  
1941 O 0.551712 0.871105 -0.000113  
1942 O -1.918410 -0.828016 0.000163  
1943 O -2.121923 0.459565 0.000023  
1944 H -1.215086 0.846401 -0.000063  
1945 O 2.401896 -0.372091 0.000060  
1946 H 2.822965 0.499364 0.000217  
1947 H 0.552329 -1.155585 -0.000302  
1948 Rotational constants (GHz): 16.0321700 2.0052500 1.7823200  
1949 Vibrational harmonic frequencies (cm-1):  
1950 64.1761 79.0221 115.8381  
1951 171.1161 235.1245 619.6777  
1952 666.3843 691.3324 1102.2413  
1953 1187.3025 1293.4842 1340.1297  
1954 1407.8792 1557.9352 1815.8635  
1955 3148.5773 3423.7153 3786.6767  
1956 Zero-point correction (Hartree): 0.051729  
1957  
1958 complex.HCOOH.HO2.b  
1959 -----  
1960 E(CCSD(T)/Aug-CC-pVDZ) (Hartree): -339.97928981  
1961 E(CCSD/Aug-CC-pVDZ) (Hartree): -339.94636800  
1962 T1 diagnostic: 0.025372  
1963 E(MP2/Aug-CC-pVDZ) (Hartree): -339.91932770  
1964 E(MP3/Aug-CC-pVDZ) (Hartree): -339.92693313  
1965 E(PMP2/Aug-CC-pVDZ) (Hartree): -339.92259461  
1966 E(PMP3/Aug-CC-pVDZ) (Hartree): -339.92878755  
1967 E(PUHF/Aug-CC-pVDZ) (Hartree): -339.01630415  
1968 E(UHF/Aug-CC-pVDZ) (Hartree): -339.01101948  
1969 E(CCSD(T)/Aug-CC-pVTZ) (Hartree): -340.26854710  
1970 E(CCSD/Aug-CC-pVTZ) (Hartree): -340.22008758  
1971 T1 diagnostic: 0.024424  
1972 E(MP2/Aug-CC-pVTZ) (Hartree): -340.20485554  
1973 E(MP3/Aug-CC-pVTZ) (Hartree): -340.20540734  
1974 E(PMP2/Aug-CC-pVTZ) (Hartree): -340.20836544  
1975 E(PMP3/Aug-CC-pVTZ) (Hartree): -340.20735659  
1976 E(PUHF/Aug-CC-pVTZ) (Hartree): -339.10012441  
1977 E(UHF/Aug-CC-pVTZ) (Hartree): -339.09446038  
1978 E(CCSD(T)/Aug-CC-pVQZ) (Hartree): -340.35730952  
1979 E(CCSD/Aug-CC-pVQZ) (Hartree): -340.30523094  
1980 T1 diagnostic: 0.024078  
1981 E(MP2/Aug-CC-pVQZ) (Hartree): -340.30003474  
1982 E(MP3/Aug-CC-pVQZ) (Hartree): -340.29313317  
1983 E(PMP2/Aug-CC-pVQZ) (Hartree): -340.30358382  
1984 E(PMP3/Aug-CC-pVQZ) (Hartree): -340.29508510  
1985 E(PUHF/Aug-CC-pVQZ) (Hartree): -339.12247625

*Ubiquitous atmospheric production of organic acids: Supplementary Information*

1986 E(UHF/Aug-CC-pVQZ) (Hartree): -339.11676187  
1987 E(UM062X/Aug-CC-pVQZ) (Hartree): -340.72033767  
1988 Point group : CS  
1989 Electronic state : 2-A"  
1990 Cartesian coordinates (Angs):  
1991 C -1.526800 -0.010221 0.000000  
1992 H -2.618015 0.019379 0.000000  
1993 O -0.911602 -1.055671 0.000000  
1994 O -0.993743 1.179356 0.000000  
1995 H -0.000000 1.093560 -0.000000  
1996 H 0.702310 -1.006917 -0.000000  
1997 O 1.667141 -0.713157 -0.000000  
1998 O 1.622768 0.583886 -0.000000  
1999 Rotational constants (GHz): 9.1462600 3.3329700 2.4428000  
2000 Vibrational harmonic frequencies (cm-1):  
2001 105.8469 ( A") 181.7186 ( A') 227.1010 ( A")  
2002 243.7568 ( A') 339.1231 ( A') 722.4485 ( A')  
2003 844.2478 ( A") 973.4398 ( A") 1101.9430 ( A")  
2004 1290.5418 ( A') 1330.0814 ( A') 1417.8565 ( A')  
2005 1475.3874 ( A') 1631.5078 ( A') 1781.3481 ( A')  
2006 2957.9731 ( A') 3125.9116 ( A') 3204.4428 ( A')  
2007 Zero-point correction (Hartree): 0.052295
